# Protein hyperacylation links mitochondrial dysfunction with nuclear organization

John Smestad<sup>1,2</sup>, Micah McCauley<sup>3</sup>, Matthew Amato<sup>2</sup>, Yuning Xiong<sup>4</sup>, Juan Liu<sup>5</sup>, Yi-Cheng Sin<sup>6</sup>, Jake Ellingson<sup>6</sup>, Yue Chen<sup>6</sup>, Fatimah Al Khazal<sup>2</sup>, Brandon Wilbanks<sup>2</sup>, Jeong-Heon Lee<sup>2,4</sup>, Tamas Ordog<sup>4,7</sup>, Ioulia Rouzina<sup>8</sup>, Mark Williams<sup>3</sup>, Jason W. Locasale<sup>5</sup> and L. James Maher III<sup>2,\*</sup>

<sup>1</sup>Mayo Clinic Medical Scientist Training Program,

<sup>2</sup>Department of Biochemistry and Molecular Biology,

Mayo Clinic College of Medicine and Science, Rochester, MN, USA

<sup>3</sup>Department of Physics, Northeastern University, Boston, MA, USA

<sup>4</sup>Epigenomics Program, Mayo Clinic, Rochester, MN, USA

<sup>5</sup>Department of Pharmacology and Cancer Biology, Duke University, Durham, NC, USA

<sup>6</sup>Department of Biochemistry, Molecular Biology and Biophysics,

University of Minnesota at Twin Cities, Minneapolis, MN, USA

<sup>7</sup>Department of Physiology and Biomedical Engineering,

Mayo Clinic College of Medicine and Science, Rochester, MN, USA

<sup>8</sup>Department of Chemistry and Biochemistry, Ohio State University, Columbus, OH, USA

\*Lead contact

# 1 **Summary**

2 Cellular metabolism is linked to epigenetics, but the biophysical effects of metabolism on  
3 chromatin structure and implications for gene regulation remain largely unknown. Here, using a  
4 broken tricarboxylic acid (TCA) cycle and disrupted electron transport chain (ETC) exemplified  
5 by succinate dehydrogenase subunit C (SDHC) deficiency, we investigated the effects of  
6 metabolism on chromatin architecture over multiple distance scales [nucleosomes ( $\sim 10^2$  bp),  
7 topologically-associated domains (TADs;  $\sim 10^5 - 10^6$  bp), and chromatin compartments ( $\square 10^6 -$   
8  $10^8$  bp)]. Metabolically-driven hyperacetylation of histones led to weakened nucleosome  
9 positioning in multiple types of chromatin, and we further demonstrate that lysine acylation  
10 directly destabilizes histone octamer-DNA interactions. Hyperacetylation of cohesin subunits  
11 correlated with decreased mobility on interphase chromatin and increased TAD boundary  
12 strength, suggesting that cohesin is metabolically regulated. Erosion of chromatin compartment  
13 distinctions reveals metabolic regulation of chromatin liquid-liquid phase separation. The TCA  
14 cycle and ETC thus modulate chromatin structure over multiple distance scales.

15

16

17 Summary word count: 147 (limit 150)

18

19 Keywords: metabolism, mitochondria, tricarboxylic acid cycle, electron transport chain,

20 succinate dehydrogenase, epigenetics, acylation, nucleosome, chromatin

21

22

# 1 Introduction

2 Mammalian epigenomic states are tightly coupled to cellular metabolism through  
3 multiple mechanisms (Dai et al., 2020; Etchegaray and Mostoslavsky, 2016; Reid et al., 2017),  
4 but an understanding of the effects of metabolic perturbations on the hierarchical structure of  
5 chromatin is in its very early stages. For example, pioneering studies examining direct effects of  
6 metabolism-driven epigenetic alterations on chromatin structure demonstrated that  
7 oncometabolite inhibition of TET1/2 DNA demethylases relevant to several human malignancies  
8 (Caramazza et al., 2010; Letouze et al., 2013; Toro et al., 2003; Yan et al., 2009) results in  
9 accumulation of DNA hypermethylation preventing the binding of CCCTC-binding factor  
10 (CTCF) to genomic DNA, resulting in loss of insulation between topologically-associated  
11 domains (TADs) and aberrant gene expression (Flavahan et al., 2019; Flavahan et al., 2016).  
12 There is also growing recognition that defects in the mitochondrial tricarboxylic acid (TCA)  
13 cycle and electron transport chain (ETC) are common in diabetes, heart disease, and cancer (Le  
14 et al., 2019; Miranda-Goncalves et al., 2018; Rosario et al., 2018; Tzika et al., 2018). In each of  
15 these cases, genetic and environmental contributions are hypothesized to drive metabolic  
16 alterations with corresponding epigenetic perturbations. Chromatin disorganization has been  
17 described in each of these diseases (Bysani et al., 2019; Corces et al., 2018; Costantino et al.,  
18 2017; Kleppe et al., 2018; Rosa-Garrido et al., 2017), though analyses infrequently assess the full  
19 hierarchical range of chromatin structure. It is unclear whether metabolically-driven epigenetic  
20 perturbations cause the chromatin structure changes in these diseases.

21 Here we demonstrate that mitochondrial TCA cycle and ETC dysfunction, exemplified  
22 through genetic knockout (KO) of succinate dehydrogenase subunit C (SDHC) in immortalized  
23 mouse embryonic fibroblasts (iMEFs), results in disruption of chromatin architecture at multiple

1 distance scales including nucleosomes ( $\sim 10^2$  bp), topologically-associated domains (TADs;  $\sim 10^5$   
2  $- 10^6$  bp), and chromatin compartments ( $\square 10^6 - 10^8$  bp). Further, we show that hyperacylation of  
3 nucleosome and non-nucleosome chromatin proteins is responsible for this coupling between  
4 metabolism and the epigenome. At the distance scale of nucleosomes, we demonstrate that  
5 SDHC KO results in a nucleosome lysine hyper-pan-acylation phenotype correlating with  
6 increased inter-dyad distances and weakened positioning of nucleosomes along the linear  
7 genome. These effects are partially reversible by treatment with histone acetyltransferase  
8 inhibitors (HATi). Our studies of direct effects of acyl PTMs on the biophysical properties of  
9 nucleosomes demonstrate that bulk nucleosomal acylation weakens histone-DNA interactions,  
10 enhancing nucleosome breathing, and promoting histone octamer diffusion along DNA  
11 molecules with reconstituted nucleosomes in the absence of externally-applied force or  
12 nucleosome remodeling activity. This suggests that histone hyperacylation and thermal energy  
13 are sufficient to drive nucleosome repositioning along DNA. Through profiling of genome-wide  
14 topological contact maps, we detect enhanced TAD boundary strength in SDHC KO cells,  
15 correlating with enhanced stability of cohesin complexes on chromatin in fluorescence recovery  
16 after photo-bleaching (FRAP) experiments and with hyperacylation of multiple cohesin subunits  
17 identified through targeted SILAC proteomic analysis. These results suggest that the stability of  
18 cohesin on chromatin may be metabolically regulated. At the distance scale of chromatin  
19 compartments, we show that SDHC KO results in decreased compartmentalization, preferentially  
20 impacting heterochromatic B compartments, and correlating with an equilibration of epigenomic  
21 marks between A/B compartments. We verify this phenomenon of eroded chromatin  
22 compartmentalization upon SDHC KO using immunofluorescence confocal microscopy and  
23 volumetric analysis of single cells, with partial rescue of the phenotype observed by treatment

1 with HATi. We additionally demonstrate that a similar phenomenon of attenuated chromatin  
2 compartmentalization is observed upon pharmacological inhibition of ETC complex V with  
3 oligomycin A, an effect similarly rescued by treatment with HATi. Finally, we demonstrate that  
4 pharmacological inhibition of sirtuin 1 (SIRT1) by EX-527 is sufficient to induce attenuated  
5 chromatin compartmentalization, directly implicating SIRT1 in this process. Thus, perturbation  
6 of TCA cycle and ETC metabolism, exemplified by SDHC KO, modulates chromatin structure at  
7 three distance scales by acylation-dependent effects on nucleosome and non-nucleosome  
8 chromatin proteins.

# 1 **Results**

## 2 **TCA cycle disruption causes a protein pan-hyperacylation phenotype**

3 To study effects of TCA cycle and ETC dysfunction, we leveraged a tissue culture model  
4 involving normal and SDHC-knockout iMEFs (**Figure S1A**) (Smestad et al., 2018a; Smestad et  
5 al., 2018b; Smestad and Maher, 2019). Using these cells, we first assessed impacts of SDHC KO  
6 on cellular metabolism using untargeted metabolomic analysis. This revealed statistically-  
7 significant perturbation of >200 polar metabolites (**Dataset S1**). Chemical similarity enrichment  
8 analysis using ChemRICH (Barupal and Fiehn, 2017) revealed strong increases in several  
9 metabolite structural classes, including amino acids, dipeptides, and, interestingly, carnitines  
10 (**Figure 1A**). Broad increases were noted for short-, medium-, and long-chain acyl-carnitines, as  
11 well as reduction in levels of free L-carnitine (**Figure 1B**). These changes were associated with  
12 defective mitochondrial ultrastructure (**Figure S1B**) and reduction of ETC complex subunits  
13 (Smestad et al., 2018a). This correlation is consistent with prior reports linking ETC dysfunction  
14 with increased fatty acid oxidation (FAO) (Chen et al., 2018; Vazquez et al., 2015) and  
15 accumulation of acyl-carnitines (Audano et al., 2019), and may be related to the known physical  
16 association of FAO enzymes with ETC complexes (Wang et al., 2010; Wang et al., 2019b).  
17 Acyl-carnitine concentrations correspond to the concentrations of their respective reactive acyl-  
18 CoAs (Liu et al., 2015). The latter are capable of protein acylation at lysine residues (Simithy et  
19 al., 2017), suggesting to us the possibility that protein hyperacylation may be a consequence of  
20 SDHC KO.

21 Our analysis of enriched metabolite structural classes additionally revealed a striking  
22 increase in adenine nucleotides (**Figure 1A**), with notable inclusion of NAD<sup>+</sup> and related  
23 metabolite ADP-ribose (**Figure 1C**), correlating with increases in tryptophan and quinolinate

1 (precursors in *de novo* NAD<sup>+</sup> biosynthesis), but not nicotinamide (a precursor in the NAD<sup>+</sup>  
2 salvage pathway) (Hassa et al., 2006; Stein and Imai, 2012) (**Figure 1D**). Endogenous  
3 production of ADP-ribose from NAD<sup>+</sup>, known to occur via multiple mechanisms (Hassa et al.,  
4 2006), is correlated with increased expression NAD<sup>+</sup> glycohydrolases (Lee and Zhao, 2019) in  
5 the absence of other notable change in expression of NAD<sup>+</sup>-consuming and ADP-ribose  
6 generating enzyme activities (**Figure S1C**). ADP-ribose has previously been described as an  
7 endogenous sirtuin inhibitor (Madsen et al., 2016), suggesting to us the possibility of sirtuin  
8 inhibition in SDHC KO cells. Levels of nicotinamide, another known endogenous sirtuin  
9 inhibitor, were not changed upon SDHC loss (**Figure 1D**). Independent measurement showed the  
10 NAD<sup>+</sup>/NADH ratio to be decreased upon SDHC KO (**Figure S1D**), correlating with reduced  
11 levels of the protein subunits of NADH Dehydrogenase (ETC complex I) and an increase in  
12 lactate dehydrogenase (LDH) (**Figure S1E**), as well as increased lactate and decreased pyruvate  
13 (**Figure S1F**). These effects suggest that SDHC KO cells unsuccessfully induce LDH to rescue  
14 the abnormally low NAD<sup>+</sup>/NADH ratio, further supported by observations of the synthetic  
15 lethality of LDH loss with SDH loss (Bancos et al., 2013; Smestad et al., 2018b). While recent  
16 work has suggested that physiological NADH concentrations do not inhibit relevant sirtuins  
17 (Madsen et al., 2016), the collective metabolomic changes suggested to us that sirtuin activities  
18 may be inhibited upon SDHC KO.

19 Because of the relevance of sirtuin activity to protein acylation levels, we assessed  
20 endogenous sirtuin activity in SDHC KO and control cells using a genetically-encoded  
21 fluorescent reporter system. This system is sensitive to activities of SIRT1, SIRT2, SIRT3, and  
22 SIRT5 (Xuan et al., 2017). Monitoring by flow cytometry provided detection of sirtuin activity  
23 in SDHC KO and control cells (**Figure S1G**). Indeed, comparison of sirtuin activities (eGFP

1 fluorescence) in the relevant subset of dual mCherry<sup>+</sup> and eGFP<sup>+</sup> cells created from SDHC KO  
2 and control lines revealed a significant decrease in sirtuin activity in SDHC KO cells relative to  
3 control (Wilcox rank sum p-value: 0.01, **Figure 1E**). This change did not correlate with  
4 alteration of sirtuin protein expression or subcellular localization (**Figure S1H**).

5         The combination of elevated concentrations of reactive acyl-CoAs and sirtuin inhibition  
6 is predicted to synergistically increase lysine PTM acylation marks on cellular proteins including  
7 nucleosomes (Li et al., 2016; Simithy et al., 2017; Vaquero et al., 2004; Vaquero et al., 2006).  
8 We therefore leveraged previously-reported SILAC proteomic data for SDHC KO and control  
9 cell lines (Smestad et al., 2018a) to quantitate lysine acylation in high-abundance peptides. This  
10 analysis revealed profound elevation of multiple lysine acyl PTM marks in SDHC KO cells,  
11 including acetylation, propionylation, butyrylation, crotonylation, succinylation, and  
12 glutarylation (**Figure 1F**). To examine whether hyperacylation included histone proteins, we  
13 performed Western blotting of nuclear extracts using antibodies specific to various representative  
14 histone acetylation marks including H3K27ac and H4K(5, 8, 12, 16)ac as well as antibodies  
15 specific for propionyllysine, butyryllysine, malonyllysine, and succinyllysine, with signal  
16 normalization to total histone. This analysis revealed H3K27 and H4K(5, 8, 12, 16)  
17 hyperacetylation, and increased H3 butyrylation and succinylation in the SDHC KO cell line  
18 relative to control (**Figure 1G-L**). These data support a model in which TCA cycle and ETC  
19 chain dysfunction, exemplified by SDHC KO, elevate multiple acyl PTMs, with effects  
20 extending to histone proteins in the nucleus (**Figure 1M**).

21

22



1

## 2 **Histone hyperacylation upon SDHC KO alters nucleosome positioning**

3        Having demonstrated that SDHC KO results in a protein hyper-pan-acylation phenotype  
4 affecting nucleosomes, we next used this model system to ask if dysfunction of the TCA cycle  
5 and ETC influences nucleosome positioning along the linear genome. Histone acetylation has  
6 previously been proposed to alter nucleosome stability and positioning by histone lysine charge  
7 neutralization causing attenuation of favorable electrostatic interactions with DNA (Fenley et al.,  
8 2010; Fenley et al., 2018), and between histone tails (Dion et al., 2005; Otterstrom et al., 2019;  
9 Zhang et al., 2017a), as well as recruitment of ATP-dependent chromatin remodelers (Clapier et  
10 al., 2017). The mechanisms by which other acylation marks may impact chromatin structure are  
11 less clear, but a similar model invoking core histone lysine charge neutralization has been  
12 proposed for propionylation, butyrylation, and crotonylation (Fenley et al., 2018). To study the  
13 combined effects of nucleosome pan-hyperacylation in SDHC KO cells, we first performed  
14 automated annotation of epigenomic states across the genome using CUT&RUN and ChIP-seq  
15 data from SDHC KO and control cell lines (**Figure S2A-H**) and the ChromHMM algorithm  
16 (Ernst and Kellis, 2017) to generate a 12-state epigenomic annotation (**Figure S2I-N**). We then  
17 performed ATAC-seq in SDHC KO and control cells (**Dataset S2**), followed by an analysis of  
18 nucleosome positions using the NucleoATAC analysis pipeline (Schep et al., 2015), examining  
19 the impact of SDHC KO on nucleosome positioning within 10-Mbp random samples of genomic  
20 regions mapping to each of the epigenomic states determined by ChromHMM. Unsurprisingly,  
21 ATAC-seq coverage was enriched for euchromatic chromatin states (**Figure S2O**). Differences  
22 in nucleosomal inter-dyad distances between SDHC KO and control cells were determined for  
23 each of the identified epigenomic states. This revealed that SDHC KO cells have statistically-

1 significant increases in inter-dyad distances at euchromatic chromatin regions including CTCF  
2 binding sites, simple repeats, enhancers, and gene promoters (**Figure 2A**). Differences were also  
3 calculated for nucleosome fuzziness scores (a metric of nucleosome positioning at the called  
4 position) along the linear genome, revealing weakened positioning upon SDHC KO for all  
5 chromatin epigenomic states except promoter downstream regions (**Figure 2B**). Analysis of  
6 ATAC-seq peaks additionally demonstrated a gain in total peak number for SDHC KO cells  
7 relative to control (**Figure S3A-C**). These changes are consistent with a model in which histone  
8 hyperacetylation in SDHC KO cells results in attenuated nucleosome stability and weakened  
9 positioning.

10 We next assessed whether weakened nucleosome positioning induced in SDHC KO cells  
11 could be reversed by chemical inhibition of histone acetylation. To this end, SDHC KO cells  
12 were treated with inhibitors of p300/CBP and Gcn5 histone acetyltransferases (10  $\mu$ M C646 and  
13 100  $\mu$ M MB-3, respectively), resulting in ~40% reduction in H3K27ac after 72 hours (**Figure**  
14 **S3D,E**). We then performed ATAC-seq profiling of SDHC KO cells treated with these histone  
15 acetyltransferase inhibitors (HATi) or vehicle, assessing impacts on nucleosome inter-dyad  
16 distances and fuzziness scores. Remarkably, HATi treatment of SDHC KO cells partially rescued  
17 the nucleosome inter-dyad distance distribution, and completely rescued the weakened  
18 nucleosome positioning for all chromatin regions assessed (**Figure 2C,D**). Similarly, ATAC-seq  
19 analysis revealed a decrease in total peak number for SDHC KO cells treated with HATi relative  
20 to vehicle (**Figure S3F-H**). These results demonstrate that weakened nucleosome positioning  
21 upon SDHC KO can be reversed through targeted reduction of histone acetylation by HATi,  
22 implicating histone acetylation as a functionally-important acylation mark controlling  
23 nucleosome positioning *in vivo*.

1

## 2 **Histone hyperacylation weakens nucleosomes *in vitro***

3 To assess direct biophysical effects of nucleosome acylation, including acylation marks  
4 that are difficult to individually manipulate *in vivo*, we developed a single-molecule *in vitro*  
5 assay. We performed optical tweezers experiments after treatment of reconstituted nucleosome  
6 arrays (**Figure 3A**) with different acyl-CoAs to quantify non-enzymatic acylation impacts on  
7 nucleosome stability. Under increasing tension, DNA has been previously shown to separate  
8 from the octamer in two distinct phases. At stretching forces up to 5 pN, the outer  $\frac{1}{2}$  turns are  
9 gradually disrupted as contacts between the DNA and the histone tails of the (H3-H4)<sub>2</sub> tetramer  
10 are displaced along with partial disruption of interactions with the H2A/H2B core dimer (**Figure**  
11 **3B**). Direct interactions between the inner DNA loop and histone helices in the tetramer and the  
12 H2A/H2B dimers (referred to as ‘strong sites’) are abruptly and individually disrupted at  
13 stretching forces above 10 pN (Brower-Toland et al., 2005a; Brower-Toland et al., 2002;  
14 McCauley et al., 2019). **Figure 3C** shows typical force-extension data for a control array and for  
15 arrays treated with acetyl-CoA and succinyl-CoA.

16 The behavior of reconstituted nucleosome arrays acylated by exposure to acyl-CoAs in  
17 aqueous buffer differs from untreated arrays in three critical ways. First, the unmodified array  
18 shows a force-extension plateau below 5 pN of stretching force, an effect entirely absent in the  
19 treated arrays, indicating that histone acylation essentially eliminates stabilizing interactions  
20 between the exit/entry DNA  $\frac{1}{2}$  turns and the histones (**Figure 3C**). Thus, all subsequent data  
21 characterize the disruption of the inner DNA loop from the strong sites. These strong site  
22 interactions, characterized by ‘rips’ in the extension data, are disrupted by lower stretching  
23 forces in treated arrays (**Figure 3D**), while the amount of DNA that remains wrapped also

1 decreases, indicating weakened histone – DNA interactions for each nucleosome in the treated  
2 arrays (**Figure 3E**). Averaged over all arrays, we see that lysine modification by acyl groups of  
3 increasing length and negative charge is increasingly destabilizing (**Figure 3F,G**). Fitting this  
4 disruption data determines the natural nucleosome opening (or ‘breathing’) rate in the absence of  
5 force (**Figure 3H**). This opening rate increases for all histone acylations, growing with the length  
6 of the added group, and nearly doubling for the longest chains that also reverse the net lysine  
7 charge from a cation to an anion. As expected, the persistence length of DNA was unchanged by  
8 acyl-CoA treatment (**Figure 3I**), indicating that acylation of histone lysines does not modulate  
9 the intrinsic stiffness of DNA itself.

10         The finding that nucleosomes are weakened by acylation, which increases nucleosomal  
11 opening, was further supported by the results of ensemble *in vitro* transcription experiments  
12 utilizing DNA template sequences bearing single reconstituted nucleosomes, demonstrating  
13 decreased transcriptional pausing by an elongating bacteriophage RNA polymerase at acylated  
14 nucleosomes (**Figure S4A,B**). This result suggests that acylated nucleosomes pose a lower  
15 barrier to the passage of translocating molecular machines (Chang et al., 2013; Studitsky et al.,  
16 1995). Together, these *in vitro* data support the conclusion that chemical acylation weakens  
17 nucleosomes, reducing disruption force, extent of DNA wrapping, and stability to RNA  
18 polymerase elongation, with all acylation marks displaying qualitatively similar effects that  
19 increase in magnitude with the negative charge on the acylation mark.

20         Since our ATAC-seq data demonstrated weakened nucleosome positioning along the  
21 linear genome of SDHC KO cells, and because *in vitro* acylation of histone lysines weakened  
22 histone octamer interactions with DNA, we next assessed whether histone acylation can promote  
23 nucleosome sliding within a linear DNA construct. We reconstituted single histone octamers

1 onto a 624-bp duplex DNA construct containing a Widom 601 nucleosome-positioning sequence  
2 (**Figure 3J**) (Lowary and Widom, 1998). Reconstituted nucleosomes were then exposed to acyl-  
3 CoAs in aqueous buffer, followed by restriction digestion to produce DNA fragments amenable  
4 to nucleosome positioning analysis by agarose gel electrophoresis (**Figure 3K**). In the absence of  
5 acyl-CoA treatment, reconstituted nucleosomes remain localized exclusively to the restriction  
6 fragment containing the Widom 601 nucleosome positioning sequence. Remarkably, acylation  
7 causes nucleosome migration, resulting in repositioned nucleosomes along the DNA construct,  
8 including nucleosomes localized on the restriction fragment lacking the positioning sequence  
9 (**Figure 3L,M; Figure S4C**). This acylation-induced nucleosome migration is driven only by  
10 thermal energy, independent of any external force or ATP-dependent nucleosome remodeling  
11 complex, demonstrating that multiple types of lysine acylation marks promote nucleosome  
12 sliding along linear DNA.

13

#### 14 **SDHC KO increases TAD boundary strength and cohesin stability on chromatin**

15 We next examined the effects of TCA cycle and ETC dysfunction due to SDHC KO on  
16 higher levels of chromatin organization, beginning with topologically-associated domains  
17 (TADs). For this purpose, we generated three-dimensional chromatin contact maps for SDHC  
18 KO and control cells using a modified Hi-C method (eHi-C) (Lu et al., 2018). We leveraged the  
19 Juicer analysis pipeline (Durand et al., 2016) and the Knight-Ruiz method for normalization of  
20 chromatin contact matrices (Knight and Ruiz, 2013). Since cell cycle stage is a known  
21 determinant of chromatin topological organization (Nagano et al., 2017), we first ruled out  
22 differences in cell cycle distribution between SDHC KO and control cell populations using  
23 DAPI/Geminin staining and analytical flow cytometry to show similar cell proportions in G1,

1 early S, and late S-G2 phases (**Figure S5A,B**). Analysis of biological replicate eHi-C  
2 experiments for SDHC KO and control cells using HiCRep (Yang et al., 2017) revealed good  
3 agreement between replicates, with larger differences observed between SDHC KO and control  
4 groups (**Figure 4A**). Insulation scores for all chromosomes were then calculated for each  
5 biological replicate using a 10-Kbp resolution contact matrix and a sliding 500 Kbp  $\times$  500 Kbp  
6 window (**Figure S5C**), as previously described (Crane et al., 2015). Analysis of inter-replicate  
7 insulation score correlations further demonstrated good agreement between biological replicates,  
8 with larger differences observed between SDHC KO and control groups (**Figure S5D**). TAD  
9 boundaries were called jointly for SDHC KO and control datasets using the insulation score  
10 method (Crane et al., 2015), which is sensitive for identifying TADs across a wide range of read  
11 depths (Zufferey et al., 2018). This identified 2286 TADs with boundary strength  $>0.5$ , allowing  
12 us to assess differences in TAD boundary strength between SDHC KO and control cell lines.  
13 Remarkably, this analysis revealed a profound enhancement in TAD boundary strength in SDHC  
14 KO cells relative to controls (**Figure 4B-E**). The notion that TAD boundary strength can be  
15 linked to TCA cycle and ETC dysfunction provides evidence that TCA cycle activity can alter  
16 genome organization by a mechanism known to be important for gene regulation.

17       Recent evidence suggests that TADs are dynamic structures, forming and dissolving  
18 during interphase on minute timescales as a function of cohesin dissociation from chromatin  
19 (Hansen et al., 2018; Hansen et al., 2017). We therefore designed experiments to test if enhanced  
20 TAD stability in SDHC KO cells could be attributed to altered stability of cohesin on interphase  
21 chromatin. We performed fluorescence recovery after photobleaching (FRAP) experiments  
22 leveraging transient expression of mEmerald-labeled cohesin components STAG2 and RAD21 in  
23 SDHC KO and control cells. Intensities of pre-bleach regions of interest (ROIs) in these

1 experiments were similar between SDHC KO and control cells (**Figure S5E,F**). Importantly,  
2 analysis of FRAP profiles revealed increased stability of both STAG2 and RAD21 cohesin  
3 components on chromatin in SDHC KO cells relative to controls (**Figure 4F,G, Movies S1-4**),  
4 consistent with the increase in TAD boundary strength observed in bulk chromatin contact maps.

5 To understand the basis for increased stability of cohesin on chromatin in SDHC KO  
6 cells, we checked for differences in abundance of CTCF, cohesin subunits, or known cohesin  
7 regulators as detected by SILAC proteomics. The abundance of these components did not  
8 significantly differ between SDHC KO and control cell lines (**Figure S5G**), suggesting that the  
9 differences in TAD boundary strength are not due to altered expression of cohesin subunits or  
10 known cohesin regulators. We also monitored CTCF site occupancy from ATAC-seq footprint  
11 analysis, revealing similar occupancy profiles in both SDHC KO and control cell lines (**Figure**  
12 **S4H,I**). Because DNA binding by CTCF is known to be inhibited by cytosine methylation at  
13 CpG sites (Hashimoto et al., 2017), and a previous report has linked SDH loss to DNA  
14 hypermethylation with inhibition of CTCF binding (Flavahan et al., 2019), we checked the DNA  
15 methylation status of CTCF CpG sites using reduced representation bisulfite sequencing  
16 (RRBS). This study revealed no significant difference in CTCF CpG methylation between  
17 SDHC KO and control cells (**Fig S5J**). Together, these data suggest that genomic occupancy by  
18 CTCF does not differ between SDHC KO and control cells. Post-translational acetylation of  
19 cohesin subunit SMC3 by ESCO1/ESCO2 has been reported to modulate cohesin binding to  
20 interphase chromatin (Kawasumi et al., 2017). However, no differences in SMC3 K105/K106  
21 acetylation were observed between SDHC KO and control cells (**Figure S5K,L**).

22 In the absence of alterations in known determinants of cohesin stability on interphase  
23 chromatin, we studied the possibility that post-translational modification of cohesion subunits

1 differs between SDHC KO and controls cells. We therefore performed SILAC proteomics in  
2 SDHC KO and control cell lines. Following SILAC labeling of control cells using heavy ( $^{13}\text{C}_6$ -  
3 labeled) lysine and arginine, and culture of SDHC KO cells in equivalent media containing light  
4 ( $^{12}\text{C}_6$ -labeled) lysine and arginine, cohesin complexes were purified from cell lysates by  
5 immunoprecipitation and gel electrophoresis prior to proteomic analysis of pooled heavy and  
6 light (H+L) peptides. Analysis of raw peptide abundance H/L ratios ranged from 1.5-2.3,  
7 indicating an excess of control (heavy) peptides relative to SDHC KO (light) peptides. Analysis  
8 of acyl PTMs identified a total of 129 acyl PTMs at 89 unique sites on SMC1A, SMC3, and  
9 RAD21. Strikingly, the vast majority of identified acyl PTMs (101/129), including all non-acetyl  
10 acylations, were detectable only in SDHC KO cells, despite the raw peptide abundance favoring  
11 the control specimens (**Figure 4H**). Conservative estimation of SILAC H/L ratio from measured  
12 peptide intensities and quantification of site-specific signal-to-noise ratios, normalized to input  
13 peptide abundance, suggests a dramatic increase in non-acetyl acylation PTMs on cohesin  
14 subunits in SDHC KO (**Figure 4I**). We also found that locations of acetylation PTMs and non-  
15 acetyl acylation PTMs are generally non-overlapping, suggesting different regulatory  
16 mechanisms (**Figure 4J**). In addition, the majority of identified sites bear either 1 or 2 acyl  
17 PTMs, with a small subset displaying 3 or 4 different acyl PTMs (**Figure 4K**). This suggests the  
18 possibility of site-specific competition. These observations are consistent with a model in which  
19 dysfunction of the TCA cycle and ETC results in pan-hyperacylation of cohesin subunits,  
20 correlating with altered cohesin biophysics on chromatin.

21

22

23



## 1 **Chromatin hyperacetylation upon SDHC KO reduces chromatin compartmentalization**

2 Finally, we examined effects of TCA cycle and ETC dysfunction on chromatin  
3 compartmentalization, leveraging eHi-C datasets generated for SDHC KO and control cells.  
4 Strikingly, SDHC KO results in attenuated chromatin compartmentalization (**Figure 5A**).  
5 Analysis of compartment eigenvector autocorrelations revealed that attenuated  
6 compartmentalization is concentrated in B (heterochromatic) compartments relative to A  
7 (euchromatic) compartments (**Figure 5B-E**). Compartment identity was found to be generally  
8 conserved, with 92% of compartments having the same identity between SDHC KO and control  
9 cell lines. We checked whether decreased chromatin compartmentalization correlated with  
10 altered distribution of epigenetic marks, considering the portion of the genome with conserved  
11 compartment identity between SDHC KO and control cell lines. This analysis identified a  
12 remarkable erosion of compartment-specific epigenetic marks, resulting in a trend toward  
13 equilibration of epigenetic states (**Figure 5F-H**) that correlates with compartment structural  
14 erosion observed in autocorrelation analysis. Specifically, we see that levels of A compartment  
15 marks, including H3K27ac and H3K4me3, are reduced in A compartments and increased in B  
16 compartments upon SDHC KO (**Figure 5F,G**). The B compartment mark, H3K27me3, exhibits a  
17 similar pattern reflecting a net gain in A compartments and loss in B compartments (**Figure 5H**).  
18 Collectively, these data demonstrate that the observed weakening of chromatin  
19 compartmentalization upon TCA cycle and ETC dysfunction correlates with a dramatic  
20 perturbation of epigenetic states that blurs the distinction between compartment identities.

21 Because chromatin compartment identity is a known determinant of transcriptional  
22 patterns (Lieberman-Aiden et al., 2009) (**Figure 5I**), we next assessed whether altered  
23 compartment structures correlate with transcriptional effects. Indeed, for the subset of

1 compartments that flip A/B compartment state upon SDHC KO (~8% of genome), we detect  
2 transcriptional changes that accompany this alteration in compartment identity (**Figure 5J**).

3 We verified the phenomenon of reduced chromatin compartmentalization using an  
4 orthogonal approach involving multiplexed immunostaining of fixed cells with antibodies  
5 specific to H3K27ac and H3K27me3. When followed by DAPI staining and high resolution  
6 confocal microscopy, this approach allows volumetric reconstruction of single nuclei to derive  
7 chromatin spatial information at the distance scale of chromatin compartments (**Figure 5K**),  
8 similar to a previously-reported method (Linhoff et al., 2015). Following image acquisition,  
9 Trainable Weka Segmentation (TWS) (Arganda-Carreras et al., 2017) was used to derive a pixel-  
10 based segmented nuclear model from DAPI fluorescence, classifying individual pixels as extra-  
11 nuclear, nucleoplasm, or DAPI heterochromatin puncta via a FastRandomForest algorithm  
12 comprised of 100 trees, each constructed from 7 random features trained on a total of 27,881  
13 manually-annotated instances derived from images of SDHC KO and control cells (**Figure 5L**).  
14 10-fold cross validation revealed the classifier to be robust, with 99.98% of manually-annotated  
15 instances correctly classified. This approach was applied to analyze SDHC KO and control cells,  
16 and cells exposed to ETC complex V inhibitor oligomycin A, and SIRT1 inhibitor EX-527, both  
17 of which increase histone H3K27 acetylation (**Figure 5M**). Effects of HATi in SDHC KO and  
18 oligomycin A-treated cells were also explored. Using CellProfiler (McQuin et al., 2018) for  
19 automated image analysis to assess H3K27ac and H3K27me3 puncta/nucleoplasm intensity  
20 immunofluorescence ratios for individual cells, we found that SDHC KO increases both  
21 H3K27ac and H3K27me3 marks in DAPI puncta relative to nucleoplasm, with reversal of these  
22 patterns upon HATi treatment (**Figure 5N,O**). A similar pattern of altered H3K27ac distribution  
23 was observed upon oligomycin A exposure, with corresponding rescue by co-treatment with

1 HATi. A prior report has suggested that H3K27me3 marks a specific subset of heterochromatin  
2 not enriched in DAPI puncta (Linhoff et al., 2015). Accordingly, the observation of increased  
3 H3K27ac and H3K27me3 marks in DAPI heterochromatin puncta indicates reduced chromatin  
4 compartmentalization upon SDHC KO or oligomycin A exposure, with rescue of normal  
5 compartmentalization upon HATi treatment. Attenuated chromatin compartmentalization in  
6 TCA cycle and ETC dysfunction, with rescue by HATi treatment, was further supported by  
7 analysis of DAPI heterochromatin puncta volumes. Increased DAPI puncta volumes were found  
8 in both SDHC KO cells and oligomycin A-treated cells, again with rescue by HATi treatment  
9 (**Figure 5P,Q**). DAPI heterochromatin volumes were also increased upon EX-527 treatment,  
10 directly implicating SIRT1 in maintenance of chromatin compartmentalization, though an altered  
11 spatial distribution of H3K27ac and H3K27me3 was not observed. These results demonstrate  
12 that the TCA cycle and ETC regulate epigenetic marks modulating chromatin  
13 compartmentalization in living cells, consistent with recent evidence that chromatin liquid-liquid  
14 phase separation (LLPS) may be regulated by post-translational modification of histone proteins,  
15 including acetylation (Gibson et al., 2019b; Wang et al., 2019a).

16

## 17 **Discussion**

18 **A protein hyperacylation phenotype is associated with dysfunction of the TCA cycle and**  
19 **ETC**

20 Here we show that TCA and ETC dysfunction, triggered by SDHC loss, results in  
21 accumulation of acylcarnitines, NAD<sup>+</sup> and ADP-ribose with a reduced NAD<sup>+</sup>/NADH ratio,  
22 sirtuin inhibition, and a protein pan-hyperacylation phenotype extending to histone and non-

1 histone proteins in chromatin. We subsequently demonstrate acylation-dependent perturbations  
2 in chromatin structure over three discrete distance scales including mononucleosomes, TADs,  
3 and chromatin compartments. Epigenomic perturbation linked to TCA cycle and ETC  
4 dysfunction is relevant to both rare human diseases such as SDH-mutant paraganglioma and  
5 pheochromocytoma (Fishbein et al., 2017; Letouze et al., 2013), gastrointestinal stromal tumors  
6 (Gill et al., 2010; Gill et al., 2011), and IDH-mutant glioblastoma (Brennan et al., 2013), as well  
7 as common disorders including type II diabetes mellitus and heart failure. In the latter cases,  
8 ETC dysfunction with consequent sirtuin inhibition and a protein hyperacylation phenotype has  
9 been reported both for peripheral tissues in type II diabetes and cardiomyocytes in heart failure  
10 (Bagul et al., 2015; Lee et al., 2016). We predict that the epigenomic and chromatin structural  
11 changes we report upon SDHC loss will be mirrored in these disease states.

12

### 13 **Histone acylation weakens nucleosomes**

14 We report ATAC-seq experiments that demonstrate increased nucleosome inter-dyad  
15 distances and de-localization upon SDHC KO, correlating with a histone lysine hyperacylation  
16 phenotype. These perturbations tend to be rescued by HAT inhibition, consistent with prior  
17 reports that nucleosome acetylation increases chromatin accessibility (Gorisch et al., 2005;  
18 Zhang et al., 2017b). Impacts of other acyl PTMs on nucleosome biophysical properties have  
19 previously been unclear, however. Fenley et al. (Fenley et al., 2018) proposed a core histone  
20 charge reduction model based on computational predictions for acylation marks on lysine  
21 residues near DNA including propionylation, butyrylation, and crotonylation. The majority of  
22 reported acyl-CoA modifications have been found within the tetrameric (H3-H4)<sub>2</sub> tails  
23 (Anderson et al., 2001; Bintu et al., 2012; Brower-Toland et al., 2005b; Hebbes et al., 1994;

1 Kebede et al., 2017; Simpson et al., 1978). Here we directly measure how total histone acylation  
2 affects the stability of individual nucleosomes, strikingly demonstrating that lysine modification  
3 by acyl-CoAs reduces nucleosome stability. Unwinding of the outer half turns of DNA from  
4 modified nucleosomes occurred spontaneously, consistent with weakened interactions between  
5 DNA and the preferentially acylated (H3-H4)<sub>2</sub> tails, and explaining the known role of acylation  
6 in facilitating Pol II transcription (Bintu et al., 2012). We also quantified significant weakening  
7 of the off-dyad strong nucleosome sites anchoring the inner turn of DNA, detected as a reduction  
8 of the release stretching force and shrinking of the histone-DNA interaction site size, leading to a  
9 natural strong site opening rate increase by several fold. A comparable study of nucleosomal  
10 acylation catalyzed by the p300 enzyme also revealed decreased tetramer release forces with a  
11 modest reduction of DNA held by the tetramer tails, though a smaller number of lysine residues  
12 may have been modified (Brower-Toland et al., 2005a). We found that the effects of acylation  
13 progressively increase with the number of carbons of the added chain and upon change in lysine  
14 charge from +1 to -1. In the most extreme cases, chemical acylation destabilizes nucleosomes  
15 more than deletion of all histone tails. Finally, our fitted natural nucleosome opening rate, a  
16 reliable signature of the overall site stability, increases with longer (and more negatively  
17 charged) acyl modifications, suggesting an enhanced probability of histone octamer sliding along  
18 the DNA.

19

## 20 **Nucleosome acylation induces spontaneous migration along linear DNA**

21 Currently recognized determinants of nucleosome positioning along the linear genome  
22 include DNA sequence composition, non-histone DNA binding proteins, ATP-dependent  
23 nucleosome remodelers, and the presence of transcription factors (Chereji and Clark, 2018). Our

1 *in vitro* analysis strikingly demonstrates that nucleosome acylation is sufficient to promote  
2 repositioning, presumably by histone octamer sliding, along a linear DNA construct. This result  
3 shows that neutralizing or inverting lysine charges in histones lubricates the octamer-DNA  
4 interface, facilitating a fundamentally different kind of nucleosome mobility. The results of this  
5 experiment suggest that chromatin acylation *in vivo* may facilitate redistribution of nucleosomes  
6 along the linear genome. Testing this hypothesis *in vivo* is complicated by the challenge of  
7 targeted perturbation of individual acyl-CoAs without disrupting other metabolic pathways  
8 (Kustatscher et al., 2019).

9

## 10 **Hyperacylation of cohesin increases its stability on interphase chromatin**

11 Cohesin mobility on interphase chromatin is known to be regulated by PTMs including  
12 phosphorylation (Bauerschmidt et al., 2011) and SMC3 K105/K106 acetylation (Kawasumi et  
13 al., 2017). Here we show that dysfunction of the TCA cycle and ETC results in decreased  
14 mobility of cohesin on interphase chromatin, and that this correlates with increased abundance of  
15 acyl PTMs on multiple cohesin subunits. Aside from SMC3 K105/106 acetylation, the vast  
16 majority of acetylation PTMs on cohesin subunits have unknown functions in regulating cohesin  
17 biophysics. In addition to acetylation, we here implicate non-acetyl acylations as having potential  
18 functional roles in cohesion regulation. Future studies utilizing *in vitro* systems will be needed to  
19 confirm that hyperacylation of cohesin, or introduction of site-specific lysine charge  
20 modifications, results in altered biophysics on chromatin. Assessment of site-specific  
21 contributions of individual acyl PTMs to cohesin stabilization on chromatin also remain to be  
22 determined. If future studies confirm that cohesin hyperacylation results in altered kinetics of  
23 chromatin binding, this would establish a direct mechanism by which formation of chromatin

1 loops anchoring topological associated domains is metabolically regulated. Intriguingly,  
2 metabolic regulation of cohesin by sirtuins has previously been proposed, based both on analysis  
3 of functional overlap of sirtuin and cohesin genomic localization in yeast (Li et al., 2013), and by  
4 analysis of SIRT6 protein interaction networks in human cells (Simeoni et al., 2013). Modulation  
5 of cohesin function by metabolic effects has not previously been demonstrated. It remains  
6 unclear whether the non-acetyl acylation sites identified in our analysis are regulated by sirtuins,  
7 and further mechanistic work will be a high priority for future study.

8

### 9 **Chromatin hyperacetylation weakens A/B compartmentalization**

10 Links between epigenomic state and chromatin compartmentalization have been  
11 previously proposed (Jost et al., 2014; Nuebler et al., 2018). An intriguing hypothesis is that the  
12 separation of chromatin into A/B compartments is driven by chromatin-associated proteins that  
13 mediate the process of liquid-liquid phase separation (LLPS) (Larson et al., 2017; Strom et al.,  
14 2017). Evidence has also emerged that post-translational modifications of histone proteins may  
15 regulate chromatin phase separation through recruitment of chromatin-associated proteins that  
16 modulate LLPS (Wang et al., 2019a). A prior report has demonstrated that chromatin acetylation  
17 weakens LLPS *in vitro* (Gibson et al., 2019a), consistent with our observation that chromatin  
18 hyperacetylation in the context of TCA cycle and ETC dysfunction in living cells results in  
19 attenuated chromatin compartmentalization, and is rescued by HATi treatment. Here we extend  
20 the current paradigm by demonstrating a direct mitochondrial role in regulating chromatin A/B  
21 compartmentalization. It remains unclear whether the multiple dysregulated acyl PTMs in TCA  
22 cycle and ETC dysfunction share similar effects in perturbing chromatin compartmentalization.

- 1 This will likely be best assessed by future *in vitro* studies examining the impact of individual
- 2 nucleosome acylations on chromatin LLPS.
- 3



## 1 **Author contributions**

2 Conceptualization, J.S. and L.J.M; Methodology, J.S., L.J.M., Y.X., J.H.L., T.O., J.L., M.A.,  
3 B.W., M.M., M.W., and Y.C.; Validation, J.S.; Formal Analysis, J.S., and Y.C.; Investigation,  
4 J.S., M.M., Y.X., M.A., F.K., B.W., J.L., Y.C.S., J.E., and Y.C.; Resources, L.J.M. and J.S.;  
5 Data Curation, J.S.; Writing – Original Draft, J.S.; Writing – Review & Editing, L.J.M., J.S.,  
6 M.M. M.A., Y.X., J.L., Y.C.S., J.E., Y.C., F.A.K. B.W., J.H.L., T.O., J.W.L., M.W., and I.R.;  
7 Visualization, J.S.; Supervision, L.J.M., M.W., J.H.L., Y.C., J.W.L.; Project Administration,  
8 L.J.M.; Funding Acquisition, L.J.M, J.S.

9

# 1 **Acknowledgements**

2           This work was facilitated by the Mayo Clinic Medical Genome Facility Sequencing Core,  
3 the Mayo Clinic Epigenetics Development Laboratory, the Mayo Clinic Microscopy and Cell  
4 Analysis Core Facility, the Mayo Clinic Research Computing Facility, and the University of  
5 Minnesota Proteomics Core Facility. We thank the staff of the Epigenomics Development  
6 Laboratory and Recharge Center (EDL) at Mayo Clinic for carrying out the ATAC-seq assays  
7 for this study. The EDL is supported in part by the Mayo Clinic Center for Individualized  
8 Medicine. We thank Peter Schultz (Scripps Research Institute) for the gift of pcDNA-mCherry-  
9 EGFP (K85TAG) and pCMVAcKRS-tRNAPyl plasmids used for sirtuin activity measurements.  
10 We thank Steven Henikoff (Fred Hutchinson Cancer Research Center, HHMI) for the gift of  
11 protein A-micrococcal nuclease fusion protein used for CUT&RUN profiling of epigenetic  
12 marks. We thank Karolin Luger (University of Colorado) for the gift of human histone octamers  
13 used for some nucleosome reconstitution experiments. We thank Georges Mer and Maria  
14 Victoria Botuyan (Mayo Clinic) for the gift of plasmid pET-15b-derived vectors for the  
15 expression of human histones H2A (pHISPP/H2A), H2B (pHISPP/H2B), H3.1 (pHISPP/H3.1),  
16 and H4 (pHISPP/H4), and technical assistance with other nucleosome reconstitution  
17 experiments. We thank Christina Murray for assistance with false-color image reconstruction in  
18 Fig. 3M.

19  
20

# 1 **Conflicts of interest**

2 None declared.

3

## 1 **Funding**

2 Financial support for this work was from the Mayo Clinic, NIH grants R01CA166025 (Maher),  
3 T32GM065841 (Mayo Clinic Medical Scientist Training Program), F30CA220660 (Smestad),  
4 R25 GM075148 (Amato), and generous support from the Paradifference Foundation (Maher).  
5 T.O. and J.H.L. received support from the Mayo Clinic Center for Individualized Medicine and  
6 R01DK058185.

7

## 1 **Main figure titles and legends**

2 **Figure 1. SDHC KO causes a pan-hyperacylation phenotype affecting chromatin.** (A)  
3 ChemRICH structural similarity enrichment analysis of metabolic perturbations detected in  
4 SDHC KO cells relative to control cells. Colors indicate mean  $\log_2$ (fold change) for the  
5 respective metabolite structural classes. (B) Changes in acyl-carnitine metabolites detected in  
6 SDHC KO cells relative to control cells (\* denotes p-value < 0.05 by two-sided heteroscedastic t-  
7 test, adjusted by FDR for multiple comparisons). Bar color denotes acyl chain length [red: short  
8 (< 7), green: medium (7 - 12), blue: long (> 12)]. (C) Changes in adenine nucleotides detected in  
9 SDHC KO cells relative to control cells. Statistical analysis was as in (B). (D) Changes in NAD<sup>+</sup>  
10 biosynthetic precursors detected in SDHC KO cells relative to control cells. Statistical analysis  
11 was as in (B). (E) Quantification of relative sirtuin activity in SDHC KO and control cells by  
12 flow cytometry using an acylation-dependent, genetically-encoded fluorescent probe (\* denotes  
13 p-value < 0.05 by Wilcox rank-sum test). (F) SILAC proteomics aggregate site-specific  
14 quantification ratios of acylated peptides normalized by corresponding protein abundance in  
15 SDHC KO and control cells. (G) Western blot quantification of H3K27ac normalized to total H3  
16 (\* denotes p-value < 0.05 by two-sided t-test). (H) Western blot quantification of H4ac (K5, K8,  
17 K12, and K16) normalized to total H4 (\* denotes p-value < 0.05 by two-sided t-test). (I) Western  
18 blot quantification of pan-propionyl H3 normalized to total H3. (J) Western blot quantification of  
19 pan-butyryl H3 normalized to total H3 (\* denotes p-value < 0.05 by two-sided t-test). (K)  
20 Western blot quantification of pan-malonyl H3 normalized to total H3. (L) Western blot  
21 quantification of pan-succinyl H3 normalized to total H3 (\* denotes p-value < 0.05 by two-sided  
22 t-test). (M) Schematic illustration of metabolic effects observed in SDHC KO cells contributing  
23 to the chromatin hyperacylation phenotype. Error bars indicate standard deviations in all cases.

1  
2 **Figure 2. SDHC KO causes chromatin decompaction partially reversible by histone**  
3 **acetyltransferase inhibition.** NucleoATAC analysis of nucleosome position and fuzziness  
4 (delocalization) was performed for ChromHMM-called chromatin states. X-axes denote  
5 parameter fold-change and y-axes denote  $-\log_{10}(\text{p-value})$  calculated by Wilcox rank-sum test.  
6 (A) Analysis of nucleosome inter-dyad distance changes in SDHC KO cells relative to control.  
7 (B) Analysis of nucleosome fuzziness changes in SDHC KO cells relative to control. (C)  
8 Analysis of nucleosome inter-dyad distance changes in HATi-treated [MB-3 (100  $\mu\text{M}$ ) and C646  
9 (10  $\mu\text{M}$ ) for 72 h] SDHC KO cells relative to vehicle-treated SDHC KO cells. (D) Analysis of  
10 nucleosome fuzziness changes in HATi-treated [MB-3 (100  $\mu\text{M}$ ) and C646 (10  $\mu\text{M}$ ) for 72 h]  
11 SDHC KO cells relative to vehicle-treated SDHC KO cells.

12  
13 **Figure 3. Acylation weakens nucleosomes *in vitro*.** (A) Reconstituted nucleosome array  
14 analysis using optical tweezers. (B) Schematic of two stages of force-induced DNA release; the  
15 two outer half turns of DNA release below 5 pN while the inner loop of DNA is disrupted at  
16 higher forces. (C) Plot of force vs. extension analyzing an array of 12 nucleosomes reconstituted  
17 on linearized plasmid DNA disrupted under increasing tension (black). Colors indicate pre-  
18 incubation of arrays with 2 mM acyl-CoAs (red: acetyl-CoA, purple: succinyl-CoA). Gray traces  
19 indicate fits to the worm-like chain polymer model, each separated by 78-bp contour lengths, as  
20 described in the supplemental methods. (D) Measured release force for each nucleosome within  
21 an array for untreated arrays without incubation (black,  $n = 16$ ), arrays incubated at room  
22 temperature without addition of acyl-CoAs (grey,  $n = 10$ ), and arrays treated with acetyl-CoA  
23 (red,  $n = 8$ ), propionyl-CoA (yellow,  $n = 8$ ), butyryl-CoA (green,  $n = 12$ ), malonyl-CoA (blue,  $n$

1 = 15), and succinyl-CoA (violet,  $n = 8$ ). (E) DNA length released upon destabilization of each  
2 nucleosome measured at the force shown in D. (F) Averaged release force change per  
3 nucleosome for untreated arrays vs. treated arrays that result in the lysine modifications shown in  
4 the key. (G) Averaged released base pairs per nucleosome for untreated and treated arrays. (H)  
5 Fitted natural rate of DNA-nucleosome opening. (I) Fitted persistence lengths of DNA exposed  
6 to acetyl-CoA (red) or succinyl-CoA (violet). Error bars indicate standard error in the mean for  
7 the respective measurements. Color codes in panels G-I are as in panel F. (J) Schematic  
8 representation of DNA construct used for nucleosome reconstitutions. (K) Illustration of  
9 experimental workflow used for gel analysis of acylation-dependent effects on nucleosome  
10 migration. (L) Ethidium-stained 1.5% agarose gel showing nucleosome reconstitution (lanes 3-6)  
11 followed by the indicated acylation (or mock) treatment and HindIII digestion. (M) Same as L  
12 but overlay of false-color images reflecting fluorescent detection with FAM and Cy5 filters  
13 (green and red), respectively. DNA fragment sizes (249 bp, 375 bp) are shown along with  
14 position of mononucleosome at Widom 601 sequence (“mono”) and co-migrating novel  
15 nucleosome species (\*) with both FAM and Cy5 signals.

16

17 **Figure 4. SDHC KO results in enhanced TAD boundary strength and increased cohesin**  
18 **stability on chromatin, correlating with cohesin hyperacylation.** (A) HiCRep stratum-  
19 adjusted correlation coefficients calculated at 1 Mbp resolution for biological replicate eHi-C  
20 datasets. (B) TAD boundary strengths in SDHC KO and control cells (\* denotes  $p$ -value  $< 0.05$   
21 by Wilcox rank-sum test). (C) KR-normalized eHi-C contact matrices for SDHC KO (x-axis)  
22 and control (y-axis) eH-C datasets showing chromosome 3 (0-140 Mbp) at 250 Kbp resolution.  
23 (D) Subset of (C) showing SDHC KO (x-axis) and control (y-axis) eH-C chromosome 4 (69-82

1 Mbp) at 25 Kbp resolution. Arrows indicate positions of identified TAD boundaries. Arrows  
2 with stems indicate increased boundary strength in SDHC KO cells relative to control [ $\log_2(\text{fold-}$   
3  $\text{change}) > 1$ ]. Arrowheads without stems indicate TADs with unchanged boundary strength. (E)  
4 Plot of TAD boundary strength in SDHC KO and control cells. Colors indicate TADs with  
5 increased [ $\log_2(\text{fold-change}) > 1$ ] and decreased [ $\log_2(\text{fold-change}) < -1$ ] boundary strength in  
6 SDHC KO relative to control cells. (F) Aggregate normalized FRAP curves for mEmerald-  
7 STAG2 transiently expressed in SDHC KO (N=12) and control (N=13) cells. Ranges indicate  
8 SEM. (G) Aggregate normalized FRAP curves for mEmerald-RAD21 transiently expressed in  
9 SDHC KO (N=24) and control (N=15) cells. Ranges indicate SEM. (H) Acyl PTMs identified on  
10 cohesin subunits via SILAC proteomics. Amino acid positions on respective cohesin subunits are  
11 indicated. Colors indicate PTM presence (gray: unchanged SDHC KO vs. control; black:  
12 uniquely identified in SDHC KO). (I) Estimated protein-normalized acyl PTM SILAC H/L  
13 ratios. For PTMs only identified in SDHC KO line, H/L ratio estimated as  $1/(\text{S/N ratio})$ . (J)  
14 Venn diagram of acetylation and non-acetyl acylation site locations. (K) Histogram of number of  
15 PTM types per site identified.

16

17 **Figure 5. SDHC KO causes weakened chromatin compartmentalization, rescued by**  
18 **inhibition of histone acetyltransferases.** (A) Pearson correlation coefficient matrix calculated  
19 from eHi-C contact matrices of SDHC KO (x-axis) and control (y-axis) chromosome 4 (0-155  
20 Mb) at 500 Kbp resolution. Compartment eigenvectors, ChromHMM annotations, and ATAC-  
21 seq peaks are shown. (B) Genome-wide compartment autocorrelations calculated as a function of  
22 bin separation along the linear genome for SDHC KO and control cells. (C) Compartment  
23 autocorrelations within “A” compartments. (D) Compartment autocorrelations within “B”



1 compartments. (E) Calculated differences in compartment autocorrelation between SDHC KO  
2 and control cells. (F-H) Boxplots of CPM-normalized reads per 250 Kbp bin for genomic regions  
3 mapping to A and B compartments with conserved identities in SDHC KO and control cells for  
4 (F) H3K27ac CUT&RUN, (G) H3K4me3 CUT&RUN, and (H) H3K27me3 ChIP-seq. (I)  
5 Boxplot of RNA-seq TPM-normalized expression quantities for transcripts mapping to A and B  
6 compartments in control cells. (J) Analysis of RNA-seq TPM-normalized expression changes for  
7 genes mapping to compartments that convert between A/B in SDHC KO cells relative to genes  
8 mapping to compartments that do not convert. (K) Representative images from multiplexed  
9 staining and volumetric imaging of fixed cell nuclei. Voxel dimension is 140 nm square  
10 horizontally and 320 nm vertically. (L) Representative segmented nuclear model derived from  
11 DAPI 3D image stack using Trainable Weka Segmentation. (M) Western blot of H3K27ac and  
12 total H3 for control cells treated with oligomycin (1  $\mu$ M for 24 h), oligomycin and C646/MB-3  
13 (10  $\mu$ M C646, 100  $\mu$ M MB-3 for 24 h), or EX-527 (20  $\mu$ M for 24 h). (N) Analysis of H3K27ac  
14 intensity ratio for DAPI-stained puncta relative to non-puncta regions of nucleus. (O) Analysis of  
15 H3K27me3 intensity ratio for DAPI-stained puncta relative to non-puncta regions of nucleus. (P)  
16 Quantification of DAPI puncta total volume per cell. (Q) Quantification of DAPI puncta  
17 percentage of nucleus volume. \* denotes p-value < 0.05 by Wilcox rank-sum test.

18

19 **Figure 6. Schematic illustration of mechanisms by which mitochondrial electron transport**  
20 **chain dysfunction in SDHC KO affect chromatin structure.**

21

22

## 1 Supplemental figure titles and legends

2 **Figure S1. Metabolic analysis of SDHC KO and control cells, related to Figure 1.** (A)  
3 Western blot of SDHC protein in SDHC KO and control cells. (B) Transmission electron  
4 microscopy analysis of mitochondrial morphology in SDHC KO and control cells. (C) RNA-seq  
5 analysis of ADP-ribose-producing biological activities in SDHC KO and control cells. (D)  
6 Quantification of NAD<sup>+</sup>/NADH ratio in SDHC KO and control cells (\* denotes p-value < 0.05  
7 by two-sided t-test). (E) SILAC proteomic quantification of LDH and NADH Dehydrogenase  
8 complex subunit expression change in SDHC KO cells relative to control. (F) Analysis of polar  
9 metabolites involved in glycolysis, fermentation, TCA cycle, aspartate anaplerosis, and  
10 glutamine cataplerosis in SDHC KO and control cells. (G) Flow cytometry analysis of sirtuin  
11 activity using genetically-encoded reporter. Conditions denoted “+ Plasmids” indicate  
12 transfection with pcDNA-mCherry-EGFP (K85TAG) and pCMVAcKRS-tRNAPyl plasmids.  
13 “+AcK” denotes the addition of acetyllysine to 5 mM concentration. (H) Western blot analysis of  
14 sirtuin protein levels in cytosolic and nuclear subcellular fractions for SDHC KO and control.

15 **Figure S2. CUT&RUN analysis and generation of ChromHMM states, related to Figure 2.**  
16 (A) SeqMonk genomic view of epigenomic profiles generated from CUT&RUN and ChIP-seq at  
17 5 kbp resolution for control cell line. Error bars indicate STDEV for CPM-normalized probe  
18 quantities from biological replicate experiments. (B-H) Fragment length histograms from  
19 CUT&RUN profiling in SDHC KO and control cell lines using antibodies specific to H3K27ac,  
20 H3K4me3, H3K27me2, CTCF, acetyllysine, propionyllysine, and butyryllysine. (I) ChromHMM  
21 emission parameter correlations plotted as a function of number of states in stacked epigenomic  
22 model. (J) ChromHMM emission parameters. (K) ChromHMM genomic enrichments for RefSeq  
23 annotations. (L) ChromHMM TSS enrichment patterns. (M) ChromHMM TES enrichment  
24 patterns. (N) ChromHMM state descriptions. (O) Boxplot of ATAC-seq coverage for  
25 ChromHMM states.

26 **Figure S3. Supplemental ATAC-seq analysis and verification of SDHC KO H3K27ac**  
27 **rescue by HATi treatment, related to Figure 2.** (A) Analysis of fragment length from ATAC-  
28 seq experiments in SDHC KO and control lines. (B) ATAC-seq peak numbers for SDHC KO  
29 and control lines identified by the MACS peak-calling algorithm. (C) Analysis of genomic  
30 localization of ATAC-seq peaks in SDHC KO and control cells. (D) Western blot analysis of  
31 H3K27ac and total H3 in SDHC KO cells treated with HATi (10 μM C646, 100 μM MB-3) for  
32 24-72 h. (E) Quantification of relative H3K27ac/H3 ratio as a function of HATi treatment  
33 duration. \* denotes two-tailed p-value < 0.05 by unpaired t-test. (F) Analysis of fragment length  
34 from ATAC-seq experiments in SDHC KO cells either treated with HATi (10 μM C646, 100 μM  
35 MB-3) or vehicle for 72 h. (G) ATAC-seq peak numbers for SDHC KO cells either treated with  
36 HATi (10 μM C646, 100 μM MB-3) or vehicle for 72 h identified by the MACS peak-calling  
37 algorithm. (H) Analysis of genomic localization of ATAC-seq peaks in SDHC KO cells either  
38 treated with HATi (10 μM C646, 100 μM MB-3) or vehicle for 72 h.

39 **Figure S4. Supplemental analysis of nucleosome stability on reconstituted DNA constructs,**  
40 **related to Figure 3.** (A,B) Analysis of nucleosome stability by monitoring T7 RNA polymerase  
41 transcription pausing and stopping during elongation at 4°C *in vitro* as described in methods.  
42 RNA transcripts were radiolabeled during preliminary open complex formation by transcription

1 of a U-free cassette prior to cooling to 4°C and additional of all NTPs. Quantitation of two main  
2 stop sites near the center of the reconstituted nucleosome and normalization to the extent of  
3 template reconstitution (Nucleosome Obstacle Activity Per Reconstituted Template; NOAPRT)  
4 was as described in methods. Reduced NOAPRT values reflect less stable nucleosomes. *In vitro*  
5 nucleosome acylating agents and temperatures are indicated. (A) Example of results of single  
6 pilot study for multiple conditions. (B) Representative result and quantitation from independent  
7 studies (n = 3). (C) Agarose gel analysis of acylation-dependent effects on the stability of  
8 reconstituted nucleosomes, related to Figure 3K,L. Bands visualized with EtBr post-staining.  
9 Novel nucleosome species indicated as \*.

10

11 **Figure S5. Supplemental analysis of cell cycle stages, factors affecting CTCF genomic**  
12 **occupancy, and cohesin acetylation, related to Figure 4.** (A,B) Flow cytometry analysis of  
13 cell cycle stages in SDHC KO and control cells by DAPI-Geminin staining. (C) Insulation scores  
14 calculated for first 20 Mbp of chromosome 1 for biological replicate experiments for SDHC KO  
15 and control cells. (D) Heatmap showing genome-wide correlation for insulation between  
16 insulation scores calculated for biological replicate SDHC KO and control cells. (E,F) Analysis  
17 of initial cellular fluorescence for ROIs in FRAP experiments using mEmerald-STAG2 (E) and  
18 mEmerald-RAD21 (F). Statistical comparison of distributions is performed using a Wilcox rank-  
19 sum test. (G) Quantifications of change in expression of CTCF (black), cohesin subunits (red)  
20 and known cohesin regulators (blue) in SDHC KO relative to control cells by SILAC  
21 proteomics. (H,I) Genome-wide CTCF footprints calculated from ATAC-seq data for SDHC KO  
22 and control cells. (J) Quantification of CpG methylation at CTCF binding sites in SDHC KO and  
23 control cells (“ns” denotes lack of statistical significance in comparison of distributions by  
24 Wilcox rank-sum test). (K) Western blot analysis of SMC3ac Lys105/106 and total SMC3 in  
25 SDHC KO and control cell lines. (L) Quantitative analysis of SMC3ac Lys 105/106 relative to  
26 total SMC3. Statistical comparison by unpaired two-tailed t-test.

27

# 1 **STAR methods**

## 2 **Immortalized mouse embryonic fibroblast cell lines**

3 SDHC KO and hemizygous control immortalized mouse embryonic fibroblast cell lines  
4 used in this study have been described previously (Smestad et al., 2018a; Smestad et al., 2018b;  
5 Smestad and Maher, 2019). For routine cell culture applications, cells were grown in DMEM  
6 containing 10% FBS (Gibco cat# 10437), penicillin/streptomycin antibiotics (0.5 mg/mL), non-  
7 essential amino acids (100  $\mu$ M each of glycine, alanine, asparagine, aspartic acid, glutamic acid,  
8 proline, and serine), sodium pyruvate (1 mM), and HEPES buffer (10 mM) at 21% O<sub>2</sub> and 5%  
9 CO<sub>2</sub>.

10

## 11 **Metabolite extraction**

12 Metabolite extraction was performed as described in a previous study (Liu et al., 2015).  
13 Briefly, SDHC KO and control iMEF cells were plated in triplicate into 6-well plates at a  
14 concentration of 5 million cells per well in DMEM containing 10% FBS (Gibco cat# 10437),  
15 penicillin/streptomycin antibiotics (0.5 mg/mL), non-essential amino acids (100  $\mu$ M each of  
16 glycine, alanine, asparagine, aspartic acid, glutamic acid, proline, and serine), sodium pyruvate  
17 (1 mM), and HEPES buffer (10 mM). After 20 h, media was aspirated and the cells were  
18 washed with 0.9% NaCl. All residual saline solution was then aspirated and the plate was placed  
19 on dry ice. Pre-chilled 80% methanol/water (1 mL; HPLC-grade methanol: Sigma Aldrich cat#  
20 34860-1L-R; HPLC-grade water: Sigma Aldrich cat # 34877-1L) was added to each well, and  
21 the plate was transferred to the -80°C freezer for 15 min for further inactivation of enzyme

1 activities. Cells were then scraped into the methanol/water mixture on dry ice and transferred to  
2 1.5 mL Eppendorf microcentrifuge tubes. Samples were subjected to centrifugation at 20,000×g  
3 for 10 min at 4°C to pellet cellular debris, and the clarified supernatant solutions were then  
4 transferred into new 1.5 mL Eppendorf microcentrifuge tubes prior to drying of samples on a  
5 Speed Vac at room temperature. Dried pellets were then stored at -80°C until use in downstream  
6 analysis. The dry pellets were reconstituted into 30 μL sample solvent  
7 (water:methanol:acetonitrile, 2:1:1, v/v) and 3 μL was further analyzed by liquid  
8 chromatography-mass spectrometry (LC-MS).

9

## 10 **Metabolite LC-MS**

11 Ultimate 3000 UHPLC (Dionex) is coupled to Q Exactive Plus-Mass spectrometer (QE-  
12 MS, Thermo Scientific) for metabolite profiling. A hydrophilic interaction chromatography  
13 method (HILIC) employing an Xbridge amide column (100 × 2.1 mm i.d., 3.5 μm; Waters) is  
14 used for polar metabolite separation. Detailed LC method was described previously (Liu et al.,  
15 2014) except that mobile phase A was replaced with water containing 5 mM ammonium acetate  
16 (pH 6.8). The QE-MS is equipped with a HESI probe with related parameters set as below:  
17 heater temperature, 120 °C; sheath gas, 30; auxiliary gas, 10; sweep gas, 3; spray voltage, 3.0 kV  
18 for the positive mode and 2.5 kV for the negative mode; capillary temperature, 320 °C; S-lens,  
19 55; A scan range (m/z) of 70 to 900 was used in positive mode from 1.31 to 12.5 min. For  
20 negative mode, a scan range of 70 to 900 was used from 1.31 to 6.6 min and then 100 to 1,000  
21 from 6.61 to 12.5 min; resolution: 70000; automated gain control (AGC),  $3 \times 10^6$  ions.  
22 Customized mass calibration was performed before data acquisition.

1

2

### 3 **Metabolomics data analysis**

4 LC-MS peak extraction and integration were performed using commercial available  
5 software Sieve 2.2 (Thermo Scientific). The peak area was used to represent the relative  
6 abundance of each metabolite in different samples. The missing values were handled as  
7 described in a previous study (Liu et al., 2014). Statistical testing for differential metabolite  
8 abundance was performed using two-sided t-test with FDR correction for multiple hypothesis  
9 testing. Chemical structural similarity analysis was performed with ChemRICH (Barupal and  
10 Fiehn, 2017).

11

### 12 **NAD<sup>+</sup>/NADH ratio quantification**

13 SDHC KO and control cells were plated at a density of  $3 \times 10^5$  cells per well of a 6 well  
14 plate and allowed to recover overnight. The next day, cells were dissociated by trypsinization,  
15 quenched with media, pelleted by centrifugation for 5 min at 500×g, and washed with cold PBS.  
16 Measurement of NAD<sup>+</sup>/NADH ratio was performed using the BioVision NAD<sup>+</sup>/NADH  
17 quantification colorimetric kit (BioVision catalog# K337). Statistical testing was performed  
18 using a two-tailed t-test.

19

### 20 **Sirtuin activity measurements**

1 Measurement of sirtuin activity in SDHC KO and control iMEF cell lines was according  
2 to a previously-published method (Xuan et al., 2017). pcDNA-mCherry-EGFP (K85TAG) and  
3 pCMVAcKRS-tRNAPyl plasmids used this experiment were the gifts of Peter Schultz (Scripps  
4 Research Institute). Briefly, SDHC KO and control iMEF cells were seeded at 30,000 cells/well  
5 in 12-well plates under the standard cell culture conditions specified above. The next day,  
6 pcDNA-mCherry-EGFP (K85TAG) and pCMVAcKRS-tRNAPyl plasmids were diluted into  
7 Opti-MEM, combined with diluted Lipofectamine 3000 reagent, and co-transfected into cells.  
8 One h later, acetyllysine solution was added to the wells to final concentration of 5 mM, and the  
9 plate was returned to the incubator overnight. The next day, mCherry and eGFP signals in  
10 individual cells were analyzed by analytical flow cytometry. Relative sirtuin activity was  
11 quantified by measuring the degree of eGFP fluorescence in the subset of dual mCherry and  
12 eGFP-positive cells for each cell line. Statistical testing for differences in sirtuin activity was  
13 performed using a Wilcox rank-sum test.

14

### 15 **SILAC proteomic quantification of acylation**

16 Previously published SILAC proteomic datasets for SDHC KO and control cells  
17 (Smestad et al., 2018a; Smestad et al., 2018b) were searched for quantifiable site-specific  
18 acylation modifications. Modification SILAC H/L ratios were subsequently normalized  
19 according to protein abundance in the respective cell lines. For statistical testing, normalized  
20 SILAC H/L ratios for all quantified sites were grouped according to acylation type, and  
21 distributions of SILAC H/L ratios were compared by 1-way ANOVA for differences between  
22 categories.

1

## 2 **Western blotting**

3           For whole cell extraction, SDHC KO and control cells were lysed in RIPA buffer (50  
4 mM Tris-HCl, 5 mM EDTA, 150 mM NaCl, 0.1% SDS, 0.5% DOC, 1% NP-40) on ice for 15  
5 min, with gentle pipetting and intermittent vortexing. Lysates were then centrifuged at 15,000×g  
6 for 5 min to pellet cellular debris, and protein concentrations of the recovered supernatants were  
7 quantified by BCA assay.

8           For analysis of subcellular fractions, SDHC KO and control cells harvested by  
9 trypsinization, pelleted via centrifugation at 600×g for 5 min at 4°C, washed 2× with ice cold  
10 PBS, and washed once with ice cold TBS. Following the last wash, cells were lysed in 0.3 mL  
11 hypotonic lysis buffer (10 mM HEPES-NaOH pH 7.9, 10 mM KCl, 1.5 mM MgCl<sub>2</sub>, 0.5 mM DTT,  
12 0.1% (v/v) NP-40, and 1× Halt protease inhibitor) for 10 min with gentle agitation at 4°C.  
13 Nuclei were pelleted by centrifugation at 720×g for 5 min, and supernatant containing the  
14 cytosolic and membrane fraction was transferred to a new tube. Pelleted nuclei were resuspended  
15 in 200 μL of TBS containing 0.1% SDS and sonicated briefly to shear the genomic DNA and to  
16 solubilize nuclear proteins. Protein concentrations from the respective cytosolic and nuclear  
17 subcellular fractions were determined using the BCA assay.

18           Total protein (60 μg) was then combined with 4× LDS buffer including reducing agent,  
19 and heated to 90°C for 5 min to denature the proteins. Samples were then loaded onto a 10% bis-  
20 tris gel (NuPAGE, cat# NP0301BOX) and subjected to electrophoresis at 150 V for 35 min in 1×  
21 MES-SDS running buffer. Blot transfer onto a PVDF membrane was conducted at 30V for 90  
22 min at 4°C in NuPAGE transfer buffer containing 20% methanol. Following transfer, proteins



1 were visualized on the membrane using Ponceau S stain. Membranes were then blocked for 1 h  
2 at room temperature in blocking buffer comprised of TBST containing 3% non-fat dried milk.  
3 Membranes were then washed 3× 5 min with 1× TBST. Primary antibody solutions were  
4 prepared in antibody dilution buffer containing 2.5 mL 4% BSA, 250 μL 0.5% NaAzide, 7.5 mL  
5 TBST. Antibodies used in this analysis include anti-SDHC rabbit polyclonal IgG antibody (Santa  
6 Cruz Biotechnology, cat# sc-67256 (M-169), 1:500 dilution), anti-actin rabbit polyclonal IgG  
7 antibody (Sigma, cat# A2066, 1:500 dilution), anti-SIRT1 rabbit monoclonal IgG antibody (Cell  
8 Signaling Technology cat# 9475, 1:1000 dilution), anti-Phospho SIRT1 (Ser47) rabbit  
9 monoclonal IgG antibody (Cell Signaling Technology cat# 2314, 1:2000 dilution), anti-SIRT2  
10 rabbit monoclonal IgG antibody (Cell Signaling Technology cat# 12650, 1:1000 dilution), anti-  
11 SIRT3 rabbit monoclonal IgG antibody (Cell Signaling Technology cat# 5490, 1:1000 dilution),  
12 anti-SIRT5 rabbit monoclonal IgG antibody (Cell Signaling Technology cat# 8782, 1:1000  
13 dilution), anti-SIRT6 rabbit monoclonal IgG antibody (Cell Signaling Technology cat# 12486,  
14 1:1000 dilution), anti-SIRT7 rabbit monoclonal IgG antibody (Cell Signaling Technology cat#  
15 5360, 1:1000 dilution), anti-histone H3K27ac rabbit polyclonal IgG antibody (Novus Biologicals  
16 cat# NBP2-54615, 1:1000 dilution), anti-histone H4ac (H4K5ac, H4K8ac, H4K12ac, and  
17 H4K16ac) rabbit monoclonal IgG antibody (Abcam cat# ab177790, 1:20000 dilution), pan anti-  
18 propionyl rabbit polyclonal antibody (PTM Biolabs cat# PTM-201), pan anti-butyryl rabbit  
19 polyclonal antibody (PTM Biolabs cat# PTM-301), pan anti-malonyl rabbit polyclonal antibody  
20 (PTM Biolabs cat# PTM-901), pan anti-succinyl rabbit polyclonal antibody (PTM Biolabs cat#  
21 PTM-401), anti-histone H4 rabbit polyclonal IgG antibody (Abcam cat# ab7311, 1:1000  
22 dilution), and anti-histone H3 rabbit polyclonal IgG antibody (Abcam cat# ab1791, 1:1000  
23 dilution). Following dilution of antibodies into antibody dilution buffer, solutions were added to

1 the membranes and incubated at 4°C overnight with gentle shaking. The next day, solutions of  
2 primary antibodies were removed and membranes were washed 3× 5 minutes with 1× TBST at  
3 room temperature. Membranes were then incubated with HRP-conjugated anti-rabbit IgG  
4 secondary antibodies, diluted 1:10,000 into blocking buffer, for 1 h at room temperature.  
5 Membranes were then washed 3× 5 min with TBST to remove excess antibody, and exposed to  
6 ECL2 Western blot substrate for 5 min at room temperature prior to fluorescence image  
7 acquisition using a Typhoon fluorimeter.

## 8 **Transmission electron microscopy**

9 SDHC KO and control cells were fixed in EM fixative (4 % paraformaldehyde with 1%  
10 glutaraldehyde in phosphate buffered saline, pH 7.2), and placed into 2% low melting agar. Cells  
11 were then stained with 1% osmium tetroxide and 2% uranyl acetate, dehydrated through an  
12 ethanol series, and embedded into Spurr resin. Following a 24-h polymerization at 60°C, 0.1 μm  
13 ultra-thin sections were post-stained with lead citrate. Micrographs were acquired using a  
14 JEOL1400 Transmission Electron Microscope (Peabody, MA) operating at 80kV.

15

## 16 **CUT&RUN**

17 CUT&RUN sequencing was performed according to a published protocol (Skene et al.,  
18 2018). pA-MN fusion protein was gifted by Steven Henikoff (Fred Hutchinson Cancer Research  
19 Center, HHMI). Antibodies used for this experiment include anti-CTCF rabbit polyclonal  
20 antibody (Abcam cat# ab70303), anti-H3K4me3 rabbit polyclonal antibody (Abcam cat#  
21 ab8580), anti-H3K27ac rabbit polyclonal antibody (Active Motif cat# 39134), anti-H3K27me2  
22 rabbit polyclonal antibody (Abcam cat# 24684), pan anti-acetylsine rabbit polyclonal antibody

1 (PTM Biolabs cat# PTM-105), pan anti-propionyllysine rabbit polyclonal antibody (PTM  
2 Biolabs cat# PTM-201), and pan anti-butyryllysine rabbit polyclonal antibody (PTM Biolabs  
3 cat# PTM-301). Following recovery of eluted chromatin fragments CUT&RUN, library  
4 preparation was completed using the ThruPLEX DNA-seq 48S kit (Rubicon Genomics cat#  
5 R400427) and purified using AMPure XP beads (Beckman Coulter cat# A63880). 40 bar-coded  
6 libraries were multiplexed into a single lane on an Illumina HiSeq 4000 instrument and paired-  
7 end index sequencing performed to 150-bp read length. FASTQ reads were then aligned to the  
8 GRCm38/mm10 mouse reference genome using Bowtie2 on the Mayo Clinic Research  
9 Computing Services high performance Beowulf-style Linux-based cluster. Chromatin  
10 epigenomic state discovery was performed in ChromHMM (Ernst and Kellis, 2017). Data were  
11 deposited at GEO NCBI and are publically available under identifier GSE129956.

12

### 13 **ATAC-seq**

14 OMNI ATAC-seq was performed for 50,000 cells following the previously-published  
15 protocol (Corces et al., 2017). Amplified libraries were purified, and the size distribution of  
16 library DNA was determined by Fragment Analyzer (Advanced Analytical Technologies, IA)  
17 using a High Sensitivity NGS Fragment Analysis Kit (cat# DNF-486). Enrichment of accessible  
18 regions was determined by quantification of fold difference between positive and negative  
19 genomic loci using real-time PCR. Primer pairs for positive loci include AT-mDusp6-F: 5'-  
20 GGCTTATCCGGAGCGGAAAT and AT-mDusp6-R: 5'-GGCTGGAACAGGTTGTGTTG,  
21 and AT-mCh8-F: 5'-ACAAACATGCAGCAAGCCAC and AT-mCh8-R: 5'-  
22 ACTCACTGGCCAATCAAGGC-3'. Primers for negative locus amplification include AT-  
23 mVmn2r17-F: 5'-TCCCCTTTACTGTTTTCTCTAC and AT-mVmn2r17-R: 5'-

1 GGATTGATGAGGAAACAGCCTC. Four bar-coded libraries were multiplexed into a single  
2 lane on an Illumina HiSeq 4000 instrument and paired-end index sequencing performed to 50-bp  
3 read length. FASTQ reads were then aligned to the GRCm38/mm10 mouse reference genome  
4 using Bowtie2 on the Mayo Clinic Research Computing Services high performance Beowulf-  
5 style Linux-based cluster. ATAC-seq peak calling was performed in SeqMonk  
6 (<https://www.bioinformatics.babraham.ac.uk/projects/seqmonk/>) using the MACS peak calling  
7 algorithm (p-value cutoff: 1E-5), performing separate analyses for SDHC KO and control cell  
8 lines. Nucleosome positioning analysis of ATAC-seq data was performed using the  
9 NucleoATAC pipeline (Schep et al., 2015) for regions mapping to chromatin states determined  
10 by CUT&RUN/ChIP-seq and ChromHMM (Ernst and Kellis, 2017). Inter-dyad distances were  
11 calculated from the positions of called nucleosomes. Statistical testing for differences between  
12 groups was performed using a Wilcox rank-sum test. Inferred CTCF occupancy at CTCF binding  
13 sites was calculated using the ATACseqQC R package (Ou et al., 2018). Data were deposited at  
14 GEO NCBI and are publically available under identifier GSE129956.

15

## 16 **DNA template preparation and cloning**

17 Plasmid pET-15b-derived vectors for expression of *Homo sapiens* histones H2A  
18 (pHISPP/H2A), H2B (pHISPP/H2B), H3.1 (pHISPP/H3.1), and H4 (pHISPP/H4) were the gifts  
19 of Georges Mer. The sequence identifiers/internal plasmid codes for these constructs are  
20 NP\_003504.2, NP\_066402.2, NP\_003520.1, and NP\_001029249.1, respectively). Plasmid  
21 pJ2497 was used to create a transcription template for a T7 RNA polymerase transcription  
22 elongation assay in the presence or absence of reconstituted nucleosomes. This plasmid was  
23 propagated by standard methods in XL-10 Gold *E. coli* cells (Agilent) after heat shock

1 transformation. Single colonies were grown on LB agar plates containing carbenicillin (50  
2  $\mu\text{g/mL}$ ), transferred to 5 mL LB medium containing carbenicillin (50  $\mu\text{g/mL}$ ), and grown at 37°C  
3 for 16-20 h with continuous shaking at 225 rpm. The resulting culture was then used to seed 1 L  
4 of LB medium containing carbenicillin (50  $\mu\text{g/mL}$ ) and grown at 37°C for 16-20 h with  
5 continuous shaking at 225 rpm. Plasmid DNA was isolated by DNA maxi preparation kit  
6 (Qiagen # 12163) using 125 mL culture per tip-500 column. To generate the 624-bp transcription  
7 template for nucleosome reconstitution and T7 RNA polymerase transcription, plasmid pJ2497  
8 DNA was subjected to restriction endonuclease digestion with *PciI* (NEB # R0655) using 140 U  
9 enzyme per mg plasmid in NEB buffer 3.1 at 37°C for 10-14 h. The resulting digest was diluted  
10 to 300 ng/ $\mu\text{L}$ , subjected to electrophoresis through a 0.8% agarose gel for 2.5 h at ~6 V/cm, and  
11 the DNA band corresponding to the 624-bp transcription template was purified from the gel  
12 using a QIAquick Gel Extraction Kit (Qiagen #28704). The gel purified 624-bp transcription  
13 template DNA was further purified by ethanol precipitation involving addition of 0.1 volume of  
14 3 M NaOAc, pH 5.2 and 3 volumes of 100% ice cold ethanol with cooling at -80°C for 1 h. The  
15 ethanol precipitated DNA was then subjected to centrifugation at 14,000 x g for 15 min at 4°C  
16 and the supernatant was discarded. Pelleted DNA was then washed with 750  $\mu\text{L}$  70% EtOH and  
17 subjected to centrifugation as before. The dried DNA was typically resuspended in 50  $\mu\text{L}$  water.  
18 The concentration of purified 624-bp transcription template was determined by ultraviolet  
19 absorbance measured at 260 nm.

20

## 21 **Preparation of histone octamers**

22 Histone expression vectors were electroporated into BL21(DE3) cells and plated on LB  
23 agar plates containing carbenicillin (50  $\mu\text{g/mL}$ ). Transformed colonies were used to inoculate 1

1 L LB medium containing carbenicillin (50ug/mL). The resulting cultures were grown at 37°C  
2 with shaking at 225 rpm. When cultures reached an OD<sub>600</sub> of 0.6, IPTG was added to a final  
3 concentration of 0.5 mM and growth continued for an additional 3 h at the same conditions.  
4 Cultures were subjected to centrifugation at 6000 × g for 10 min in centrifuge Beckman Coulter  
5 Rotor JLA 8.1000 and LB media was removed.

6 Pelleted cells were resuspended in 10 mL ice-cold resuspension buffer (50 mM potassium  
7 phosphate pH 7.5, 300 mM NaCl, 1 mM phenylmethylsulfonyl fluoride, PMSF) and lysed by  
8 passage three times through a French press (AVESTIN Emulsi Flex-05) at 0.5 kPa. The lysate  
9 was subjected to centrifugation at 20,000 × g for 45 min at 4°C in (Beckman Coulter Rotor JA-  
10 25.50). The supernatant was discarded and the insoluble pellet, containing the histone proteins,  
11 was solubilized by the addition of 10 mL ice-cold binding buffer (50 mM potassium phosphate  
12 pH 7.5, 8 M urea, 300 mM NaCl, 5 mM imidazole, 1 mM PMFS). To aid in solubilization,  
13 histone proteins were then subjected to sonication at 30% power, three times at intervals of 30 s  
14 on ice (Branson sonifier) allowing 30-s incubation on ice between sonications to avoid  
15 overheating. The sonicated solution was then clarified by centrifugation at 20,000 g for 45 min at  
16 4°C (Beckman Coulter rotor JLA-16.250). The resulting supernatant was then allowed to pass by  
17 gravity flow over a column containing 4 mL packed Ni-NTA beads (Qiagen #30230) previously  
18 equilibrated in binding buffer, and the resulting flow-through was discarded. Columns were  
19 washed with 300 mL wash buffer (50 mM potassium phosphate pH 7.5, 6 M urea, 300 mM  
20 NaCl, 20 mM imidazole, 1 mM PMSF) using a Longer Pump (BT100-IL) at a flow rate of 3.5  
21 mL/min. Histone proteins were eluted from the column with 30 mL elution buffer (50 mM  
22 potassium phosphate pH 7.5, 6 M urea, 300 mM NaCl, 250 mM imidazole, 1 mM PMFS).

1 Concentrations of eluted histones were estimated by their absorbance at 280 nm using  
2 respective molecular weight and molar extinction coefficient values calculated using the Proto  
3 Param Tool (Wilkins et al., 1999). Concentration and quality of purified histones were validated  
4 empirically by electrophoresis through denaturing 10% Bis-Tris SDS polyacrylamide gels  
5 (NuPage #NPO363BOX) at 125 V for 2-3 h. Purified histone proteins in elution buffer were  
6 aliquoted, flash frozen on dry ice, and stored at -80°C.

7 Equimolar amounts of histones H2A, H2B, H3.1, H4 or (H4 K79 variants) were  
8 combined in varying volumes of elution buffer depending on their concentration. Dialysis steps  
9 were then performed at 4°C using 7 kDa MWCO SnakeSkin Dialysis tubing (Thermo  
10 SCIENTIFIC Lot#RF235431). Dialysis began against 2 L octamer refolding buffer 1 (10 mM  
11 Tris HCl pH 7.5, 4 M Urea, 2 M NaCl, 1 mM EDTA, 200 µM EDTA, 5 mM 2-mercaptoethanol)  
12 for 10-14 h. The concentration of urea in the refolding buffer was then decreased stepwise by 1  
13 M every 6 h in a series of subsequent dialysis steps until dialysis against buffer containing 1 M  
14 urea had been completed. Histones were then dialyzed against octamer refolding buffer 2 (10  
15 mM Tris HCl pH 7.5, 2 M NaCl, 1 mM EDTA, 200 µM EDTA, 5 mM 2-Mercaptoethanol, for  
16 10-14 h). Cleavage of His<sub>6</sub> affinity tags from refolded histone octamers was accomplished by  
17 treatment with PreScission Protease (Sigma, SAE0045) for 10-14 h at 4°C. Histones were then  
18 dialyzed against fresh octamer refolding buffer 2 for 10-14 h at 4°C. Affinity tag cleavage was  
19 confirmed by SDS polyacrylamide gel electrophoresis with an extended run time of 4h. Refolded  
20 histone octamers were concentrated to a final volume of 2 mL using a 10 kDa MWCO  
21 concentrator (Vivaspin 20 # VS2002) subjected to centrifugation at 3800 rpm (Jouan T 1354  
22 table top centrifuge).

1           Histone octamers were purified from other multimeric histone species by size exclusion  
2 chromatography using a GE ÄKTA FPLC instrument as described (Dyer et al., 2004). Fractions  
3 containing histone octamers were combined and concentrated as above to 1-2 mL. The  
4 concentration of histone octamer was estimated by absorbance at 280 nm using molar extinction  
5 coefficients calculated using the ProtParam tool (1). Octamers were stored at -20°C in 10 mM  
6 Tris-HCl pH 7.5, 50% glycerol, 2 M NaCl, 2 mM dithiothreitol.

7

8

9

#### 10 **Nucleosome core particle (NCP) reconstitution**

11           NCPs and a DNA-only control lacking histone octamer were reconstituted in parallel  
12 using stepwise dialysis of the purified 624-bp transcription template DNA and histone octamer at  
13 a molar ratio of 1:1.2, respectively. This was accomplished by dialysis of a solution consisting of  
14 6 µg transcription template DNA, 2 µg histone octamer (added last, with mixing) in a final  
15 volume of 20 µL solution containing 10 mM Tris-HCl pH 7.5, 2 M NaCl, 250 µM EDTA, 5 mM  
16 2-Mercaptoethanol. The DNA-only solution was made in parallel, excluding histone octamer.  
17 Equilibration and dialysis steps were performed at 4°C on an orbital shaker (Fisher Scientific  
18 Clinical Rotator cat 14-251-200) at 60 rpm using Slide-A-Lyzer MINI dialysis 3.5kD MWCO  
19 units (Thermo-Fisher) against dialysis buffers containing 10 mM Tris-HCl pH 7.5, 2 M NaCl,  
20 250 µM EDTA, 5 mM 2-mercaptoethanol for 30 min. Reconstitutions were then dialyzed at 4°C  
21 against dialysis buffers containing 1.2 M NaCl (4-6 h), 0.85 M NaCl (4-6 h), 0.65 M NaCl (10-  
22 14 h), 0.5 M NaCl (4-6 h) and 2.5 mM NaCl (4-6 h). Solutions were then subjected to



1 centrifugation at  $14,000 \times g$  for 15 min to pellet any precipitated material. The final  
2 concentration of transcription templates was estimated by the solution volume after dialysis  
3 assuming no loss of DNA.

4

#### 5 ***In vitro* chemical acylation of reconstituted NCPs**

6 Reconstituted nucleosomes were dialyzed into HEPES buffer to remove Tris-HCl. Acyl-  
7 CoA stocks were prepared by dissolving commercial powders (Sigma) in water at a final  
8 concentration of 20 mM. Stocks were generally prepared fresh. Stocks were added 1:1 to  
9 nucleosomes to 10 mM final concentration and allowed to react for 3 h at room temperature  
10 unless otherwise indicated. Treated reconstituted nucleosomal templates were then analyzed  
11 without further purification.

12

#### 13 **Electrophoretic mobility shift assay of nucleosome reconstitution**

14 A native 1.2% agarose electrophoretic mobility shift assay was used to estimate the  
15 extent of NCP reconstitution on the 624-bp DNA transcription template derive from plasmid  
16 pJ2497. For this assay, the reconstituted transcription template (~600 ng DNA) was first  
17 subjected to digestion with *Hind*III-HF (NEB #R3104; 30 U) in CutSmart buffer (NEB) at 37°C  
18 for 1 h to release 375-bp and 249-bp fragments, the latter of which carries the NCP. Samples  
19 were subjected to electrophoresis through a 1.2% native agarose gel for 2.5 h at ~6 V/cm. The  
20 gel was then stained for 40 min in a solution of 40 mM Tris-HCl, 20 mM acetic acid, 1mM  
21 EDTA containing ethidium bromide (0.75  $\mu\text{g/mL}$ ), and de-stained for 20 min in the same  
22 solution without ethidium bromide. Gel fluorescence was then detected on a Typhoon FLA 7000

1 imager using a 610-nm band-pass filter. The fraction of template fragment reconstituted with  
2 NCP was estimated using NIH ImageJ software.

3

#### 4 **T7 RNA polymerase transcription assay through reconstituted nucleosome**

5 *In vitro* transcription reactions to assay nucleosome stability were performed by mapping  
6 radiolabeled RNA transcription products of T7 RNA polymerase elongation into a reconstituted  
7 nucleosome. Initial *in vitro* transcription labeling reactions contained reconstituted transcription  
8 templates (125 ng DNA) in T7 RNA polymerase buffer including CTP and GTP (50  $\mu$ M each),  
9 and  $\alpha$ -[<sup>32</sup>P] ATP (800 Ci/mmol; 1  $\mu$ M), dithiothreitol (5  $\mu$ M), 1.5  $\mu$ L RNasin (N2111; 1 U/ $\mu$ L),  
10 and 2.5 U/ $\mu$ L T7 RNA polymerase (NEB M0251L), in a final volume of 50  $\mu$ L. Transcription  
11 was performed at room temperature for 10 min to radiolabel synthesized RNAs in the T-free  
12 template region. Samples (20  $\mu$ L) from the zero time point were collected from ice-cold  
13 reactions and added to an equal volume of deionized formamide and boiled at 90°C for 3 min. To  
14 initiate transcription elongation beyond the T-free template region, 25 mM NTPs were added to  
15 2 mM final concentration and transcription was allowed to proceed for 1 min at 4°C. Samples  
16 (20  $\mu$ L) were collected and terminated as above. A reference ladder of radiolabeled RNA  
17 transcripts was transcribed in the same manner using a mixture of templates individually  
18 digested by restriction enzymes PciI (NEB RO655,) NotI (NEB RO189), RsaI (NEB RO167),  
19 PmlI (NEB RO532), or XbaI (NEB RO145). Transcription reaction products were then subjected  
20 to electrophoresis through polyacrylamide gels (29:1 acrylamine:bisacrylamide) containing 7.5  
21 M urea at 12 W for 1 h. A 20% volume of 2.5 M sodium acetate was then added the lower  
22 electrophoresis reservoir with electrophoresis at 12 watts for an additional 45 min to enhance  
23 band separation. The gel was then dried and analyzed by storage phosphor imaging technology

1 on a Typhoon FLA 700 using a 650 nm laser and analyzed by NIH ImageJ software. RNAs  
2 corresponding to polymerase pausing or termination near the NCP were mapped by regression  
3 fitting of RNA markers.

4

## 5 **Quantitation of nucleosome reconstitution and transcription pausing/termination**

6 The fraction ( $N$ ) of DNA template reconstitution into nucleosomes was calculated (after  
7 background correction) by comparing the unshifted 601 ( $N$ ) and non-601 ( $T$ ) fragment intensities  
8 after nucleosome reconstitution to the corresponding values ( $N'$ ,  $T'$ ) in the absence of histone  
9 octamer:

$$10 \quad N = 1 - \left[ \frac{N+T}{(N'+T')} \right] \quad (1)$$

11 The fraction ( $B$ ) of transcription pause and termination was calculated by densitometry  
12 measurement (after background correction) of the full-length transcript band ( $F$ ) and the cluster  
13 of transcript pause bands ( $P$ ):

$$14 \quad B = P/(F + P) \quad (2)$$

15 The overall Nucleosome Obstacle Activity Per Reconstituted Template (NOAPRT)  
16 parameter was then calculated:

$$17 \quad NOAPRT = \frac{B}{N} = [P/(F + P)] / \left[ 1 - \left[ \frac{N+T}{(N'+T')} \right] \right] \quad (3)$$

18

19

20

## 1 **Nucleosome array reconstitution for optical tweezers**

2 Nucleosome arrays were assembled for optical tweezers experiments as described  
3 previously (McCauley et al., 2019). The DNA template was constructed around the 147-bp  
4 octamer positioning 601 sequence joined to a 60-bp non-specific linking sequence (Lowary and  
5 Widom, 1998). A linear 12× array of these 207-bp repeats was attached to linker DNA for  
6 optical tweezers experiments by insertion into pUC19 plasmid DNA. Endonuclease digestion  
7 (*BsaI*) linearized this construct and left a 4-bp overhang on both termini, filled in with DNA  
8 polymerase I (*Klenow*) and digoxigenin-labeled dTTP and biotinylated dATP (as well as dGTP  
9 and dCTP). The resulting construct consisted of a 12× array of 207-bp nucleosome sites, flanked  
10 by ~1350-bp non-positioning DNA linkers, and ended with a single biotin and digoxigenin each  
11 on opposing termini. DNA human octamers were assembled onto this construct by salt  
12 titration/dialysis (Muthurajan et al., 2011; Rogge et al., 2013). Essentially, a high concentration  
13 of DNA construct described above (~0.40 µg/µL) was incubated in high salt (10 mM Tris-HCl,  
14 pH 7.5, 1 mM EDTA and 2 M Na<sup>+</sup>). Human octamers (gift of the Lugar lab at the University of  
15 Colorado) were introduced into this solution in excess to ensure full array assembly. This  
16 solution was transferred into a 50 µL volume dialysis button and dialyzed (Hampton) against a  
17 series of decreasing salt solutions over ~ 30 h, facilitating nucleosome assembly at each  
18 positioning site. Arrays were stored in the final buffer (10 mM Tris-HCl, pH7.5, 1 mM EDTA  
19 and 2.5 mM Na<sup>+</sup>), and remained stable over several weeks at 4 °C. Reconstituted nucleosome  
20 arrays were assessed via atomic force microscopy (AFM) imaging and optical tweezers force  
21 microscopy (OT). OT experiments verify that 11-12 nucleosomes were disrupted by force and  
22 are described below. AFM experiments imaged arrays in liquid solutions to verify successful

1 reconstitution (McCauley et al., 2019). Nucleosomes are evident above a height threshold of 4-5  
2 nm, and clusters of 10-12 nucleosomes were seen in stable arrays.

3

#### 4 **Single molecule optical tweezers experiments**

5 The dual beam, single trap optical tweezers is well-known and widely-used (Chaurasiya  
6 et al., 2010; McCauley and Williams, 2009). Prior to experiment, reconstituted nucleosome  
7 arrays were diluted 10,000:1 into a solution of 10 mM HEPES, pH7.5 and 100 mM Na<sup>+</sup> (a final  
8 array concentration of 0.030 nM). An experiment began with the ‘catch’ of a single nucleosome  
9 array between a 2.1- $\mu$ m diameter anti-digoxygenin coated bead (*Spherotech*) and a 3.4- $\mu$ m  
10 diameter streptavidin-coated bead (*Bangs Labs*). The smaller bead was pulled onto a  
11 micropipette tip (*WPI*) within a custom-built flow cell. The larger bead was held at the focus an  
12 optical trap of finite stiffness. Movement of the cell altered the tension in the array, which is  
13 measured at each step. Experiments typically began at low extension and increased stepwise at a  
14 nearly fixed loading rate of 10 pN/s, followed by a stepwise decrease in extension.

15 Arrays were diluted and experiments were performed at room temperature (~22 °C).  
16 Control experiments stretched arrays alone and though some free octamers were present in  
17 solution, there was no evidence of non-specific binding to the long DNA handles. For the  
18 control, arrays with  $N > 10$  observed disruptions were selected. Diluted array samples were also  
19 separately incubated with 2.0 mM acetyl-CoA, propionyl-CoA, butyryl-CoA, malonyl-CoA and  
20 succinyl-CoA at 30 °C for 3 h. Solutions of incubated arrays were then introduced directly into  
21 the optical tweezers experiment (22 °C) and tethered for cycles of extension and release. Arrays  
22 with  $N > 7$  nucleosome disruptions were retained. A further control was performed where diluted

1 arrays were incubated at 30 °C but with no CoA present, to test against the known effects of  
2 disruption by exposure to temperature in a dilute solution (Hazan et al., 2015).

3

#### 4 **Polymer elasticity modeling**

5 The elastic response of double-stranded DNA has been well-studied under a variety of  
6 conditions. With the application of an external tension, the end-to-end distance of a flexible  
7 worm-like chain will respond as (Bouchiat et al., 1999; Chaurasiya et al., 2010; McCauley et al.,  
8 2013; McCauley and Williams, 2009),

9

$$10 \quad b(F) = B \left[ 1 - \frac{1}{2} \left( \frac{k_B T}{PF} \right)^{1/2} + \frac{F}{S} \right] \quad (4)$$

11 Adjustable parameters include the contour length  $B$ , the elastic modulus  $S$  and the persistence  
12 length  $P$ , a key measure of chain flexibility (Chaurasiya et al., 2010; McCauley et al., 2013;  
13 Murugesapillai et al., 2014). There is known variation of these parameters upon construct length  
14 (Seol et al., 2007) and for these constructs (without nucleosomes) fitted values are  $B = 0.340 \pm$   
15  $0.001$  nm/bp (or  $1782 \pm 5$  nm),  $S = 800 \pm 100$  pN and  $P = 40 \pm 2$  nm. Thus, the contour length  
16 for a fully-reconstituted construct would reasonably be  $(1782 - 78 \times N)$  nm, where  $N$  is the  
17 number of nucleosomes remaining in the array (as defined in the main text).

18 DNA constructs (nucleosome free) were incubated with both acetyl- and succinyl-CoA.  
19 Fits to the polymer elasticity model described above quantify ligand binding that are known to  
20 alter either the length of the double strand or the local flexibility (Chaurasiya et al., 2010;  
21 McCauley et al., 2019; McCauley et al., 2013). Non-linear fits are written into custom

1 LabWindows CVI code which incorporated a ML Numerical Recipes algorithm ( $\chi^2_{\nu} \sim 1$  for these  
2 fits) (Press et al., 2002).

3

#### 4 **Kinetics of nucleosome unwinding**

5 As DNA wrapped around a single nucleosome is subjected to increasing tension, there is  
6 an increasing probability that the nucleosome will be disrupted. Arrays of multiple nucleosomes  
7 will show disruptions with increasing force as the probability of observing any individual  
8 disruption increases with the decreasing number left in the array,  $N$  (McCauley et al., 2019),

$$9 \quad F = \frac{k_B T}{x^\ddagger} \cdot \ln \left[ \frac{dF}{dt} \cdot \frac{x^\ddagger}{k_B T \cdot k_o \cdot N} \right] \quad (5)$$

10 The loading rate,  $dF/dt$ , is constant over all the experiments here ( $\sim 10$  pN/s). This kinetic  
11 information allows us to characterize the transition barrier for strong site ripping. Specifically,  
12 we quantify the DNA extension to the transition state ( $x^\ddagger$ ) and the natural (zero force) rate of  
13 unwinding ( $k_o$ ) are fitting parameters. However, for nucleosome arrays, the energy landscape is  
14 complicated by many likely sub-transition states, so these two parameters were fitted only for the  
15 control set (which found  $x^\ddagger = 0.47 \pm 0.01$  nm, or  $1.38 \pm 0.03$  base pairs), then held fixed for the  
16 remaining experiments ( $\chi^2_{\nu} \sim 1$  for all fits).

17

#### 18 **Easy Hi-C**

19 Easy Hi-C was performed as previously reported using  $1 \times 10^6$  cells as input (Lu et al.,  
20 2018). Library preparation using 50 ng recovered DNA was completed using the ThruPLEX  
21 DNA-seq 48S kit (Rubicon Genomics cat# R400427) and purified using AMPure XP beads

1 (Beckman Coulter cat# A63880). Four bar-coded libraries were multiplexed into a single lane on  
2 an Illumina HiSeq 4000 instrument and paired end index sequencing performed to 150-bp read  
3 length. FASTQ reads were then analyzed on the Mayo Clinic Research Computing Services high  
4 performance Linux cluster using the Juicer Hi-C analysis pipeline (Durand et al., 2016). All  
5 downstream analyses employed Knight-Ruiz matrix balancing for contact map normalization  
6 (Knight and Ruiz, 2013). Analysis of eHi-C dataset variability between biological replicates was  
7 performed using 1-Mb resolution contact matrices in HiCRep (Yang et al., 2017). Eigenvectors  
8 used to delineate chromatin compartments at 250-Kb resolution were calculated in Juicer tools  
9 (Durand et al., 2016). Identities of A and B compartments were determined by assessing  
10 correlation between compartment eigenvectors and binned ATAC-seq signal. TAD calling using  
11 insulation square analysis and calculation of TAD boundary strength was performed as  
12 previously described on a 10-Kbp resolution contact matrix using a sliding 500 Kbp  $\times$  500 Kbp  
13 (50 bin  $\times$  50 bin) (Crane et al., 2015). TADs retained for analysis have mean boundary strength  
14  $> 0.5$  across all datasets. TADs with differential boundary strength were those identified to have  
15 absolute  $\log_2(\text{fold-change}) > 1$ . Data were deposited at GEO NCBI and are publically available  
16 under identifier GSE129956.

17

## 18 **Cell cycle analysis**

19 SDHC KO and control cells were dissociated by trypsinization, resuspended in media,  
20 diluted to  $1 \times 10^6$  cells/mL, subjected to centrifugation at  $500 \times g$  for 5 min, resuspended in PBS  
21 containing 2% formaldehyde, and rocked for 20 min at room temperature to fix. The  
22 formaldehyde reaction was quenched with the addition of glycine to 127 mM final concentration  
23 and incubating on ice for 5 min. Cells were subjected to centrifugation at  $500 \times g$  for 5 min,



1 washed 2× with PBS, resuspended in permeabilization buffer (10 mM Tris-HCl (pH 8.0), 10 mM  
2 NaCl, 0.2% IGEPAL CA-630), and incubated on ice for 30 min to permeabilize. Cells were then  
3 centrifuged at 500×g for 5 min, resuspended in blocking buffer (PBS containing 5% FBS and  
4 0.1% Tween-20), and incubated at room temperature for 1 h. Cells were then subjected to  
5 centrifugation at 500×g for 5 min, resuspended in blocking buffer containing rabbit anti-Geminin  
6 polyclonal antibody (Abcam cat# ab175799) at 1:400 dilution, and incubated at 4°C with gentle  
7 agitation for 1 h. Cells were then subjected to centrifugation at 500×g for 5 min, washed with  
8 blocking buffer, and resuspended in blocking buffer containing goat anti-rabbit IgG (H+L) Alexa  
9 Fluor Plus 488-conjugated antibody (Invitrogen cat # A32731) at 1:200 dilution, and incubated at  
10 4°C with gentle agitation for 30 min. Cells were then subjected to centrifugation at 500×g for 5  
11 min, washed with blocking buffer, resuspended in PBS containing 0.1% TX-100 and 10 µg/mL  
12 DAPI, and incubated on ice for 30 min. Cells were then subjected to centrifugation at 500×g for  
13 5 min and resuspended in PBS prior to flow cytometry analysis of DAPI and Geminin.

14

### 15 **Fluorescence recovery after photobleaching**

16 mEmerald-STAG2-C-18 and mEmerald-Rad21-C-18 were gifts from Michael Davidson  
17 (Addgene plasmid # 54259 and 54247). Plasmids were propagated in DH5alpha with Kanamycin  
18 selection and isolated using Qiagen Plasmid Maxi kit (Qiagen cat # 12163). SDHC KO and  
19 control iMEF cells were seeded at 100,000 cells per 2 mL media into 30 mm plates under the  
20 standard cell culture conditions specified above. The next day, mEmerald-STAG2-C-18 or  
21 mEmerald-Rad21-C-18 plasmids were diluted into Opti-MEM, combined with diluted  
22 Lipofectamine 2000 reagent (Invitrogen cat # 11668030), and transfected into cells. The media  
23 was changed 4 h later and the plate was returned to the incubator overnight. The next day, cells

1 were analyzed by confocal microscope using a 488 nm laser and detection wavelengths of 493-  
2 598 nm in a fluorescence recovery after photo bleaching (FRAP) experiment utilizing a circular  
3 bleach area with 1  $\mu$ M radius. Intensity measurements for regions of interest (ROIs) including  
4 intracellular bleached area, intracellular non-bleached area, and extracellular background area  
5 were captured at 1 s time intervals for 120 s. Extracellular background was subtracted from  
6 bleached and non-bleached intracellular ROIs, and then intensity ratio of intracellular bleached  
7 ROI to intracellular non-bleached ROI was calculated as a function of time to yield a normalized  
8 FRAP curve.

9

#### 10 **Proteomic analysis of cohesin subunit acyl PTMs**

11 SILAC heavy and light DMEM media were prepared using the SILAC Protein  
12 Quantitation Kit (LysC) DMEM (Thermo Scientific cat # A33969) and L-Arginine,  $^{13}\text{C}_6$  for  
13 SILAC (Thermo Scientific cat # 88210), with the addition of glutamine and pyruvate. Control  
14 cells were grown for 10 doublings in SILAC heavy media containing  $^{13}\text{C}_6$  L-Lysine and  $^{13}\text{C}_6$  L-  
15 Arginine, and SDHC KO cells were grown in SILAC light media containing  $^{12}\text{C}_6$  L-Lysine and  
16  $^{12}\text{C}_6$  L-Arginine. 20 million cells from each line were trypsinized and washed 2 $\times$  with cold PBS.  
17 Cells were lysed with 1500  $\mu$ L cold lysis buffer containing 50 mM Tris-HCl, pH 7.4, 150 mM  
18 NaCl, 1% TX-100, and 1X protease inhibitor cocktail. Lysates were subjected to centrifugation  
19 at 15,000 rpm for 5 min at 4  $^{\circ}$ C and the supernatant transferred to a new tube. Protein  
20 concentration was estimated by BCA assay and lysates were diluted to a concentration of 1.5  
21 mg/mL in 3 mL total volume.  $\text{MgCl}_2$  was added to 0.4 mM concentration and 10  $\mu$ L DNase I (5  
22 mg/mL) was added. Tubes were incubated at room temperature for 10 min to degrade genomic  
23 DNA. EDTA was added to final concentration of 5 mM and tubes were placed on ice to stop

1 nuclease reaction. Samples were split into three technical replicates, combined with 25  $\mu$ L of  
2 pre-washed protein A/G magnetic beads (Pierce cat # 88803) and 1  $\mu$ g of non-specific rabbit IgG  
3 antibody, and rotated at 4 °C for 1 h. Samples were placed on magnet to separate beads and  
4 supernatant containing pre-cleared lysate transferred to a new tube. Rabbit anti-SMC3 antibody  
5 (8  $\mu$ g; Abcam cat # ab9263) was added and tubes were again rotated at 4 °C for 2 h. 25  $\mu$ L of  
6 washed protein A/G magnetic beads was added and tubes were rotated at 4 °C overnight to  
7 capture antibody-bound cohesin. Tubes were placed on a magnet to phase separate, and the  
8 beads were washed 2 $\times$  with lysis buffer. Beads were resuspended in 50  $\mu$ L of 1 $\times$  LDS loading  
9 buffer containing sample reducing agent and heated to 95 °C for 5 min to elute bound proteins.  
10 20  $\mu$ L eluted sample was then subjected to electrophoresis on a 10% SDS-PAGE gel for 1 h at  
11 130 V. The gel was then stained in Coomassie solution and de-stained in methanol-acetic acid  
12 solution. Bands corresponding to the expected size of cohesin subunits were excised using a  
13 clean razor blade. The bands with light and heavy labeled proteins were excised and pooled  
14 roughly equally for combined in-gel digestion by trypsin (Promega, Madison, WI) based on a  
15 previously described protocol (Li et al., 2019). Extracted peptides were desalted and subject to  
16 LC-MS/MS analysis. Peptides were separated on an in-house packed microcapillary C18 column  
17 and eluted with HPLC gradient of 1% to 30% HPLC buffer A (0.1% formic acid in water) in  
18 HPLC buffer B (0.1% formic acid in acetonitrile) from 5 min to 45 min. Peptide ions were  
19 acquired by Orbitrap Lumos Hybrid mass spectrometer (ThermoFisher, Waltham, MA).  
20 Precursor ions were analyzed in Orbitrap with a resolution of 50,000 at 200 m/z. Dynamic  
21 exclusion was enabled. Peptide ions were fragmented through high-energy collision dissociation  
22 (HCD) and analyzed by ion trap.

1 Three biological replicate analysis of SILAC-labeled Cohesin complex proteins were  
2 searched with Maxquant software against the protein database containing Cohesin proteins and  
3 known contaminants. Common lysine acylations, including acetylation, succinylation,  
4 malonylation, propionylation, butyrylation, crotonylation, glutarylation, were specified as  
5 variable modifications in addition to oxidation on methionine and acetylation on protein N-  
6 terminus. Carbamidomethylation on Cys was specified as the fixed modification. Up to four  
7 missed cleavage in trypsin digestion were allowed. Precursor ion mass tolerance was set to 4.5  
8 ppm and fragment ion mass tolerance was set to 0.6 Da. Protein quantification considered  
9 unmodified peptides and only peptides with oxidation on Met or acetylation on protein N-  
10 terminus. A false discovery rate of 1% was applied for protein, peptide and modification site  
11 identifications. Identification of modified peptides were also subject to a cutoff Andromeda score  
12 of 40. Quantification of PTM sites included the normalization of SILAC ratios of PTM sites with  
13 the corresponding protein SILAC ratios.

14 For PTM sites that could not be quantified by SILAC (missing heavy or light isotope-  
15 labeled peptide ions), we provided an estimation of the SILAC ratios based on a previous  
16 described strategy for data analysis with missing values (Ogden, 2010). Based on this strategy,  
17 we first estimated the MS detection limit (D) when the target peptide was eluting at its  
18 chromatographic peak. The MS detection limit (D) was calculated as the average intensity of the  
19 lowest one-third of the MS signals in the vicinity ( $\pm 100$  m/z) of the detectable SILAC peptide  
20 ion. Then, we assigned an arbitrary value of  $0.707 \times D$  as the missing intensity of the other SILAC  
21 peptide ion. As the MS intensity of the detectable SILAC peptide ion was known, this would  
22 allow us to estimate the upper or lower limit of the SILAC ratios for the unquantifiable PTM  
23 sites.

1

## 2 **Multiplexed staining and volumetric fluorescence imaging of cell nuclei**

3 SDHC KO and control cells were plated at density of  $1.6 \times 10^5$  cells per 2 mL media into  
4 poly-D-lysine coated 35-mm dishes (MatTek cat# P35GC-0-10-C). For drug treatments, 10  $\mu$ M  
5 C646 (Sigma Aldrich cat# SML0002) (or DMSO vehicle), 100  $\mu$ M MB-3 (Sigma Aldrich cat#  
6 M2449) (or DMSO vehicle), 1  $\mu$ M oligomycin A (Sigma Aldrich cat# 75351) (or DMSO  
7 vehicle) or 20  $\mu$ M EX-527 (Sigma Aldrich cat# E7034) (or EtOH vehicle) was added for the  
8 specified length of time. Media was then aspirated from plates and cells were washed with 1 mL  
9 room temperature PBS. Cells were then fixed with 3.7% formaldehyde solution in PBS for 20  
10 min at room temperature, permeabilized with PBS containing 0.1% Triton X-100 at room  
11 temperature for 15 min, and blocked with PBS containing 10% FBS for 30 min. Cells were then  
12 immunostained in blocking buffer containing 1:200 diluted mouse anti-H3K27me3 (Abcam cat#  
13 ab6002) and 1:500 diluted rabbit anti-H3K27ac (Novus Biologicals cat# NBP2-54615) with  
14 gentle agitation at room temperature for 60 min. Antibodies were then aspirated and cells were  
15 washed 3 $\times$  with PBS for 5 min. Solutions of secondary antibodies were prepared in blocking  
16 buffer containing goat anti-rabbit IgG Alexa Fluor 488 (Invitrogen cat# A-11008) and goat anti-  
17 mouse IgG Alexa Fluor 594 (Invitrogen cat# A32740), and added to cells for 30 min with gentle  
18 agitation, protecting from light. Cells were then washed 2 $\times$  with PBS and stained with 5 $\mu$ g/mL  
19 DAPI in PBS for 5 min at room temperature. Cells were then washed 2 $\times$  with PBS and imaged  
20 with a Zeiss LSM 780 confocal microscope using a 100 $\times$  oil-immersion objective in z-stacked  
21 mode with 0.31  $\mu$ m slice thickness and 0.14  $\mu$ m horizontal pixel dimension. The DAPI channels  
22 from individual SDHC KO and control image stacks were used to generate a single three-state  
23 pixel classification machine learning model (extranuclear, nucleoplasm, and puncta) for

1 performance of automated nucleus segmentation using Trainable Weka Segmentation (Arganda-  
2 Carreras et al., 2017). CellProfiler 3.0 (McQuin et al., 2018) was then used to perform  
3 automated image analysis of immunofluorescence patterns and for measurement of  
4 heterochromatin volumes.

5

6

7

8

9

# 1 **Supplemental item titles**

2 **Dataset S1. Polar metabolomics data.xlsx**

3 **Dataset S2. ATAC-seq read mapping.xlsx**

4 **Movie S1. FRAP mEmerald-RAD21 control.mp4**

5 **Movie S2. FRAP mEmerald-RAD21 SDHC KO.mp4**

6 **Movie S3. FRAP mEmerald-STAG2 control.mp4**

7 **Movie S4. FRAP mEmerald-STAG2 SDHC KO.mp4**

## 1 References

- 2 Anderson, J.D., Lowary, P.T., and Widom, J. (2001). Effects of histone acetylation on the  
3 equilibrium accessibility of nucleosomal DNA target sites. *Journal of molecular biology* 307,  
4 977-985.
- 5 Arganda-Carreras, I., Kaynig, V., Rueden, C., Eliceiri, K.W., Schindelin, J., Cardona, A., and  
6 Sebastian Seung, H. (2017). Trainable Weka Segmentation: a machine learning tool for  
7 microscopy pixel classification. *Bioinformatics* 33, 2424-2426.
- 8 Audano, M., Pedretti, S., Crestani, M., Caruso, D., De Fabiani, E., and Mitro, N. (2019).  
9 Mitochondrial dysfunction increases fatty acid beta-oxidation and translates into impaired  
10 neuroblast maturation. *FEBS Lett* 593, 3173-3189.
- 11 Bagul, P.K., Deepthi, N., Sultana, R., and Banerjee, S.K. (2015). Resveratrol ameliorates cardiac  
12 oxidative stress in diabetes through deacetylation of NFkB-p65 and histone 3. *J Nutr Biochem*  
13 26, 1298-1307.
- 14 Bancos, I., Bida, J.P., Tian, D., Bundrick, M., John, K., Holte, M.N., Her, Y.F., Evans, D.,  
15 Saenz, D.T., Poeschla, E.M., *et al.* (2013). High-throughput screening for growth inhibitors using  
16 a yeast model of familial paraganglioma. *PLoS One* 8, e56827.
- 17 Barupal, D.K., and Fiehn, O. (2017). Chemical Similarity Enrichment Analysis (ChemRICH) as  
18 alternative to biochemical pathway mapping for metabolomic datasets. *Sci Rep* 7, 14567.
- 19 Bauerschmidt, C., Woodcock, M., Stevens, D.L., Hill, M.A., Rothkamm, K., and Helleday, T.  
20 (2011). Cohesin phosphorylation and mobility of SMC1 at ionizing radiation-induced DNA  
21 double-strand breaks in human cells. *Exp Cell Res* 317, 330-337.
- 22 Bintu, L., Ishibashi, T., Dangkulwanich, M., Wu, Y.Y., Lubkowska, L., Kashlev, M., and  
23 Bustamante, C. (2012). Nucleosomal Elements that Control the Topography of the Barrier to  
24 Transcription. *Cell* 151, 738-749.
- 25 Bouchiat, C., Wang, M.D., Allemand, J.F., Strick, T., Block, S.M., and Croquette, V. (1999).  
26 Estimating the persistence length of a Worm-Like Chain molecule from Force-Extension  
27 measurements. *Biophysical Journal* 76, 409-413.
- 28 Brennan, C.W., Verhaak, R.G., McKenna, A., Campos, B., Noushmehr, H., Salama, S.R., Zheng,  
29 S., Chakravarty, D., Sanborn, J.Z., Berman, S.H., *et al.* (2013). The somatic genomic landscape  
30 of glioblastoma. *Cell* 155, 462-477.
- 31 Brower-Toland, B., Wacker, D.A., Fulbright, R.M., Lis, J.T., Kraus, W.L., and Wang, M.D.  
32 (2005a). Specific contributions of histone tails and their acetylation to the mechanical stability of  
33 nucleosomes. *J Mol Biol* 346, 135-146.
- 34 Brower-Toland, B., Wacker, D.A., Fulbright, R.M., Lis, J.T., Kraus, W.L., and Wang, M.D.  
35 (2005b). Specific contributions of histone tails and their acetylation to the mechanical stability of  
36 nucleosomes. *Journal of molecular biology* 346, 135-146.
- 37 Brower-Toland, B.D., Smith, C.L., Yeh, R.C., Lis, J.T., Peterson, C.L., and Wang, M.D. (2002).  
38 Mechanical disruption of individual nucleosomes reveals a reversible multistage release of DNA.  
39 *Proc Natl Acad Sci U S A* 99, 1960-1965.
- 40 Bysani, M., Agren, R., Davegarth, C., Volkov, P., Ronn, T., Unneberg, P., Bacos, K., and Ling,  
41 C. (2019). ATAC-seq reveals alterations in open chromatin in pancreatic islets from subjects  
42 with type 2 diabetes. *Sci Rep-Uk* 9.



- 1 Caramazza, D., Lasho, T.L., Finke, C.M., Gangat, N., Dingli, D., Knudson, R.A., Siragusa, S.,  
2 Hanson, C.A., Pardanani, A., Ketterling, R.P., *et al.* (2010). IDH mutations and trisomy 8 in  
3 myelodysplastic syndromes and acute myeloid leukemia. *Leukemia* 24, 2120-2122.
- 4 Chang, H.W., Shaytan, A.K., Hsieh, F.K., Kulaeva, O.I., Kirpichnikov, M.P., and Studitsky,  
5 V.M. (2013). Structural Analysis of the Key Intermediate Formed during Transcription through a  
6 Nucleosome. *Trends Cell Mol Biol* 8, 13-23.
- 7 Chaurasiya, K.R., Paramanathan, T., McCauley, M.J., and Williams, M.C. (2010). Biophysical  
8 characterization of DNA binding from single molecule force measurements. *Physics of Life*  
9 *Reviews* 7, 299-341.
- 10 Chen, Q., Younus, M., Thompson, J., Hu, Y., Hollander, J.M., and Lesnefsky, E.J. (2018).  
11 Intermediary metabolism and fatty acid oxidation: novel targets of electron transport chain-  
12 driven injury during ischemia and reperfusion. *Am J Physiol Heart Circ Physiol* 314, H787-  
13 H795.
- 14 Chereji, R.V., and Clark, D.J. (2018). Major Determinants of Nucleosome Positioning.  
15 *Biophysical Journal* 114, 2279-2289.
- 16 Clapier, C.R., Iwasa, J., Cairns, B.R., and Peterson, C.L. (2017). Mechanisms of action and  
17 regulation of ATP-dependent chromatin-remodelling complexes. *Nat Rev Mol Cell Biol* 18, 407-  
18 422.
- 19 Corces, M.R., Granja, J.M., Shams, S., Louie, B.H., Seoane, J.A., Zhou, W.D., Silva, T.C.,  
20 Groeneveld, C., Wong, C.K., Cho, S.W., *et al.* (2018). The chromatin accessibility landscape of  
21 primary human cancers. *Science* 362, 420-+.
- 22 Corces, M.R., Trevino, A.E., Hamilton, E.G., Greenside, P.G., Sinnott-Armstrong, N.A.,  
23 Vesuna, S., Satpathy, A.T., Rubin, A.J., Montine, K.S., Wu, B., *et al.* (2017). An improved  
24 ATAC-seq protocol reduces background and enables interrogation of frozen tissues. *Nat*  
25 *Methods* 14, 959-962.
- 26 Costantino, S., Paneni, F., Battista, R., Castello, L., Capretti, G., Chiandotto, S., Tanese, L.,  
27 Russo, G., Pitocco, D., Lanza, G.A., *et al.* (2017). Impact of Glycemic Variability on Chromatin  
28 Remodeling, Oxidative Stress, and Endothelial Dysfunction in Patients With Type 2 Diabetes  
29 and With Target HbA(1c) Levels. *Diabetes* 66, 2472-2482.
- 30 Crane, E., Bian, Q., McCord, R.P., Lajoie, B.R., Wheeler, B.S., Ralston, E.J., Uzawa, S., Dekker,  
31 J., and Meyer, B.J. (2015). Condensin-driven remodelling of X chromosome topology during  
32 dosage compensation. *Nature* 523, 240-244.
- 33 Dai, Z., Ramesh, V., and Locasale, J.W. (2020). The evolving metabolic landscape of chromatin  
34 biology and epigenetics. *Nat Rev Genet.*
- 35 Dion, M.F., Altschuler, S.J., Wu, L.F., and Rando, O.J. (2005). Genomic characterization reveals  
36 a simple histone H4 acetylation code. *Proc Natl Acad Sci U S A* 102, 5501-5506.
- 37 Durand, N.C., Shamim, M.S., Machol, I., Rao, S.S., Huntley, M.H., Lander, E.S., and Aiden,  
38 E.L. (2016). Juicer Provides a One-Click System for Analyzing Loop-Resolution Hi-C  
39 Experiments. *Cell Syst* 3, 95-98.
- 40 Dyer, P.N., Edayathumangalam, R.S., White, C.L., Bao, Y., Chakravarthy, S., Muthurajan,  
41 U.M., and Luger, K. (2004). Reconstitution of nucleosome core particles from recombinant  
42 histones and DNA. *Methods Enzymol* 375, 23-44.
- 43 Ernst, J., and Kellis, M. (2017). Chromatin-state discovery and genome annotation with  
44 ChromHMM. *Nat Protoc* 12, 2478-2492.
- 45 Etchegaray, J.P., and Mostoslavsky, R. (2016). Interplay between Metabolism and Epigenetics:  
46 A Nuclear Adaptation to Environmental Changes. *Mol Cell* 62, 695-711.

- 1 Fenley, A.T., Adams, D.A., and Onufriev, A.V. (2010). Charge state of the globular histone core  
2 controls stability of the nucleosome. *Biophys J* 99, 1577-1585.
- 3 Fenley, A.T., Anandkrishnan, R., Kidane, Y.H., and Onufriev, A.V. (2018). Modulation of  
4 nucleosomal DNA accessibility via charge-altering post-translational modifications in histone  
5 core. *Epigenetics Chromatin* 11, 11.
- 6 Fishbein, L., Leshchiner, I., Walter, V., Danilova, L., Robertson, A.G., Johnson, A.R.,  
7 Lichtenberg, T.M., Murray, B.A., Ghayee, H.K., Else, T., *et al.* (2017). Comprehensive  
8 Molecular Characterization of Pheochromocytoma and Paraganglioma. *Cancer Cell* 31, 181-193.
- 9 Flavahan, W.A., Drier, Y., Johnstone, S.E., Hemming, M.L., Tarjan, D.R., Hegazi, E., Shareef,  
10 S.J., Javed, N.M., Raut, C.P., Eschle, B.K., *et al.* (2019). Altered chromosomal topology drives  
11 oncogenic programs in SDH-deficient GISTs. *Nature* 575, 229-+.
- 12 Flavahan, W.A., Drier, Y., Liau, B.B., Gillespie, S.M., Venteicher, A.S., Stemmer-Rachamimov,  
13 A.O., Suva, M.L., and Bernstein, B.E. (2016). Insulator dysfunction and oncogene activation in  
14 IDH mutant gliomas. *Nature* 529, 110-+.
- 15 Gibson, B.A., Doolittle, L.K., Jensen, L.E., Gamarra, N., Redding, S., and Rosen, M.K. (2019a).  
16 Organization and Regulation of Chromatin by Liquid-Liquid Phase Separation. *bioRxiv*.
- 17 Gibson, B.A., Doolittle, L.K., Schneider, M.W.G., Jensen, L.E., Gamarra, N., Henry, L., Gerlich,  
18 D.W., Redding, S., and Rosen, M.K. (2019b). Organization of Chromatin by Intrinsic and  
19 Regulated Phase Separation. *Cell* 179, 470-484 e421.
- 20 Gill, A.J., Chou, A., Vilain, R., Clarkson, A., Lui, M., Jin, R., Tobias, V., Samra, J., Goldstein,  
21 D., Smith, C., *et al.* (2010). Immunohistochemistry for SDHB divides gastrointestinal stromal  
22 tumors (GISTs) into 2 distinct types. *Am J Surg Pathol* 34, 636-644.
- 23 Gill, A.J., Chou, A., Vilain, R.E., and Clifton-Bligh, R.J. (2011). "Pediatric-type" gastrointestinal  
24 stromal tumors are SDHB negative ("type 2") GISTs. *Am J Surg Pathol* 35, 1245-1247; author  
25 reply 1247-1248.
- 26 Gorisch, S.M., Wachsmuth, M., Toth, K.F., Lichter, P., and Rippe, K. (2005). Histone  
27 acetylation increases chromatin accessibility. *Journal of Cell Science* 118, 5825-5834.
- 28 Hansen, A.S., Cattoglio, C., Darzacq, X., and Tjian, R. (2018). Recent evidence that TADs and  
29 chromatin loops are dynamic structures. *Nucleus-Phila* 9, 20-32.
- 30 Hansen, A.S., Pustova, I., Cattoglio, C., Tjian, R., and Darzacq, X. (2017). CTCF and cohesin  
31 regulate chromatin loop stability with distinct dynamics. *Elife* 6.
- 32 Hashimoto, H., Wang, D.X., Horton, J.R., Zhang, X., Corces, V.G., and Cheng, X.D. (2017).  
33 Structural Basis for the Versatile and Methylation-Dependent Binding of CTCF to DNA. *Mol*  
34 *Cell* 66, 711-+.
- 35 Hassa, P.O., Haenni, S.S., Elser, M., and Hottiger, M.O. (2006). Nuclear ADP-ribosylation  
36 reactions in mammalian cells: where are we today and where are we going? *Microbiol Mol Biol*  
37 *Rev* 70, 789-829.
- 38 Hazan, N.P., Tomov, T.E., Tsukanov, R., Liber, M., Berger, Y., Masoud, R., Toth, K.,  
39 Langowski, J., and Nir, E. (2015). Nucleosome Core Particle Disassembly and Assembly  
40 Kinetics Studied Using Single-Molecule Fluorescence. *Biophys J* 109, 1676-1685.
- 41 Hebbes, T.R., Clayton, A.L., Thorne, A.W., and Crane-Robinson, C. (1994). Core histone  
42 hyperacetylation co-maps with generalized DNase I sensitivity in the chicken beta-globin  
43 chromosomal domain. *Embo J* 13, 1823-1830.
- 44 Jost, D., Carrivain, P., Cavalli, G., and Vaillant, C. (2014). Modeling epigenome folding:  
45 formation and dynamics of topologically associated chromatin domains. *Nucleic Acids Res* 42,  
46 9553-9561.

- 1 Kawasumi, R., Abe, T., Arakawa, H., Garre, M., Hirota, K., and Branzei, D. (2017). ESCO1/2's  
2 roles in chromosome structure and interphase chromatin organization. *Genes Dev* *31*, 2136-2150.
- 3 Kebede, A.F., Nieborak, A., Shahidian, L.Z., Le Gras, S., Richter, F., Gomez, D.A., Baltissen,  
4 M.P., Meszaros, G., Magliarelli, H.D., Taudt, A., *et al.* (2017). Histone propionylation is a mark  
5 of active chromatin. *Nat Struct Mol Biol* *24*, 1048-+.
- 6 Kleppe, A., Albrechtsen, F., Vlatkovic, L., Pradhan, M., Nielsen, B., Hveem, T.S., Askautrud,  
7 H.A., Kristensen, G.B., Nesbakken, A., Trovik, J., *et al.* (2018). Chromatin organisation and  
8 cancer prognosis: a pan-cancer study. *Lancet Oncology* *19*, 356-369.
- 9 Knight, P.A., and Ruiz, D. (2013). A fast algorithm for matrix balancing. *Ima J Numer Anal* *33*,  
10 1029-1047.
- 11 Kustatscher, G., Grabowski, P., Schrader, T.A., Passmore, J.B., Schrader, M., and Rappsilber, J.  
12 (2019). Co-regulation map of the human proteome enables identification of protein functions.  
13 *Nat Biotechnol* *37*, 1361-+.
- 14 Larson, A.G., Elnatan, D., Keenen, M.M., Trnka, M.J., Johnston, J.B., Burlingame, A.L., Agard,  
15 D.A., Redding, S., and Narlikar, G.J. (2017). Liquid droplet formation by HP1alpha suggests a  
16 role for phase separation in heterochromatin. *Nature* *547*, 236-240.
- 17 Le, A., Udupa, S., and Zhang, C. (2019). The Metabolic Interplay between Cancer and Other  
18 Diseases. *Trends Cancer* *5*, 809-821.
- 19 Lee, C.F., Chavez, J.D., Garcia-Menendez, L., Choi, Y., Roe, N.D., Chiao, Y.A., Edgar, J.S.,  
20 Goo, Y.A., Goodlett, D.R., Bruce, J.E., *et al.* (2016). Normalization of NAD(+) Redox Balance  
21 as a Therapy for Heart Failure. *Circulation* *134*, 883-+.
- 22 Lee, H.C., and Zhao, Y.J. (2019). Resolving the topological enigma in Ca<sup>2+</sup> signaling by cyclic  
23 ADP-ribose and NAADP. *Journal of Biological Chemistry* *294*, 19831-19843.
- 24 Letouze, E., Martinelli, C., Lorient, C., Burnichon, N., Abermil, N., Ottolenghi, C., Janin, M.,  
25 Menara, M., Nguyen, A.T., Benit, P., *et al.* (2013). SDH mutations establish a hypermethylator  
26 phenotype in paraganglioma. *Cancer Cell* *23*, 739-752.
- 27 Li, L., Shi, L., Yang, S.D., Yan, R.R., Zhang, D., Yang, J.G., He, L., Li, W.J., Yi, X., Sun, L.Y.,  
28 *et al.* (2016). SIRT7 is a histone desuccinylase that functionally links to chromatin compaction  
29 and genome stability. *Nature Communications* *7*.
- 30 Li, M., Valsakumar, V., Poorey, K., Bekiranov, S., and Smith, J.S. (2013). Genome-wide  
31 analysis of functional sirtuin chromatin targets in yeast. *Genome Biol* *14*, R48.
- 32 Li, Y.N., Evers, J., Luo, A., Erber, L., Postler, Z., and Chen, Y. (2019). A Quantitative Chemical  
33 Proteomics Approach for Site-specific Stoichiometry Analysis of Ubiquitination. *Angew Chem*  
34 *Int Edit* *58*, 537-541.
- 35 Lieberman-Aiden, E., van Berkum, N.L., Williams, L., Imakaev, M., Ragoczy, T., Telling, A.,  
36 Amit, I., Lajoie, B.R., Sabo, P.J., Dorschner, M.O., *et al.* (2009). Comprehensive Mapping of  
37 Long-Range Interactions Reveals Folding Principles of the Human Genome. *Science* *326*, 289-  
38 293.
- 39 Linhoff, M.W., Garg, S.K., and Mandel, G. (2015). A high-resolution imaging approach to  
40 investigate chromatin architecture in complex tissues. *Cell* *163*, 246-255.
- 41 Liu, X., Sadhukhan, S., Sun, S., Wagner, G.R., Hirschev, M.D., Qi, L., Lin, H., and Locasale,  
42 J.W. (2015). High-Resolution Metabolomics with Acyl-CoA Profiling Reveals Widespread  
43 Remodeling in Response to Diet. *Mol Cell Proteomics* *14*, 1489-1500.
- 44 Liu, X., Ser, Z., and Locasale, J.W. (2014). Development and quantitative evaluation of a high-  
45 resolution metabolomics technology. *Anal Chem* *86*, 2175-2184.

- 1 Lowary, P.T., and Widom, J. (1998). New DNA sequence rules for high affinity binding to  
2 histone octamer and sequence-directed nucleosome positioning. *Journal of molecular biology*  
3 276, 19-42.
- 4 Lu, L., Liu, X., Peng, J., Li, Y., and Jin, F. (2018). Easy Hi-C: A simple efficient protocol for 3D  
5 genome mapping in small cell populations. *bioRxiv*.
- 6 Madsen, A.S., Andersen, C., Daoud, M., Anderson, K.A., Laursen, J.S., Chakladar, S., Huynh,  
7 F.K., Colaco, A.R., Backos, D.S., Fristrup, P., *et al.* (2016). Investigating the Sensitivity of  
8 NAD(+)-dependent Sirtuin Deacetylation Activities to NADH. *Journal of Biological Chemistry*  
9 291, 7128-7141.
- 10 McCauley, M.J., Huo, R., Becker, N., Holte, M.N., Muthurajan, U.M., Rouzina, I., Luger, K.,  
11 Maher, L.J., 3rd, Israeloff, N.E., and Williams, M.C. (2019). Single and double box HMGB  
12 proteins differentially destabilize nucleosomes. *Nucleic Acids Res* 47, 666-678.
- 13 McCauley, M.J., Rueter, E.M., Rouzina, I., Maher, L.J., 3rd, and Williams, M.C. (2013). Single-  
14 molecule kinetics reveal microscopic mechanism by which High-Mobility Group B proteins alter  
15 DNA flexibility. *Nucleic Acids Res* 41, 167-181.
- 16 McCauley, M.J., and Williams, M.C. (2009). Review: Optical tweezers experiments resolve  
17 distinct modes of DNA-protein binding. *Biopolymers* 91, 265-282.
- 18 McQuin, C., Goodman, A., Chernyshev, V., Kametsky, L., Cimini, B.A., Karhohs, K.W., Doan,  
19 M., Ding, L.Y., Rafelski, S.M., Thirstrup, D., *et al.* (2018). CellProfiler 3.0: Next-generation  
20 image processing for biology. *Plos Biol* 16.
- 21 Miranda-Goncalves, V., Lameirinhas, A., Henrique, R., and Jeronimo, C. (2018). Metabolism  
22 and Epigenetic Interplay in Cancer: Regulation and Putative Therapeutic Targets. *Front Genet* 9.
- 23 Murugesapillai, D., McCauley, M.J., Huo, R., Nelson Holte, M.H., Stepanyants, A., Maher, L.J.,  
24 3rd, Israeloff, N.E., and Williams, M.C. (2014). DNA bridging and looping by HMO1 provides a  
25 mechanism for stabilizing nucleosome-free chromatin. *Nucleic Acids Res* 42, 8996-9004.
- 26 Muthurajan, U.M., McBryant, S.J., Lu, X., Hansen, J.C., and Luger, K. (2011). The linker region  
27 of macroH2A promotes self-association of nucleosomal arrays. *J Biol Chem* 286, 23852-23864.
- 28 Nagano, T., Lubling, Y., Vaarnai, C., Dudley, C., Leung, W., Baran, Y., Cohen, N.M., Wingett,  
29 S., Fraser, P., and Tanay, A. (2017). Cell-cycle dynamics of chromosomal organization at single-  
30 cell resolution. *Nature* 547, 61-+.
- 31 Nuebler, J., Fudenberg, G., Imakaev, M., Abdennur, N., and Mirny, L.A. (2018). Chromatin  
32 organization by an interplay of loop extrusion and compartmental segregation. *Proc Natl Acad*  
33 *Sci U S A* 115, E6697-E6706.
- 34 Ogden, T.L. (2010). Handling results below the level of detection. *Ann Occup Hyg* 54, 255-256.
- 35 Otterstrom, J., Castells-Garcia, A., Vicario, C., Gomez-Garcia, P.A., Cosma, M.P., and  
36 Lakadamyali, M. (2019). Super-resolution microscopy reveals how histone tail acetylation  
37 affects DNA compaction within nucleosomes in vivo. *Nucleic Acids Res* 47, 8470-8484.
- 38 Ou, J., Liu, H., Yu, J., Kelliher, M.A., Castilla, L.H., Lawson, N.D., and Zhu, L.J. (2018).  
39 ATACseqQC: a Bioconductor package for post-alignment quality assessment of ATAC-seq data.  
40 *BMC Genomics* 19, 169.
- 41 Press, W.H., Teukolsky, S.A., Vetterling, W.T., and Flannery, B.P. (2002). *Numerical Recipes*  
42 *in C: The Art of Scientific Computing* (Cambridge: Cambridge University Press).
- 43 Reid, M.A., Dai, Z.W., and Locasale, J.W. (2017). The impact of cellular metabolism on  
44 chromatin dynamics and epigenetics. *Nat Cell Biol* 19, 1298-1306.



- 1 Rogge, R.A., Kalashnikova, A.A., Muthurajan, U.M., Porter-Goff, M.E., Luger, K., and Hansen,  
2 J.C. (2013). Assembly of nucleosomal arrays from recombinant core histones and nucleosome  
3 positioning DNA. *Journal of visualized experiments : JoVE*.
- 4 Rosa-Garrido, M., Chapski, D.J., Schmitt, A.D., Kimball, T.H., Karbassi, E., Monte, E.,  
5 Balderas, E., Pellegrini, M., Shih, T.T., Soehalim, E., *et al.* (2017). High-Resolution Mapping of  
6 Chromatin Conformation in Cardiac Myocytes Reveals Structural Remodeling of the Epigenome  
7 in Heart Failure. *Circulation* *136*, 1613-+.
- 8 Rosario, S.R., Long, M.D., Affronti, H.C., Rowsam, A.M., Eng, K.H., and Smiraglia, D.J.  
9 (2018). Pan-cancer analysis of transcriptional metabolic dysregulation using The Cancer  
10 Genome Atlas. *Nature Communications* *9*.
- 11 Schep, A.N., Buenrostro, J.D., Denny, S.K., Schwartz, K., Sherlock, G., and Greenleaf, W.J.  
12 (2015). Structured nucleosome fingerprints enable high-resolution mapping of chromatin  
13 architecture within regulatory regions. *Genome Res* *25*, 1757-1770.
- 14 Seol, Y., Li, J., Nelson, P.C., Perkins, T.T., and Betterton, M.D. (2007). Elasticity of Short DNA  
15 Molecules: Theory and Experiment for Contour Lengths of 0.6–7  $\mu\text{m}$ . *Biophysical Journal* *93*,  
16 4360-4373.
- 17 Simeoni, F., Tasselli, L., Tanaka, S., Villanova, L., Hayashi, M., Kubota, K., Isono, F., Garcia,  
18 B.A., Michishita-Kioi, E., and Chua, K.F. (2013). Proteomic analysis of the SIRT6 interactome:  
19 novel links to genome maintenance and cellular stress signaling. *Sci Rep* *3*, 3085.
- 20 Simithy, J., Sidoli, S., Yuan, Z.F., Coradin, M., Bhanu, N.V., Marchione, D.M., Klein, B.J.,  
21 Bazilevsky, G.A., McCullough, C.E., Magin, R.S., *et al.* (2017). Characterization of histone  
22 acylations links chromatin modifications with metabolism. *Nat Commun* *8*, 1141.
- 23 Simpson, R.T., Whitlock, J.P., Jr., Bina-Stein, M., and Stein, A. (1978). Histone-DNA  
24 interactions in chromatin core particles. *Cold Spring Harb Symp Quant Biol* *42 Pt 1*, 127-136.
- 25 Skene, P.J., Henikoff, J.G., and Henikoff, S. (2018). Targeted in situ genome-wide profiling with  
26 high efficiency for low cell numbers. *Nat Protoc* *13*, 1006-1019.
- 27 Smestad, J., Erber, L., Chen, Y., and Maher, L.J., 3rd (2018a). Chromatin Succinylation  
28 Correlates with Active Gene Expression and Is Perturbed by Defective TCA Cycle Metabolism.  
29 *iScience* *2*, 63-75.
- 30 Smestad, J., Hamidi, O., Wang, L., Holte, M.N., Khazal, F.A., Erber, L., Chen, Y., and Maher,  
31 L.J., 3rd (2018b). Characterization and metabolic synthetic lethal testing in a new model of  
32 SDH-loss familial pheochromocytoma and paraganglioma. *Oncotarget* *9*, 6109-6127.
- 33 Smestad, J.A., and Maher, L.J. (2019). Master regulator analysis of paragangliomas carrying  
34 SDHx, VHL, or MAML3 genetic alterations. *Bmc Cancer* *19*.
- 35 Stein, L.R., and Imai, S. (2012). The dynamic regulation of NAD metabolism in mitochondria.  
36 *Trends Endocrin Met* *23*, 420-428.
- 37 Strom, A.R., Emelyanov, A.V., Mir, M., Fyodorov, D.V., Darzacq, X., and Karpen, G.H. (2017).  
38 Phase separation drives heterochromatin domain formation. *Nature* *547*, 241-245.
- 39 Studitsky, V.M., Clark, D.J., and Felsenfeld, G. (1995). Overcoming a Nucleosomal Barrier to  
40 Transcription. *Cell* *83*, 19-27.
- 41 Toro, J.R., Nickerson, M.L., Wei, M.H., Warren, M.B., Glenn, G.M., Turner, M.L., Stewart, L.,  
42 Duray, P., Toure, O., Sharma, N., *et al.* (2003). Mutations in the Fumarate hydratase gene cause  
43 hereditary leiomyomatosis and renal cell cancer in families in North America. *Am J Hum Genet*  
44 *73*, 95-106.
- 45 Tzika, E., Dreker, T., and Imhof, A. (2018). Epigenetics and Metabolism in Health and Disease.  
46 *Front Genet* *9*.

- 1 Vaquero, A., Scher, M., Lee, D.H., Erdjument-Bromage, H., Tempst, P., and Reinberg, D.  
2 (2004). Human SirT1 interacts with histone H1 and promotes formation of facultative  
3 heterochromatin. *Mol Cell* *16*, 93-105.
- 4 Vaquero, A., Scher, M.B., Lee, D.H., Sutton, A., Cheng, H.L., Alt, F.W., Serrano, L., Sternglanz,  
5 R., and Reinberg, D. (2006). SirT2 is a histone deacetylase with preference for histone H4 Lys  
6 16 during mitosis. *Genes Dev* *20*, 1256-1261.
- 7 Vazquez, E.J., Berthiaume, J.M., Kamath, V., Achike, O., Buchanan, E., Montano, M.M.,  
8 Chandler, M.P., Miyagi, M., and Rosca, M.G. (2015). Mitochondrial complex I defect and  
9 increased fatty acid oxidation enhance protein lysine acetylation in the diabetic heart. *Cardiovasc*  
10 *Res* *107*, 453-465.
- 11 Wang, L., Gao, Y., Zheng, X., Liu, C., Dong, S., Li, R., Zhang, G., Wei, Y., Qu, H., Li, Y., *et al.*  
12 (2019a). Histone Modifications Regulate Chromatin Compartmentalization by Contributing to a  
13 Phase Separation Mechanism. *Mol Cell* *76*, 646-659 e646.
- 14 Wang, Y., Mohsen, A.W., Mihalik, S.J., Goetzman, E.S., and Vockley, J. (2010). Evidence for  
15 physical association of mitochondrial fatty acid oxidation and oxidative phosphorylation  
16 complexes. *J Biol Chem* *285*, 29834-29841.
- 17 Wang, Y., Palmfeldt, J., Gregersen, N., Makhov, A.M., Conway, J.F., Wang, M., McCalley,  
18 S.P., Basu, S., Alharbi, H., St Croix, C., *et al.* (2019b). Mitochondrial fatty acid oxidation and  
19 the electron transport chain comprise a multifunctional mitochondrial protein complex. *J Biol*  
20 *Chem* *294*, 12380-12391.
- 21 Wilkins, M.R., Gasteiger, E., Bairoch, A., Sanchez, J.C., Williams, K.L., Appel, R.D., and  
22 Hochstrasser, D.F. (1999). Protein identification and analysis tools in the ExPASy server.  
23 *Methods Mol Biol* *112*, 531-552.
- 24 Xuan, W., Yao, A., and Schultz, P.G. (2017). Genetically Encoded Fluorescent Probe for  
25 Detecting Sirtuins in Living Cells. *J Am Chem Soc* *139*, 12350-12353.
- 26 Yan, H., Parsons, D.W., Jin, G.L., McLendon, R., Rasheed, B.A., Yuan, W.S., Kos, I., Batinic-  
27 Haberle, I., Jones, S., Riggins, G.J., *et al.* (2009). IDH1 and IDH2 Mutations in Gliomas. *New*  
28 *England Journal of Medicine* *360*, 765-773.
- 29 Yang, T., Zhang, F., Yardimci, G.G., Song, F., Hardison, R.C., Noble, W.S., Yue, F., and Li, Q.  
30 (2017). HiCRep: assessing the reproducibility of Hi-C data using a stratum-adjusted correlation  
31 coefficient. *Genome Res* *27*, 1939-1949.
- 32 Zhang, R., Erler, J., and Langowski, J. (2017a). Histone Acetylation Regulates Chromatin  
33 Accessibility: Role of H4K16 in Inter-nucleosome Interaction. *Biophys J* *112*, 450-459.
- 34 Zhang, R.T., Erler, J., and Langowski, J. (2017b). Histone Acetylation Regulates  
35 Chromatin Accessibility: Role of H4K16 in Inter-nucleosome Interaction. *Biophysical Journal*  
36 *112*, 450-459.
- 37 Zufferey, M., Tavernari, D., Oricchio, E., and Ciriello, G. (2018). Comparison of computational  
38 methods for the identification of topologically associating domains. *Genome Biol* *19*, 217.

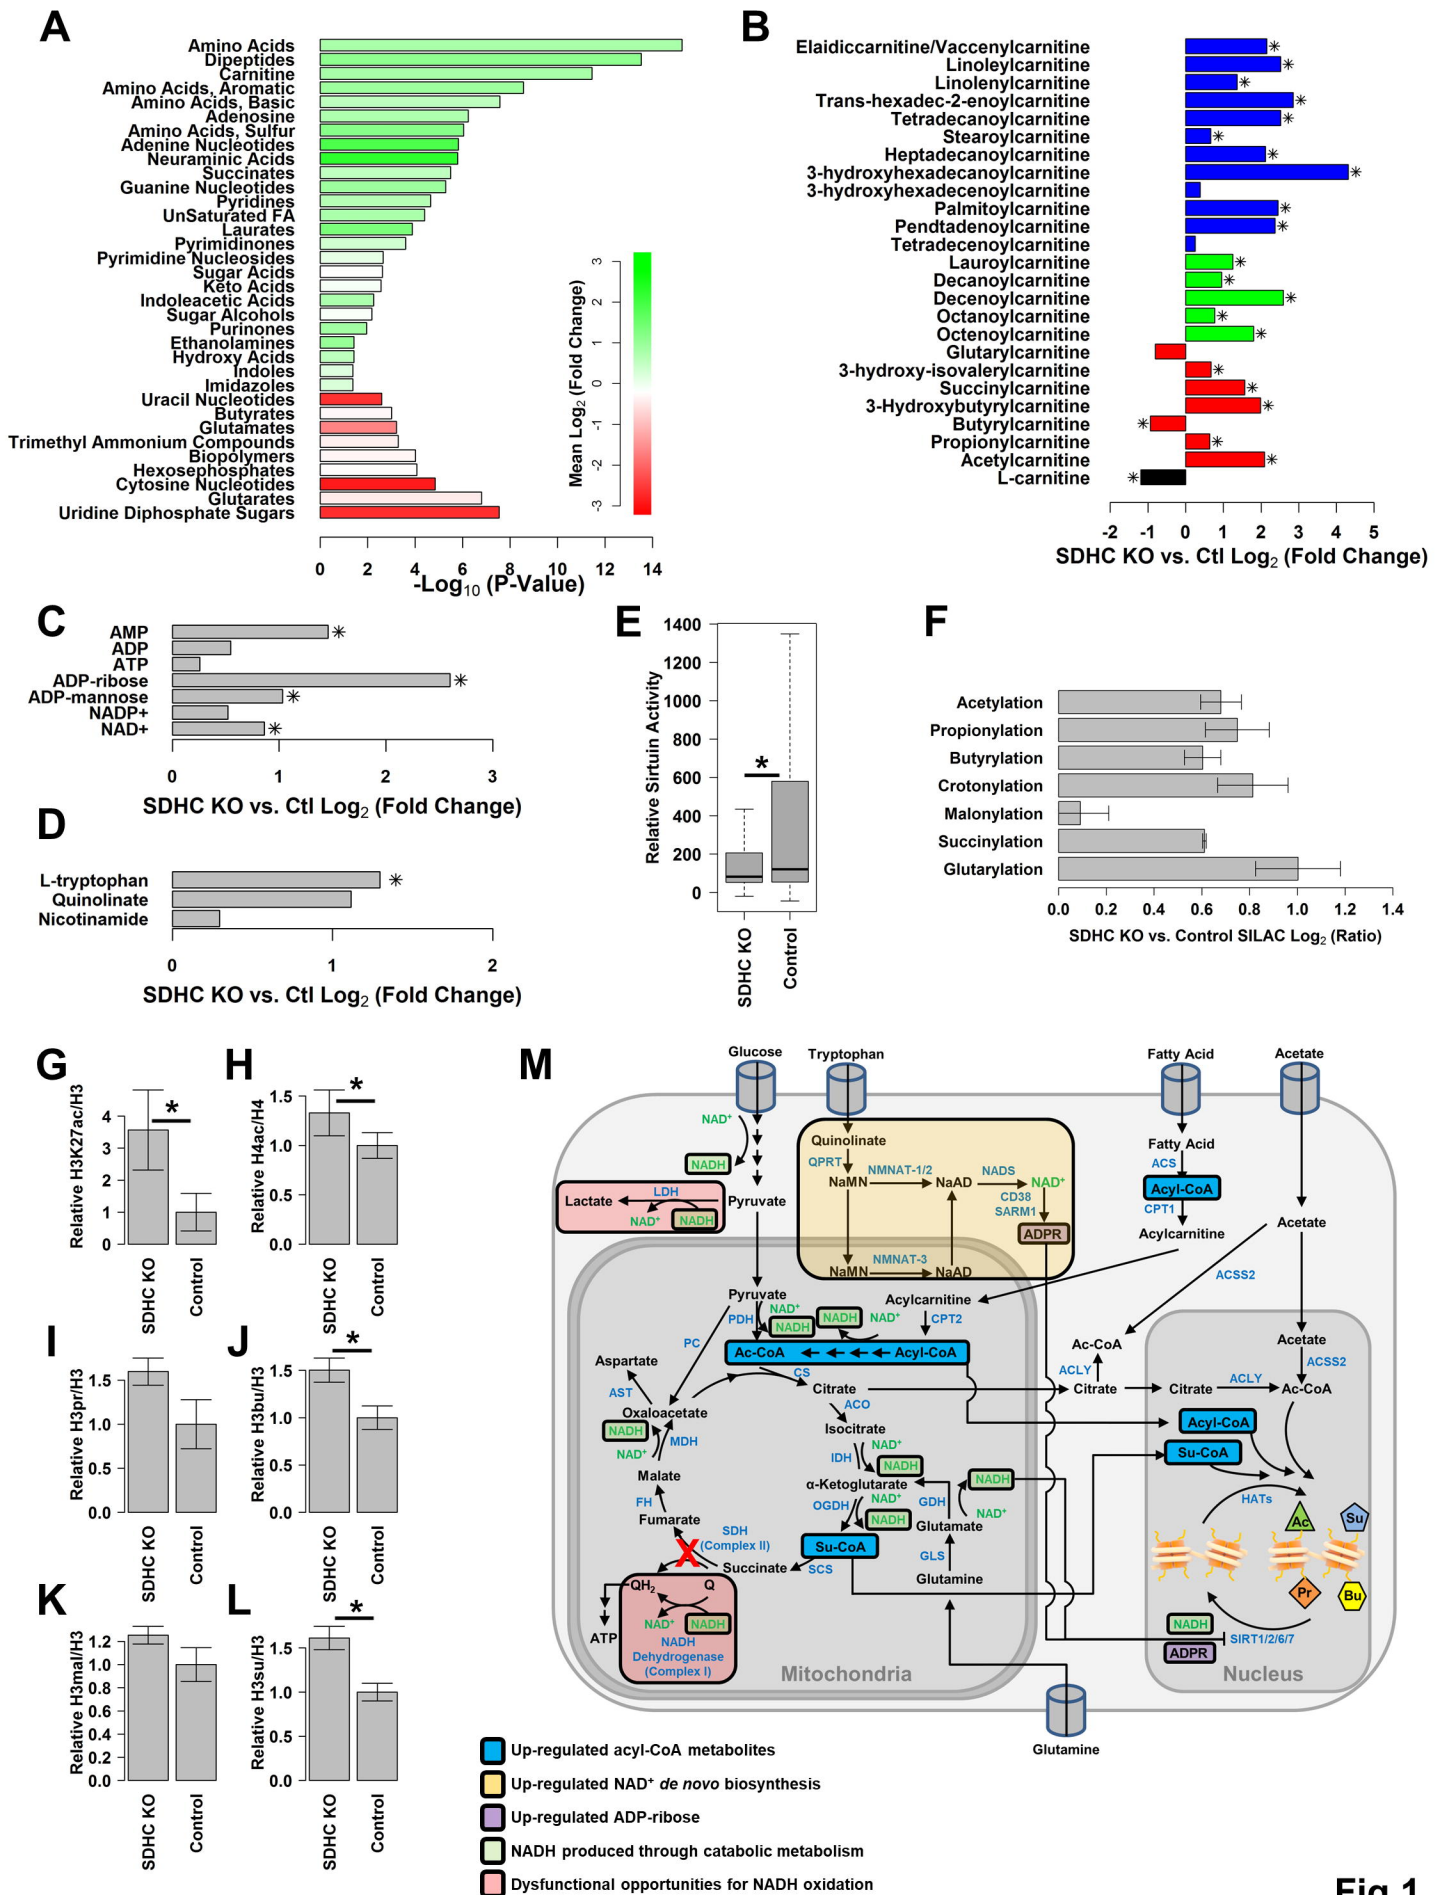

**Fig 1**

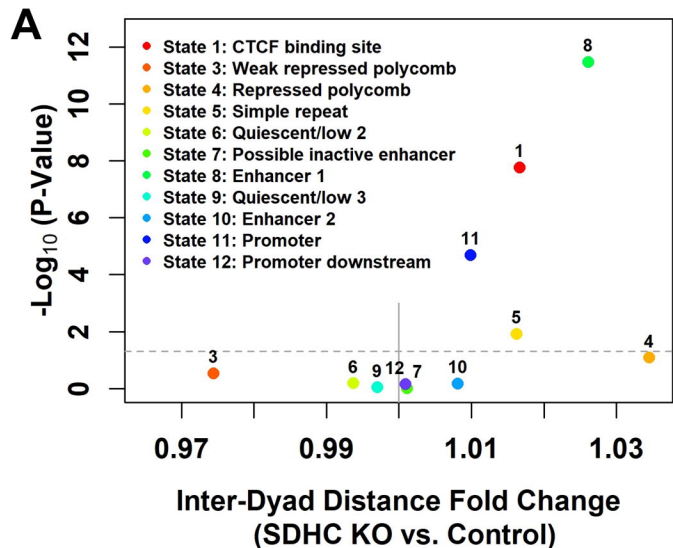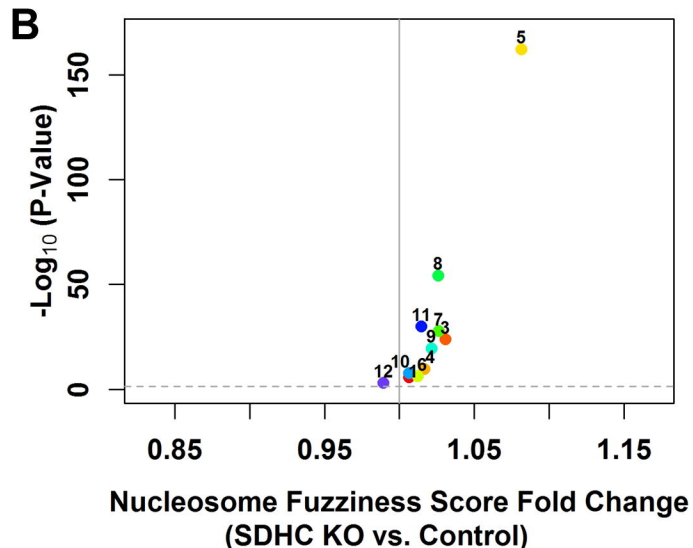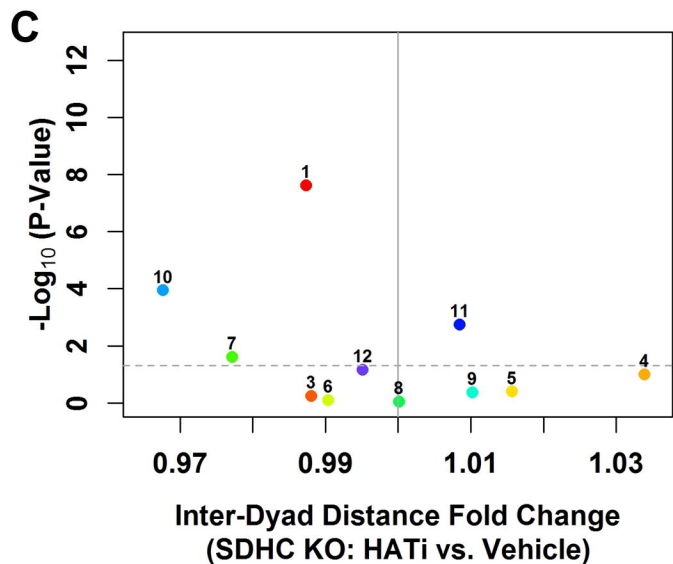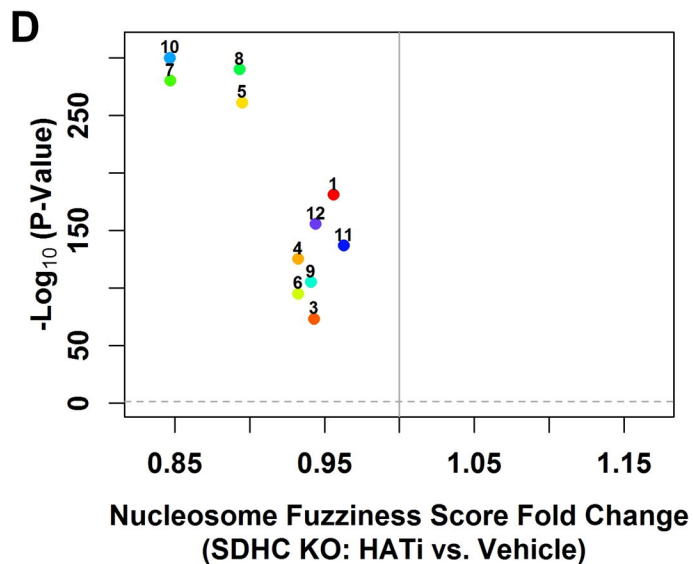

**Fig 2**



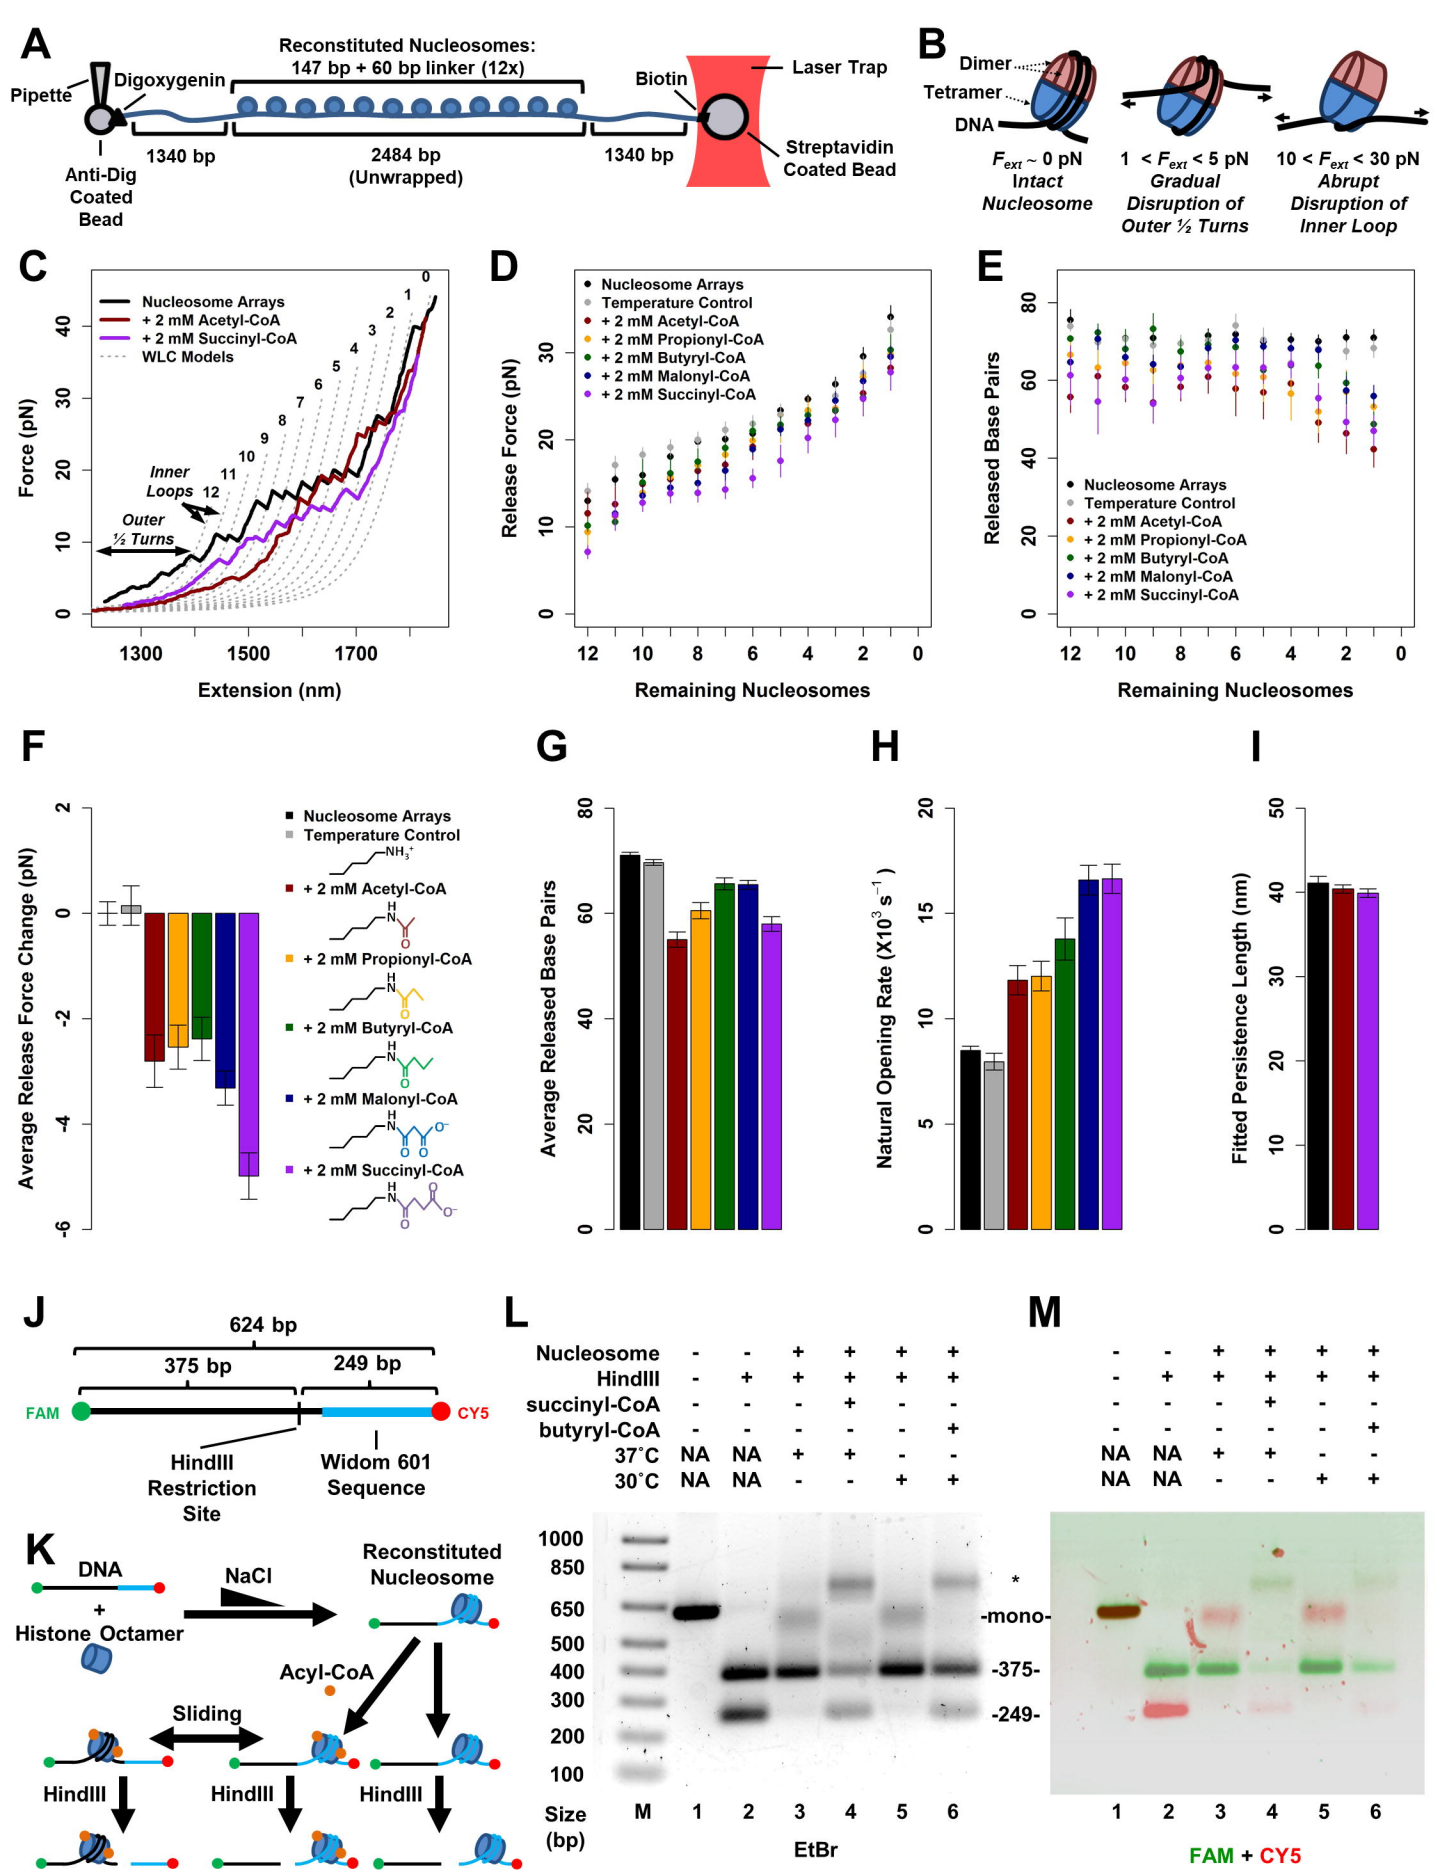

Fig 3

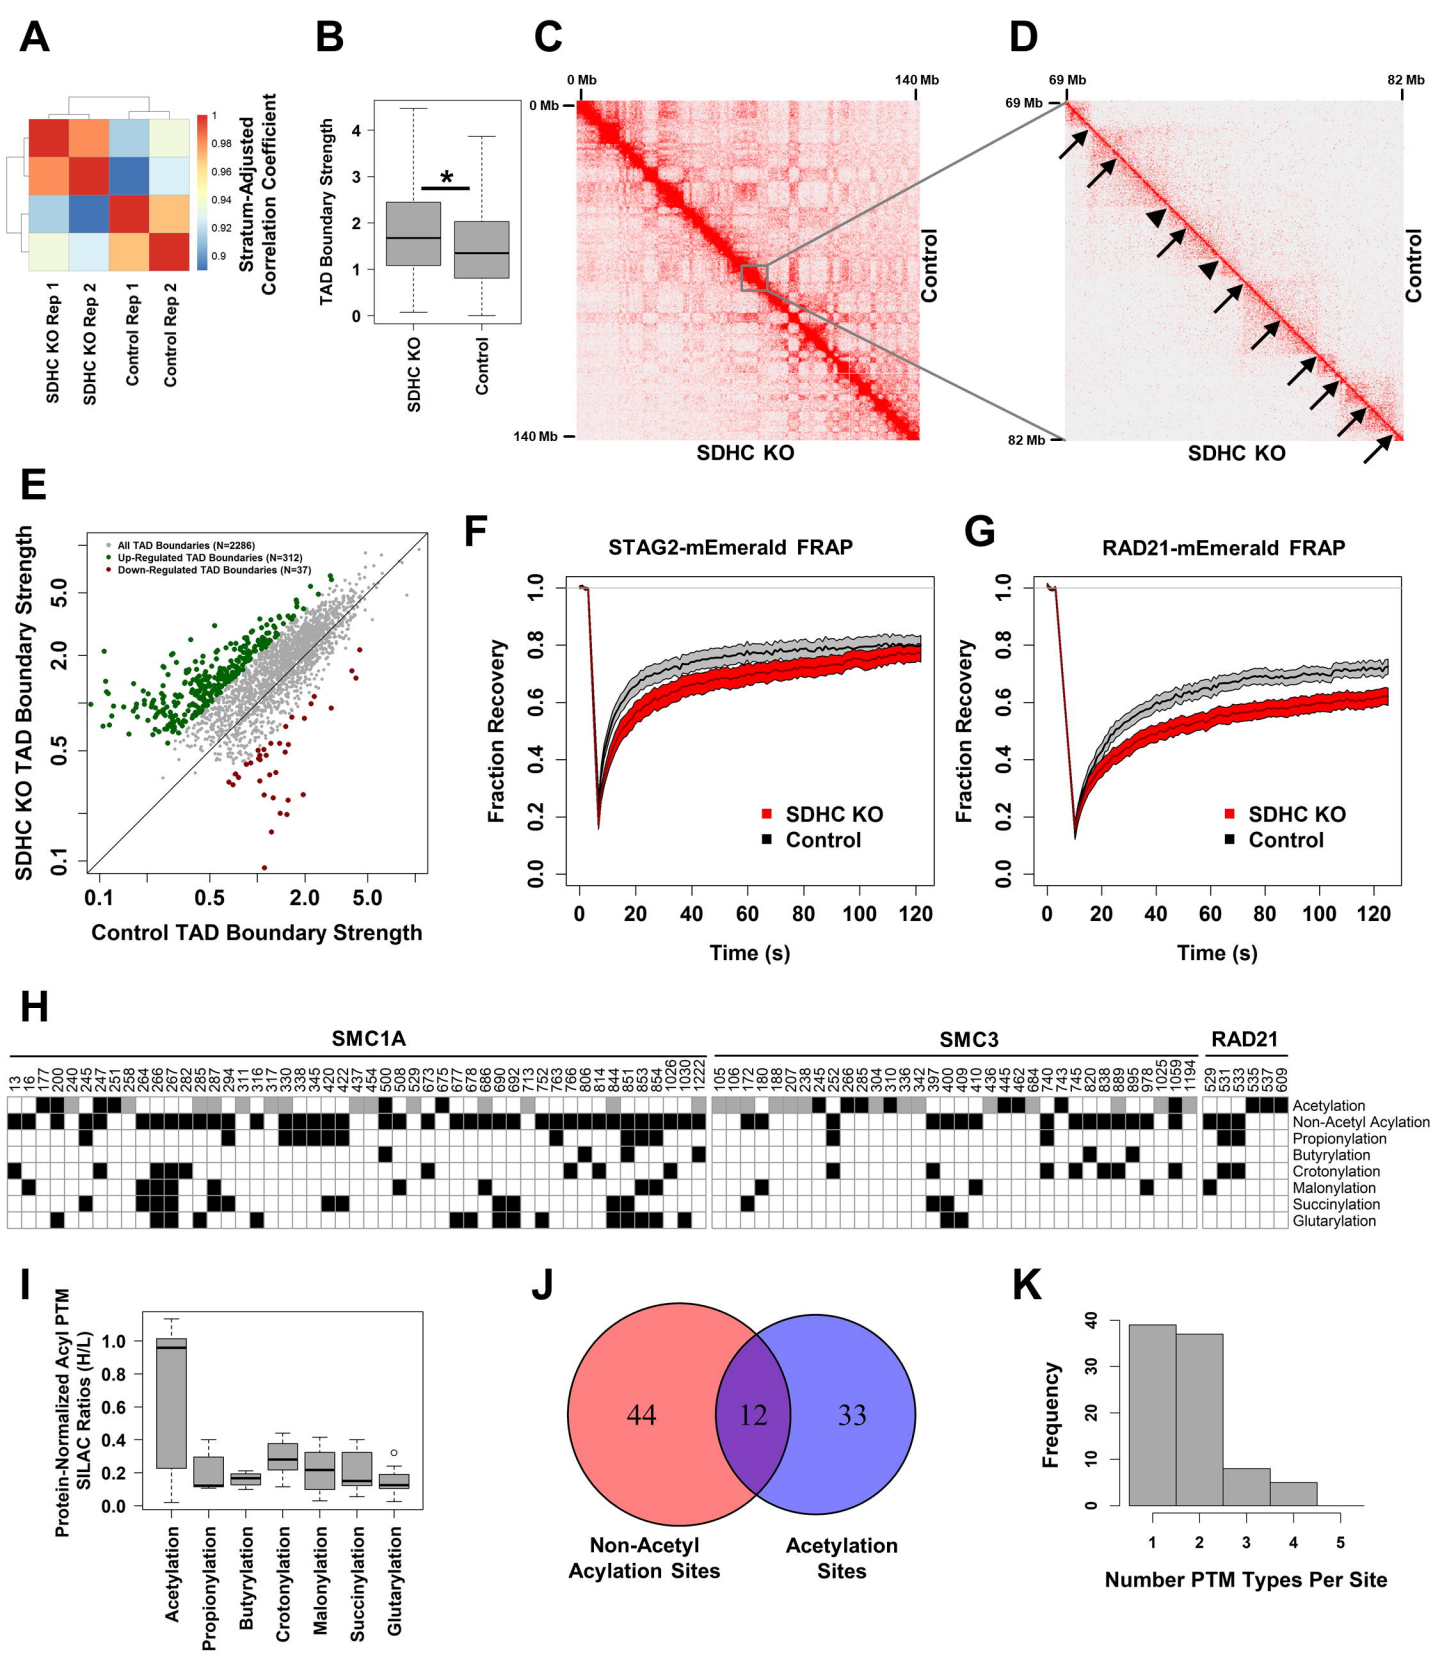

**Fig 4**

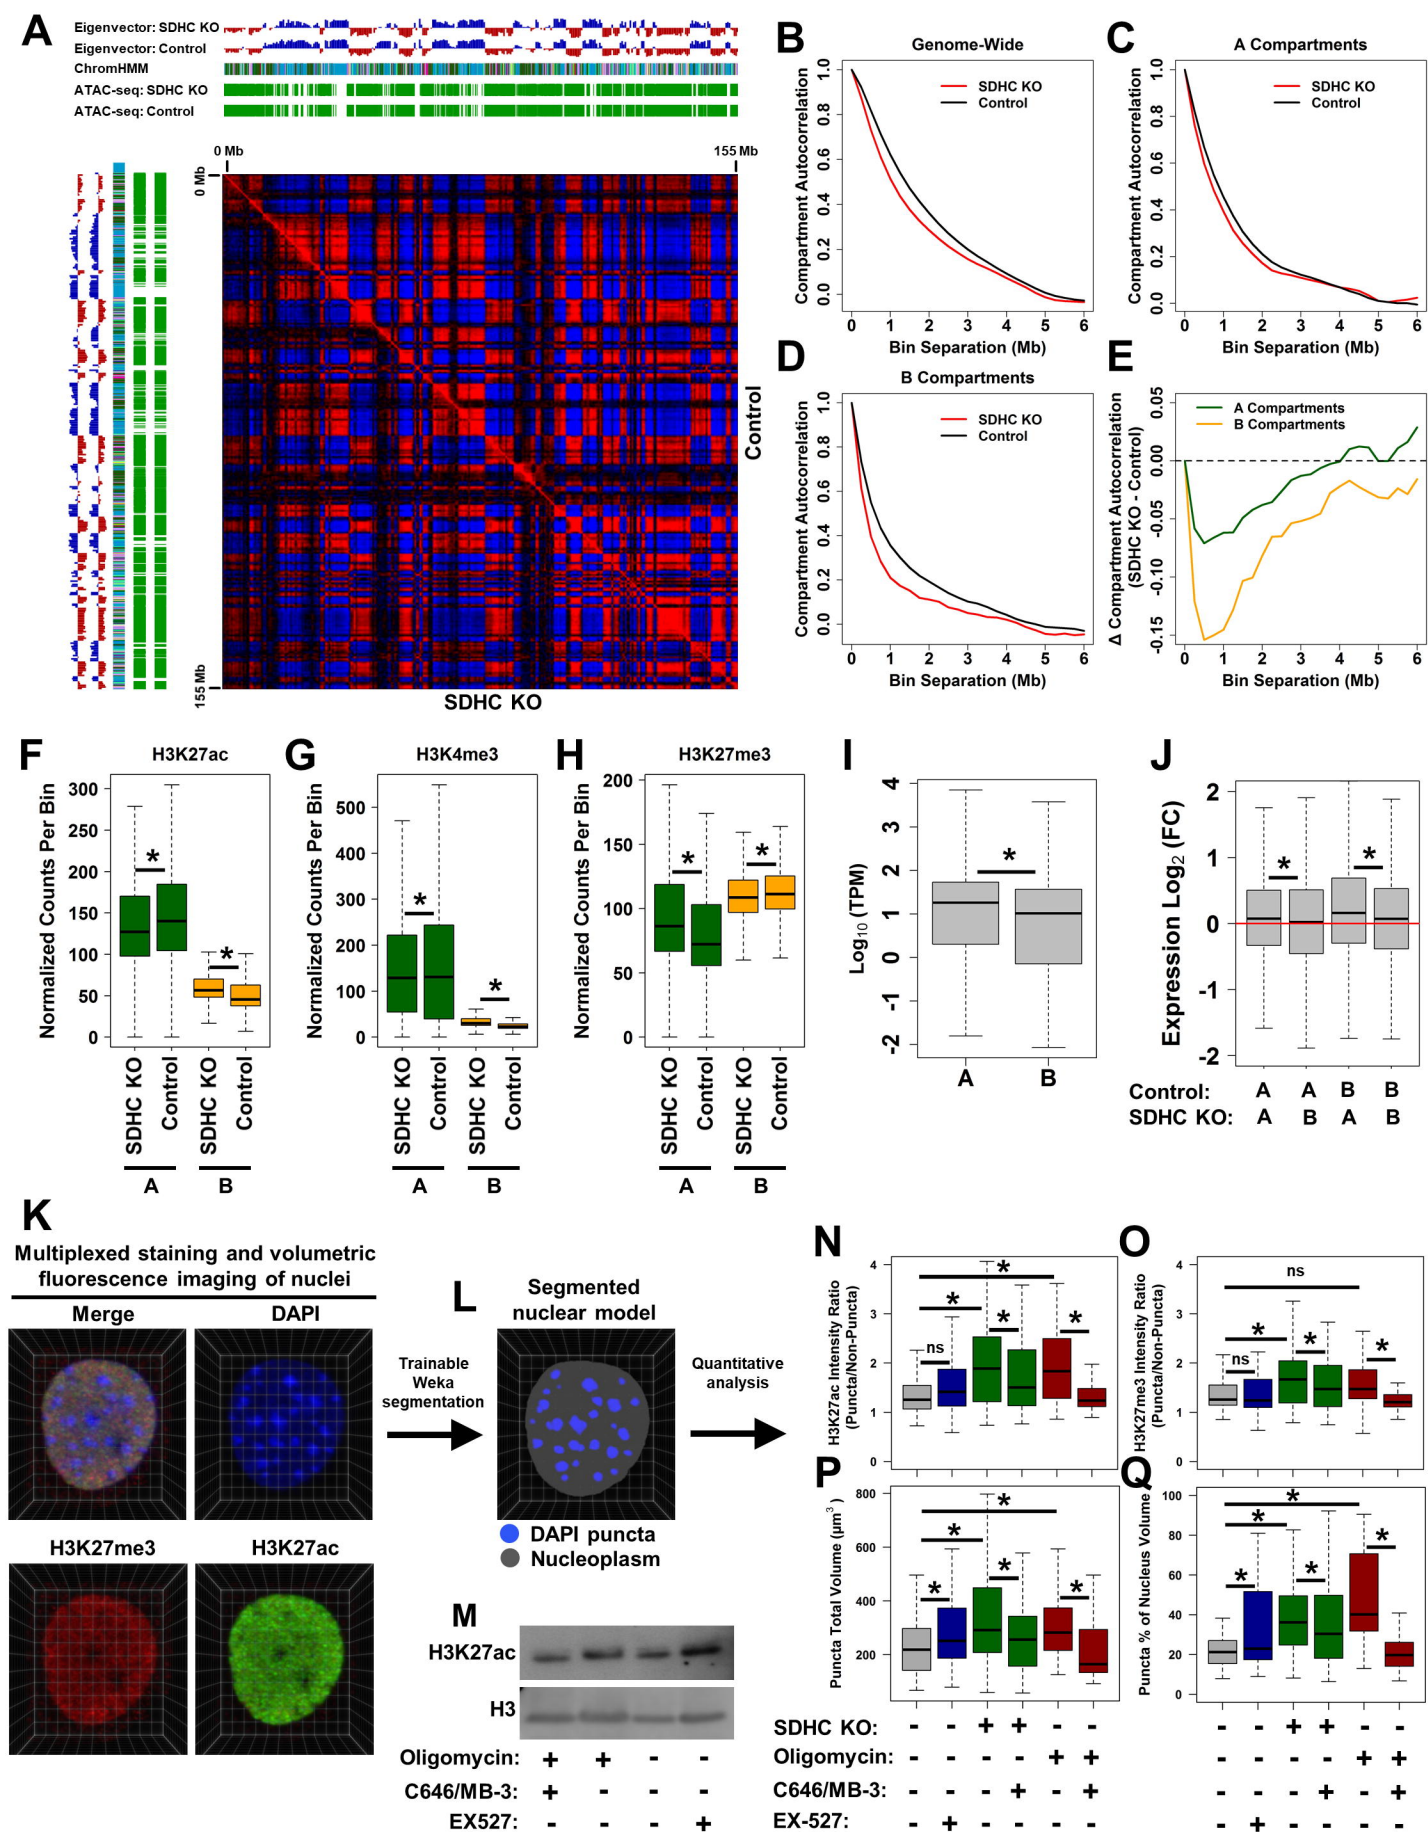

**Fig 5**



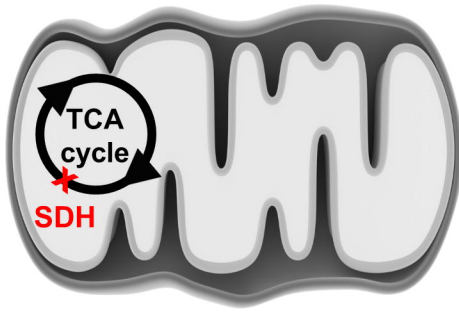

**Mitochondria**

- ↑ Acyl-CoAs
- ↓ NAD<sup>+</sup>/NADH
- ↑ ADP-ribose

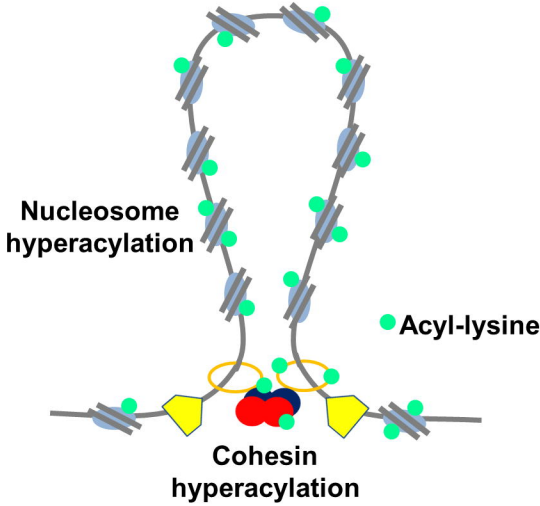

**Nucleus**

**Chromatin  
Distance Scale**

**Pathology**

**Nucleosomes  
(100 - 200 bp)**

- ↑ Inter-dyad distance
- ↓ Positioning

**TADs  
(40 Kbp – 3 Mbp)**

- ↓ Cohesin dissociation
- ↓ Chromatin loop dissolution

**Compartments  
(1 – 100 Mbp)**

- Weakened compartments
- Equilibrated epigenetic marks

**Fig 6**

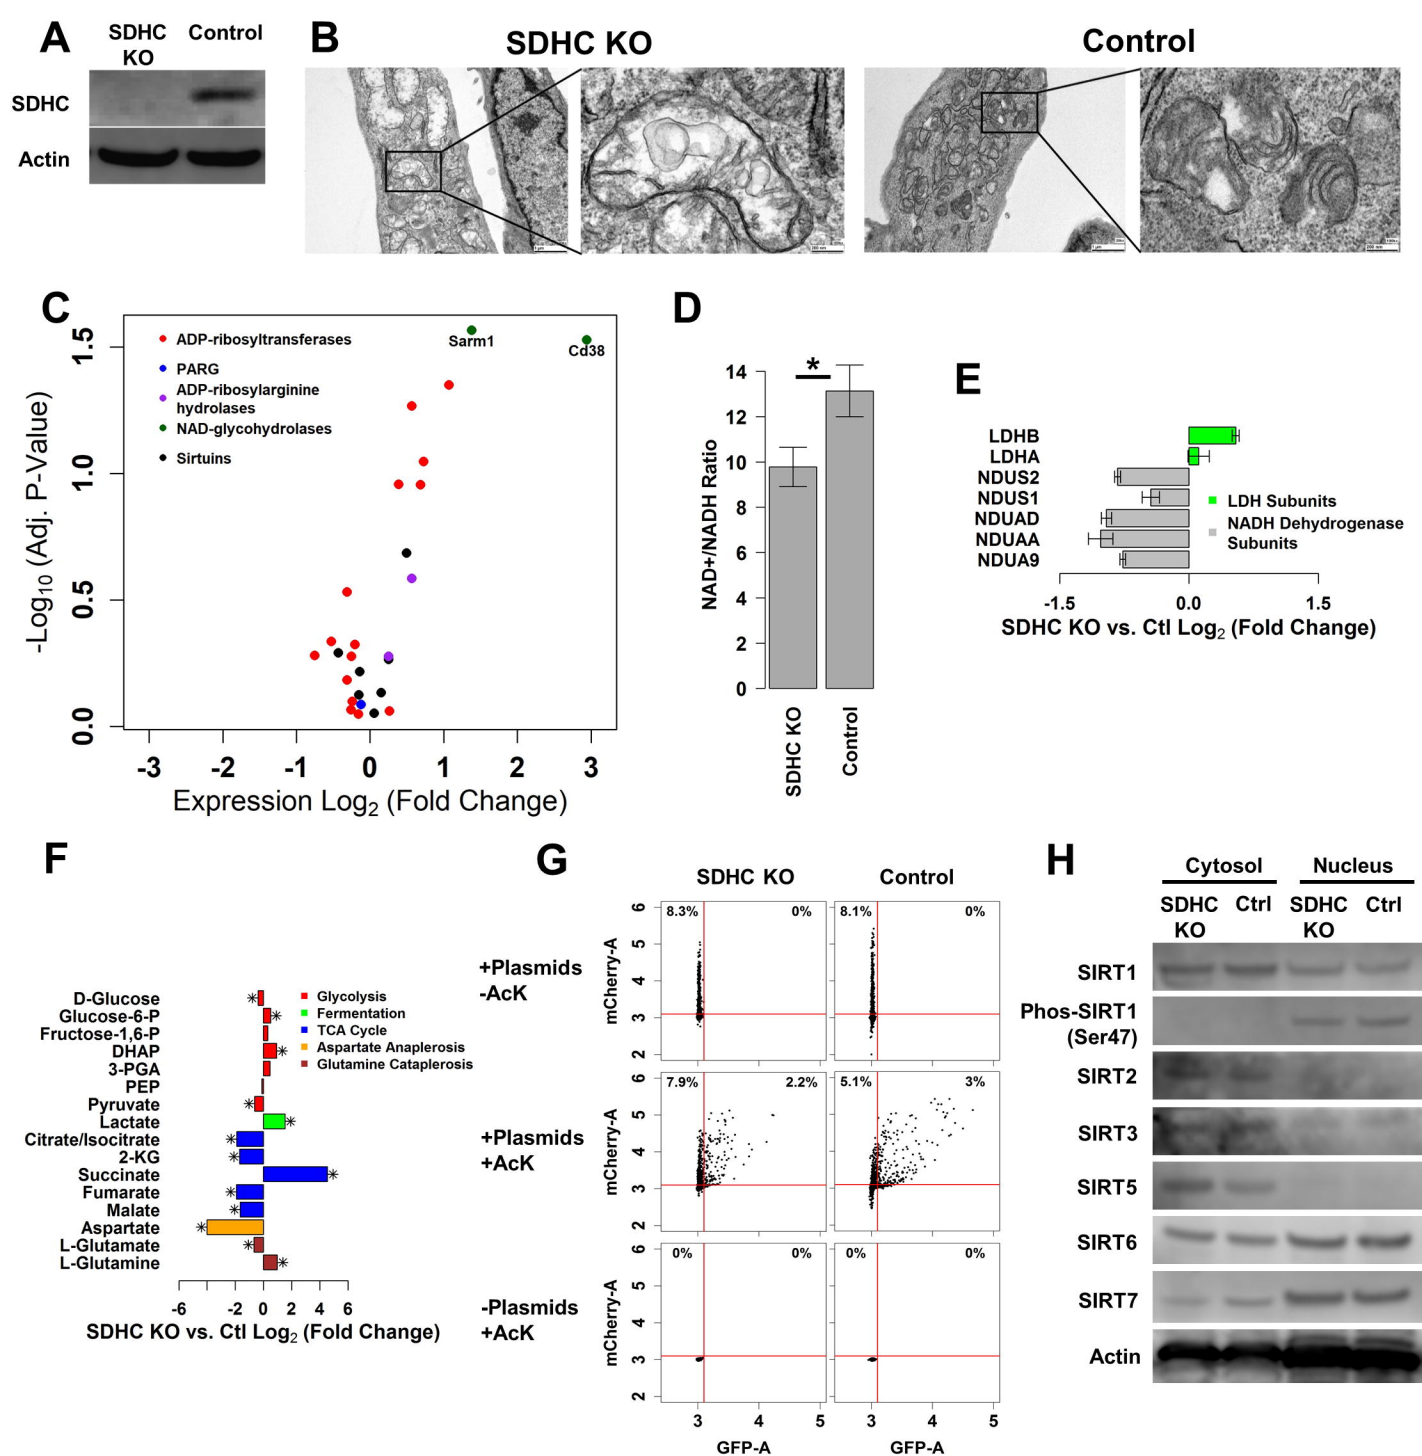

**Fig S1**

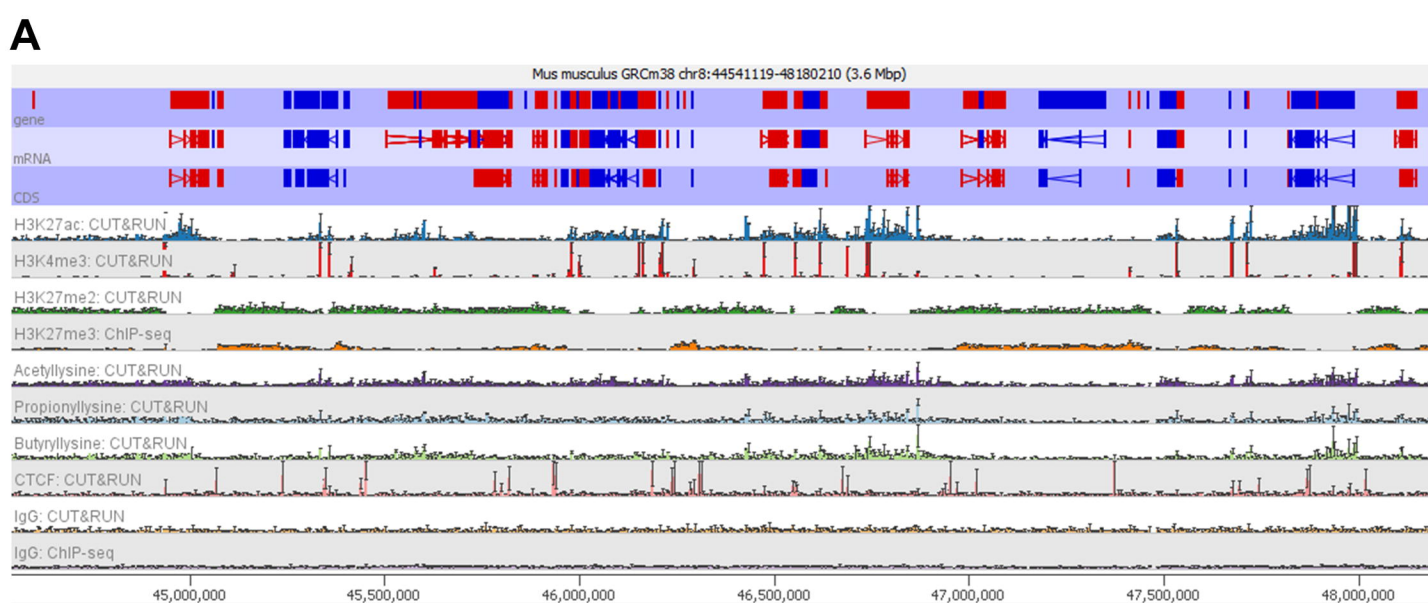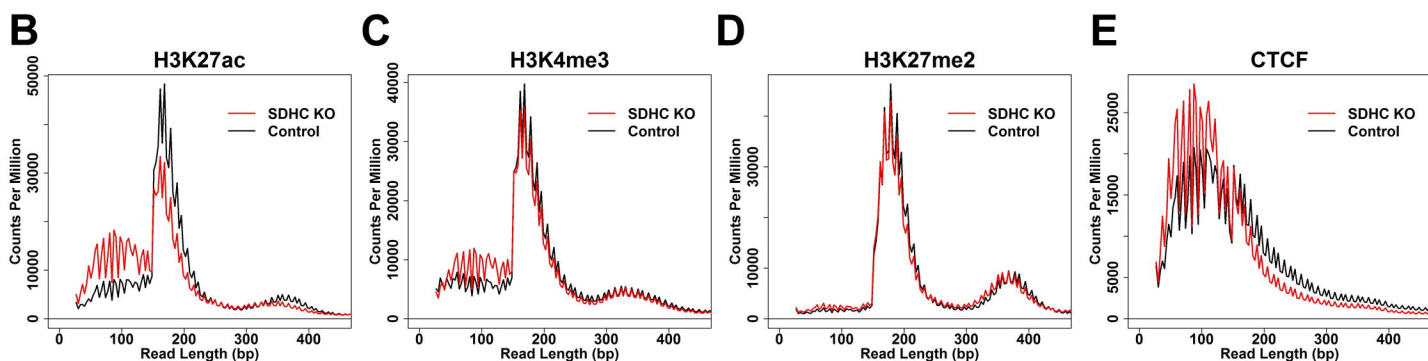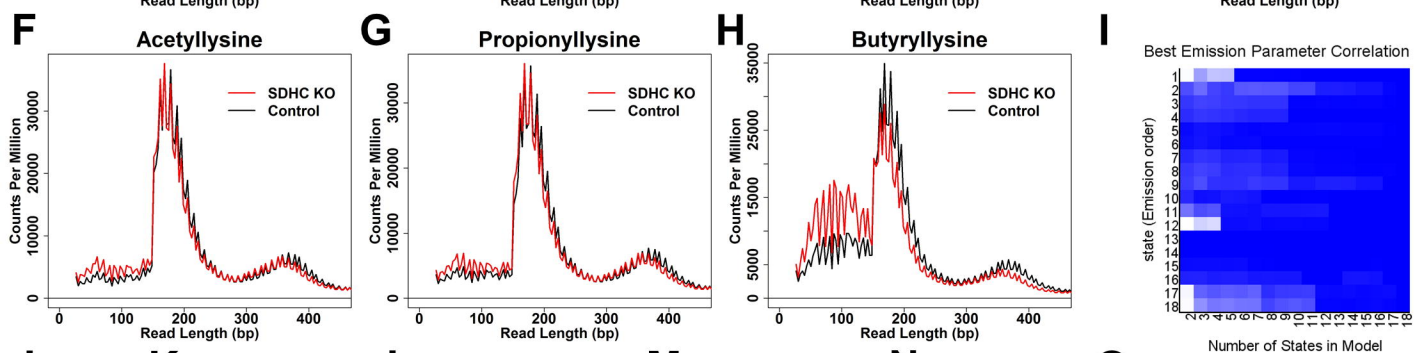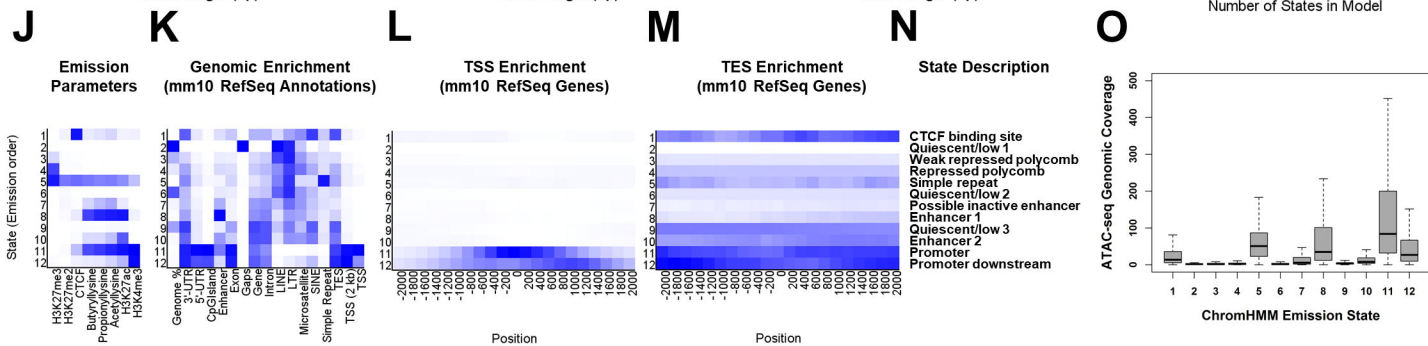

**Fig S2**

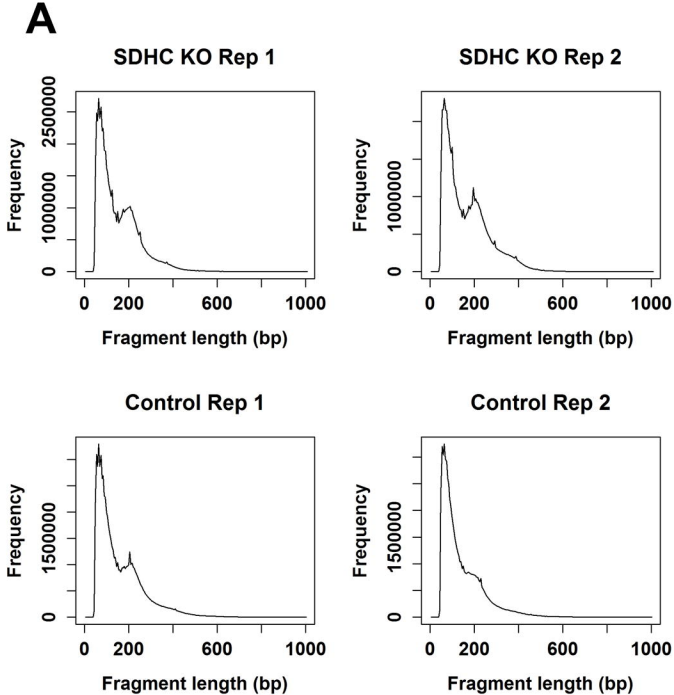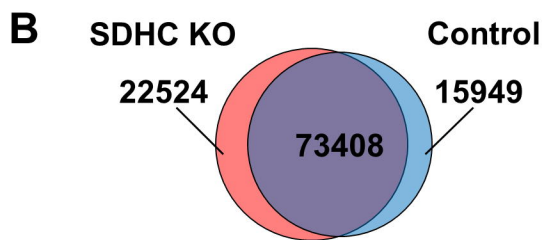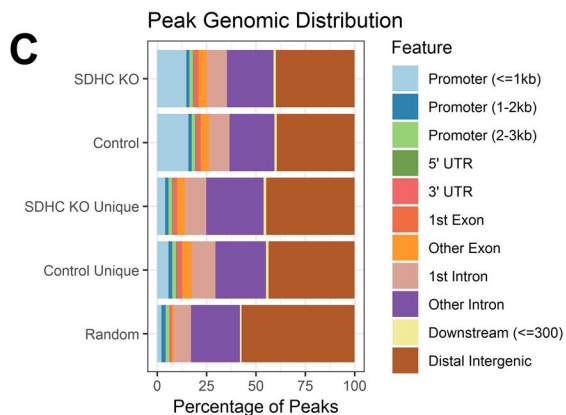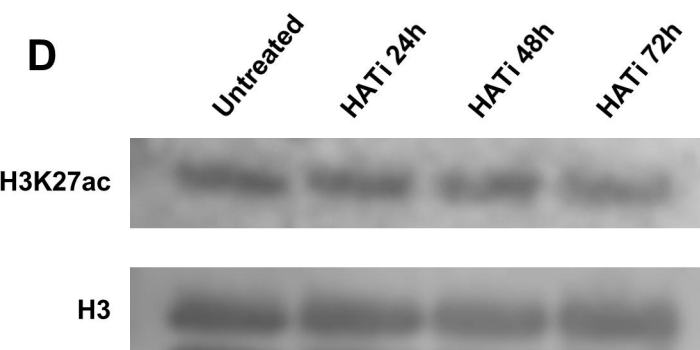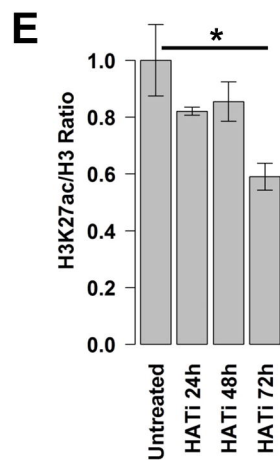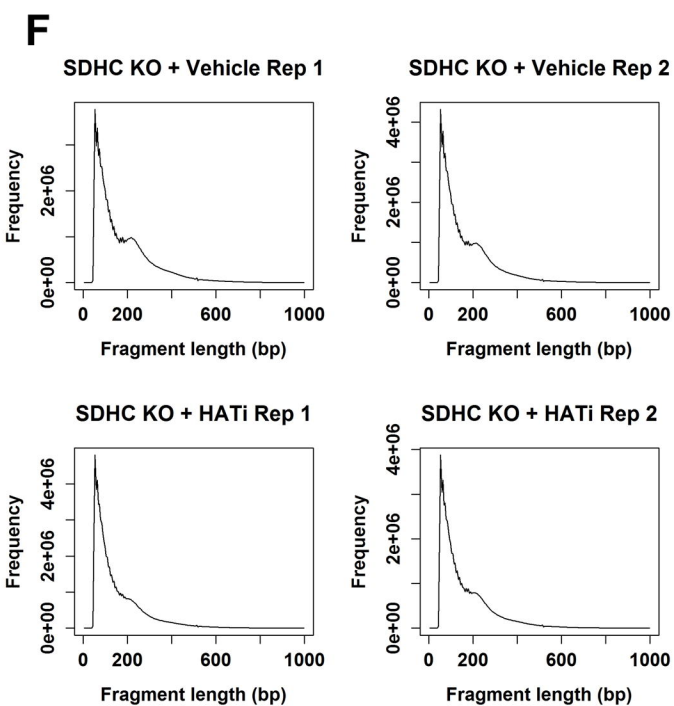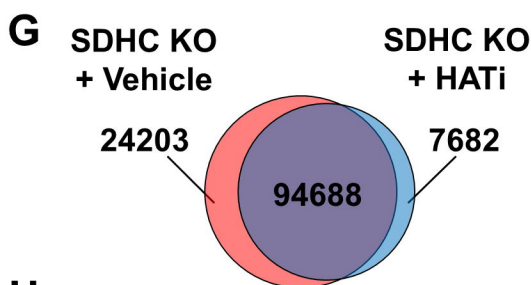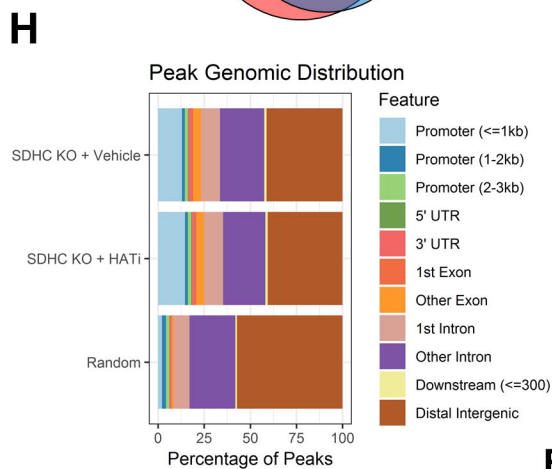

**Fig S3**



**A**

|            |    |    |    |    |    |    |    |    |
|------------|----|----|----|----|----|----|----|----|
| Nucleosome | -  | +  | +  | +  | +  | +  | +  | +  |
| Acyl-CoA   | -  | -  | su | su | pr | bu | ma | ac |
| Temp (°C)  | 37 | 37 | 30 | 37 | 30 | 30 | 37 | 37 |

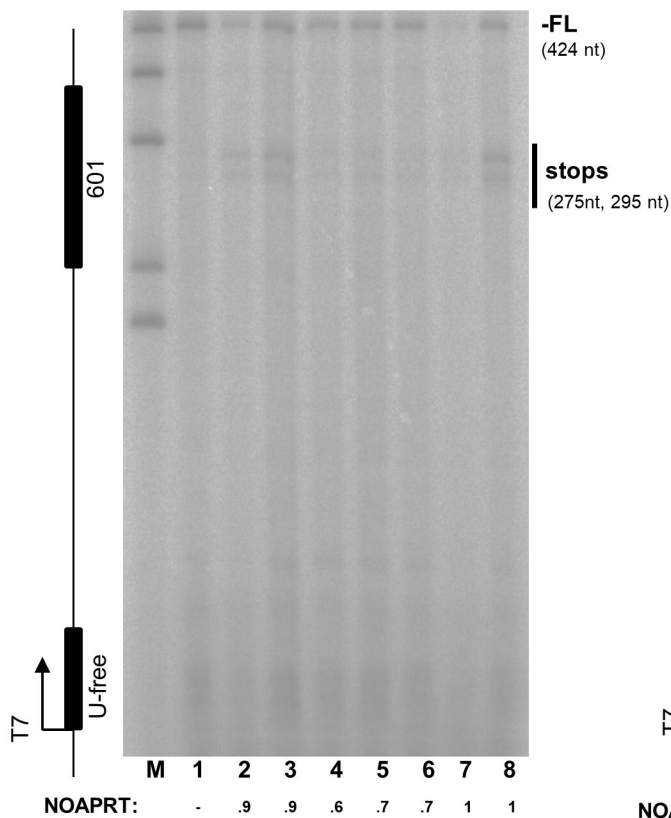**B**

|            |    |    |    |    |    |
|------------|----|----|----|----|----|
| Nucleosome | -  | +  | +  | +  | +  |
| Acyl-CoA   | -  | -  | su | pr | bu |
| Temp (°C)  | 37 | 37 | 37 | 37 | 37 |

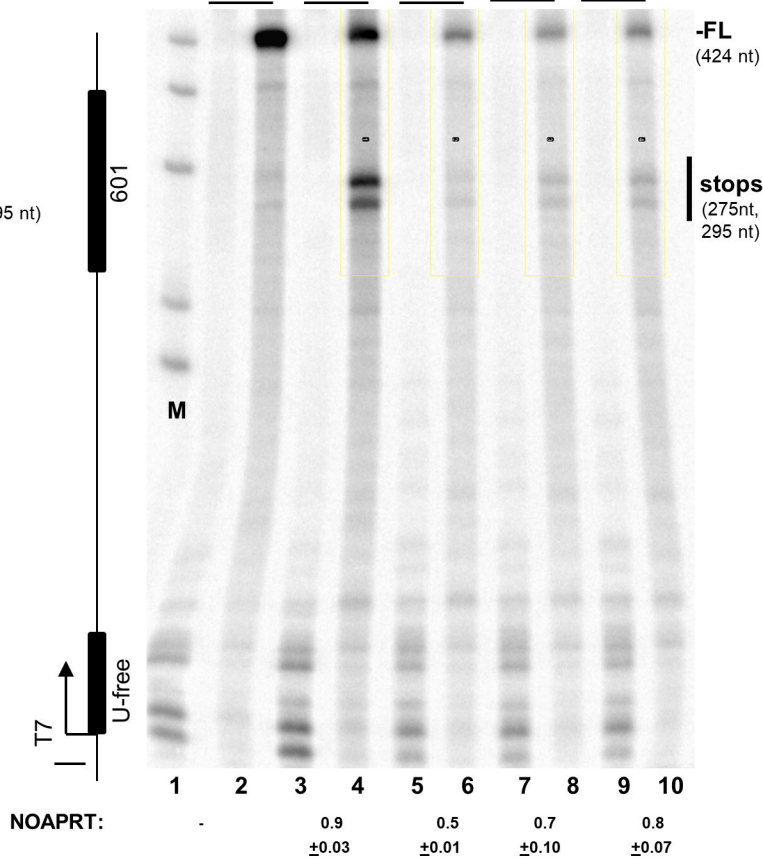**C**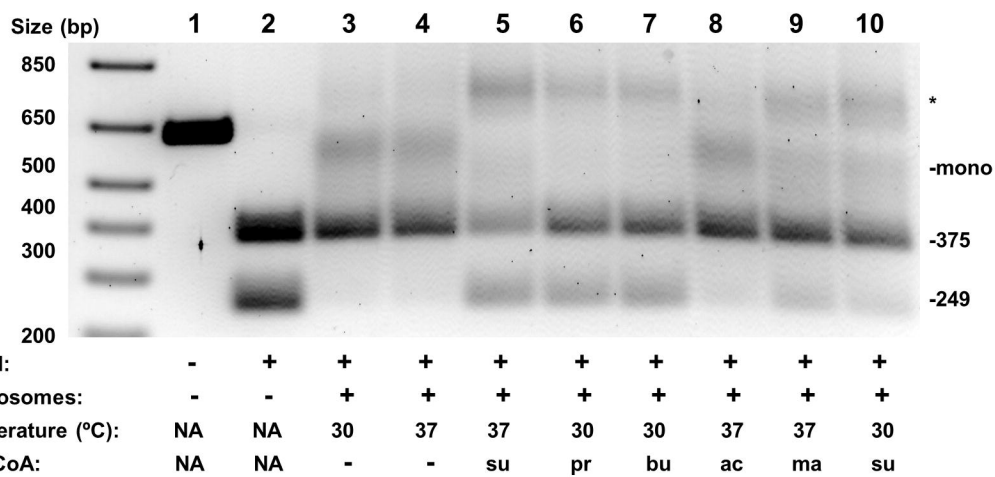**Fig S4**



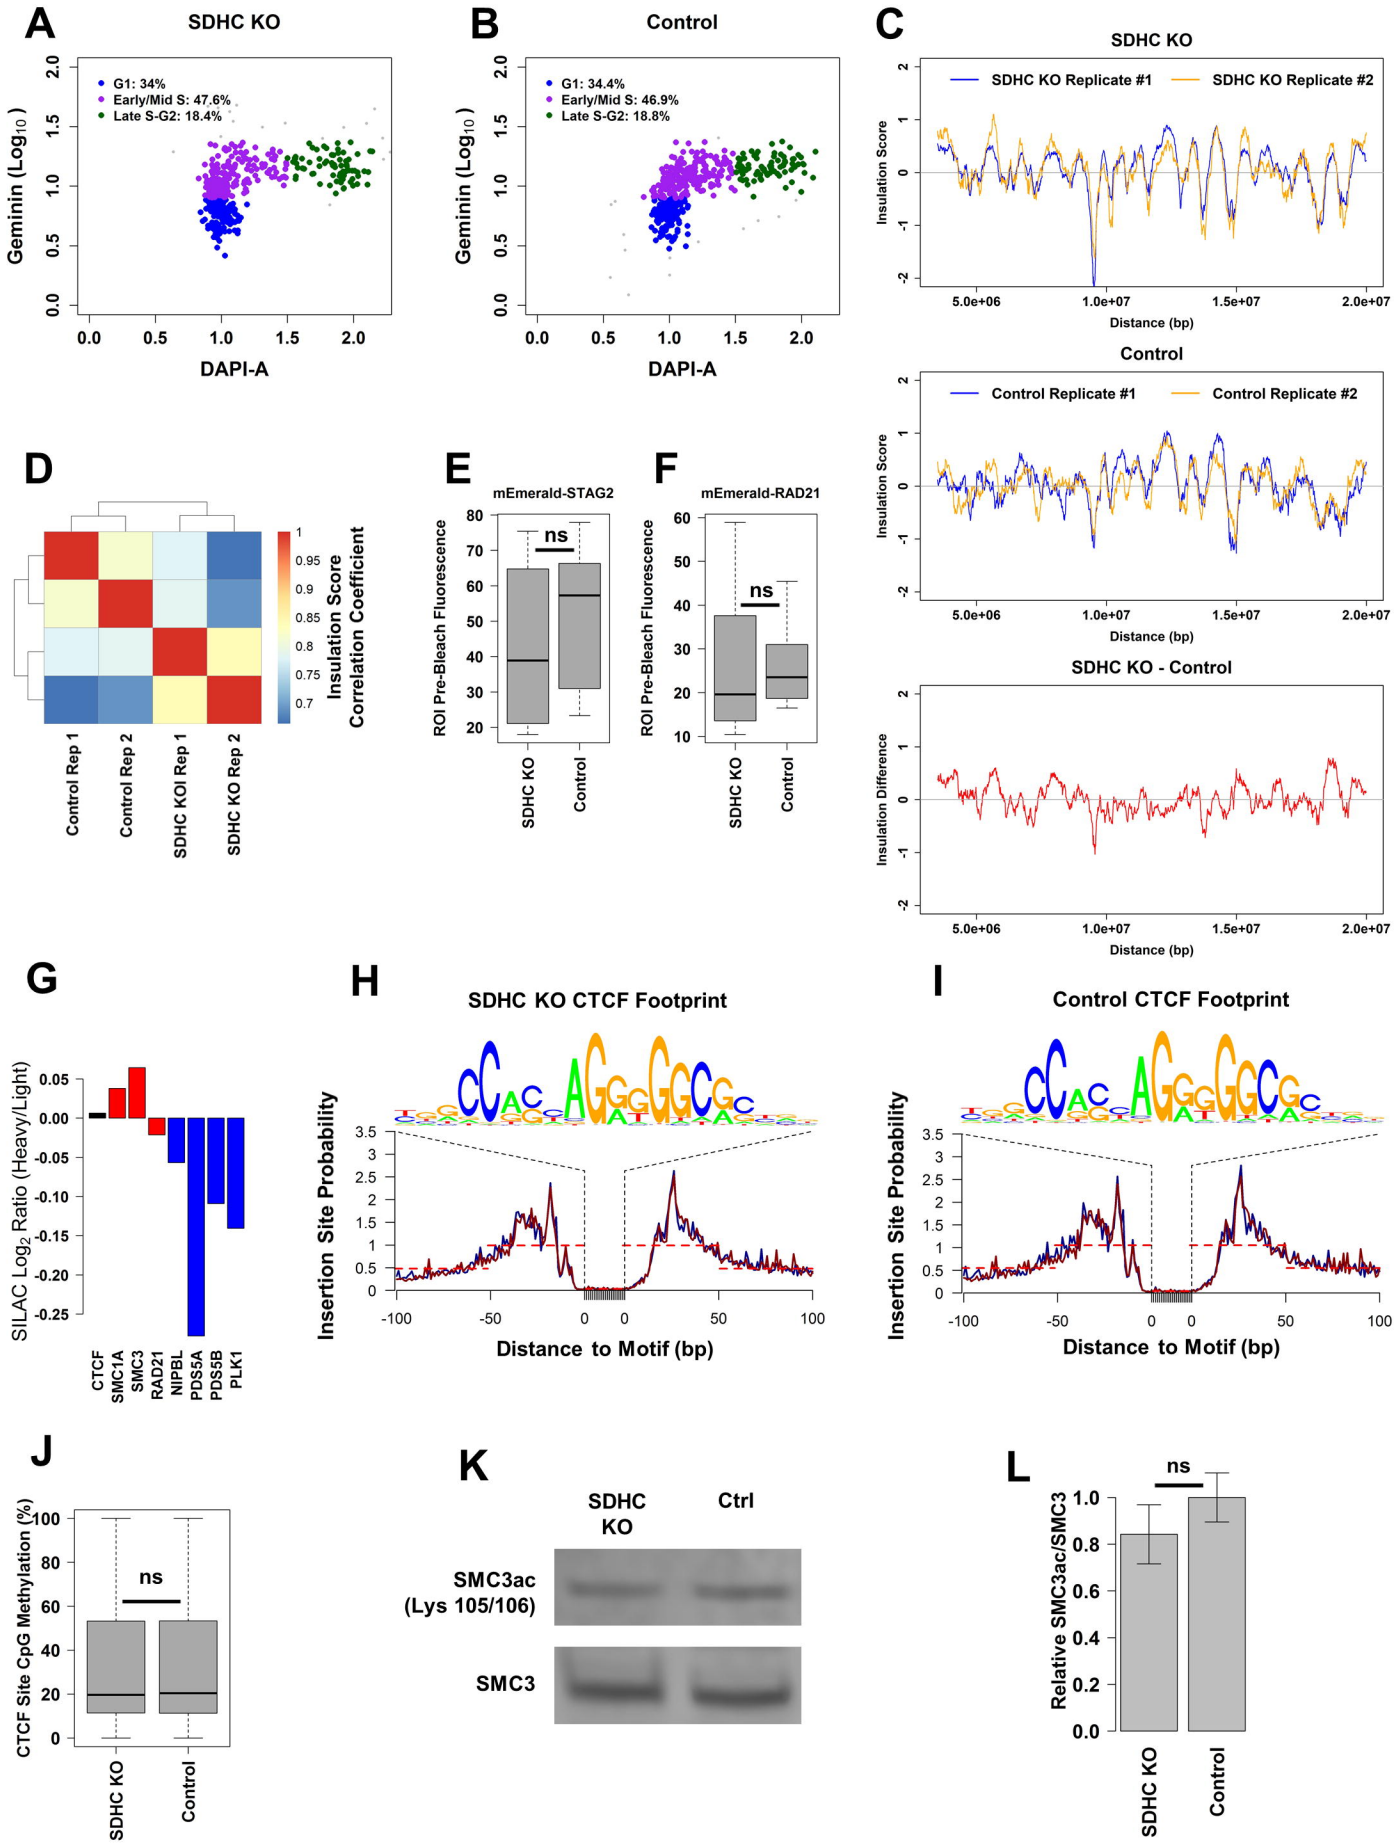

**Fig S5**
